# Supplementary material for: The accessible chromatin landscape of the murine hippocampus at single-cell resolution
Source: PubMed Central journal article supplement — Genome Res. 2019 May;29(5):857–69. doi: 10.1101/gr.243725.118 (PMC6499306; doi:10.1101/gr.243725.118), 2019-05
Supplement: supp_gr.243725.118_Supplemental_Material.pdf [file supp_gr.243725.118_Supplemental_Material.pdf]

# Supplemental Material

## The accessible chromatin landscape of the murine hippocampus at single-cell resolution

John R. Sinnamon<sup>1,a,b</sup>, Kristof A. Torkenczy<sup>2,a</sup>, Michael W. Linhoff<sup>1</sup>, Sarah Vitak<sup>2</sup>, Ryan M. Mulqueen<sup>2</sup>, Hannah Pliner<sup>3</sup>, Cole Trapnell<sup>3</sup>, Frank J. Steemers<sup>4</sup>, Gail Mandel<sup>1</sup>, Andrew C. Adey<sup>2,5,6,b</sup>

- 1) The Vollum Institute, Portland, OR, USA
- 2) Oregon Health & Science University, Department of Molecular and Medical Genetics, Portland, OR, USA
- 3) University of Washington, Department of Genome Sciences, Seattle, WA, USA
- 4) Illumina, Inc., San Diego, CA, USA
- 5) Knight Cardiovascular Institute, Portland, OR, USA
- 6) Knight Cancer Institute, Portland, OR, USA
- 7) Knight Center for Early Detection Advanced Research, Oregon Health & Science University, Portland, OR, USA

<sup>a</sup> Denotes equal contribution

<sup>b</sup> To whom correspondence should be addressed ([adey@ohsu.edu](mailto:adey@ohsu.edu), [sinnamon@ohsu.edu](mailto:sinnamon@ohsu.edu))

Lead contact: [adey@ohsu.edu](mailto:adey@ohsu.edu)

## Table of Contents

|                              |    |
|------------------------------|----|
| Supplemental Table 1 .....   | 2  |
| Supplemental Table 2 .....   | 3  |
| Supplemental Table 3 .....   | 4  |
| Supplemental Figure 1 .....  | 5  |
| Supplemental Figure 2 .....  | 6  |
| Supplemental Figure 3 .....  | 7  |
| Supplemental Figure 4 .....  | 22 |
| Supplemental Figure 5 .....  | 23 |
| Supplemental Figure 6 .....  | 25 |
| Supplemental Figure 7 .....  | 26 |
| Supplemental Figure 8 .....  | 27 |
| Supplemental Figure 9 .....  | 36 |
| Supplemental Figure 10 ..... | 37 |
| Supplemental Figure 11 ..... | 38 |
| Supplemental Figure 12 ..... | 39 |
| Supplemental Figure 13 ..... | 40 |
| Supplemental Figure 14 ..... | 41 |
| Supplemental Figure 15 ..... | 42 |
| Supplemental Figure 16 ..... | 43 |
| Supplemental Figure 17 ..... | 48 |
| Supplemental Figure 18 ..... | 49 |
| Supplemental Figure 19 ..... | 50 |
| Supplemental Figure 20 ..... | 51 |
| Supplemental Figure 21 ..... | 52 |
| Supplemental Figure 22 ..... | 53 |
| Supplemental Figure 23 ..... | 54 |
| Supplemental Figure 24 ..... | 55 |
| Supplemental Figure 25 ..... | 56 |
| Supplemental Figure 26 ..... | 57 |
| Supplemental Note 1 .....    | 59 |
| Supplemental Protocol .....  | 61 |

|                                   | <b>This study</b>                                                                                                  | <b>Preissl et al. 2018</b>    | <b>Cusanovich et al. 2015</b> |
|-----------------------------------|--------------------------------------------------------------------------------------------------------------------|-------------------------------|-------------------------------|
| <b>Single cell strategy</b>       | Combinatorial indexing                                                                                             | Combinatorial indexing        | Combinatorial indexing        |
| <b>Species</b>                    | Mouse                                                                                                              | Human                         | Cell lines                    |
| <b>Reads per cell/nucleus</b>     | Fresh: 5,021-97,083 (23,512 mean)<br>Frozen: 3,455-151,534 (32,870 mean)<br>In Vitro: 2,265-327,904 (43,532 mean)  | 9,375-18,397                  | 1,390-3,094                   |
| <b>Fraction of reads in peaks</b> | Fresh: 25.0-57.4 % (30.8 % median)<br>Frozen: 25.0-58.2 % (33.9 % median)<br>In Vitro: 25.0-64.8 % (39.5 % median) | 15.7-37.4%                    | 41-59 %                       |
|                                   | <b>Buenrostro et al. 2015</b>                                                                                      | <b>Cusanovich et al. 2018</b> | <b>Cusanovich et al. 2018</b> |
| <b>Single cell strategy</b>       | Microfluidics                                                                                                      | Combinatorial indexing        | Combinatorial indexing        |
| <b>Species</b>                    | Cell lines                                                                                                         | Drosophila                    | Mouse                         |
| <b>Reads per cell/nucleus</b>     | 73,000 (mean)                                                                                                      | 7,181-8,024                   | 8,743-23,456                  |
| <b>Fraction of reads in peaks</b> | > 15%                                                                                                              | n.r.                          | 36%                           |

**Supplemental Table 1: Data comparison with other single-cell ATAC-seq studies**

Comparison of QC metrics for our study broken down by sample and other single-cell ATAC-seq publications based on the reporting by those publications.

| Cluster          | Tissue | Cells | Percent (of tissue) |
|------------------|--------|-------|---------------------|
| Noise            | Frozen | 5     | n/a                 |
|                  | Fresh  | 10    | n/a                 |
| Granule Cells    | Frozen | 238   | 29.86%              |
|                  | Fresh  | 499   | 34.13%              |
| Interneurons     | Frozen | 66    | 8.28%               |
|                  | Fresh  | 61    | 4.17%               |
| Neurons1         | Frozen | 104   | 29.86%              |
|                  | Fresh  | 169   | 11.56%              |
| Neurons2         | Frozen | 251   | 31.49%              |
|                  | Fresh  | 496   | 33.93%              |
| Collisions       | Frozen | 25    | n/a                 |
|                  | Fresh  | 47    | n/a                 |
| Astrocytes       | Frozen | 33    | 4.14%               |
|                  | Fresh  | 89    | 6.09%               |
| Microglia        | Frozen | 25    | 3.14%               |
|                  | Fresh  | 18    | 1.23%               |
| Oligodendrocytes | Frozen | 60    | 7.53%               |
|                  | Fresh  | 91    | 6.22%               |
| OPCs             | Frozen | 20    | 2.51%               |
|                  | Fresh  | 39    | 2.67%               |
| Total Frozen     |        | 827   | 35.25%              |
| Total Fresh      |        | 1519  | 64.75%              |

### Supplemental Table 2: Cell Type Composition

Proportion of cells assigned to each cluster for the *In Vivo* dataset along with the fresh vs. frozen breakdown.

|                 | Chrom. | Start       | End         |                 | Chrom. | Start       | End         |                    | Chrom. | Start       | End         |
|-----------------|--------|-------------|-------------|-----------------|--------|-------------|-------------|--------------------|--------|-------------|-------------|
| Granule Cells   | chr2   | 12,805,030  | 12,805,581  | Neurons 2 (CA3) | chr19  | 23,330,204  | 23,331,209  | Oligodendrocytes   | chr10  | 83,906,604  | 83,907,477  |
|                 | chr18  | 13,157,877  | 13,158,511  |                 | chr2   | 169,049,869 | 169,050,512 |                    | chr12  | 100,073,051 | 100,073,764 |
|                 | chr19  | 24,665,688  | 24,666,194  |                 | chr15  | 94,011,340  | 94,012,637  |                    | chr18  | 75,544,174  | 75,544,677  |
|                 | chr8   | 24,303,072  | 24,303,600  |                 | chr19  | 18,368,387  | 18,369,139  |                    | chr13  | 56,581,977  | 56,583,211  |
|                 | chr14  | 11,231,939  | 11,232,458  |                 | chr9   | 97,883,149  | 97,883,765  |                    | chr18  | 75,541,370  | 75,541,889  |
|                 | chr1   | 190,306,260 | 190,306,838 |                 | chr6   | 55,836,835  | 55,837,355  |                    | chr9   | 25,230,456  | 25,231,009  |
|                 | chr1   | 190,642,627 | 190,643,179 |                 | chr18  | 78,243,805  | 78,244,339  |                    | chr17  | 8,350,898   | 8,351,641   |
|                 | chr5   | 88,830,139  | 88,830,687  |                 | chr3   | 65,884,483  | 65,885,067  |                    | chr2   | 127,627,327 | 127,628,521 |
|                 | chr1   | 55,828,229  | 55,828,748  |                 | chr10  | 111,308,849 | 111,309,852 |                    | chr14  | 34,590,699  | 34,591,715  |
|                 | chr10  | 48,010,760  | 48,012,230  |                 | chr1   | 127,541,771 | 127,542,290 |                    | chr9   | 25,240,906  | 25,241,521  |
| Interneurons    | chr2   | 158,610,479 | 158,611,273 | Astrocytes      | chr3   | 50,421,595  | 50,422,393  | Oligo. Progenitors | chr5   | 65,434,477  | 65,435,230  |
|                 | chr2   | 71,529,369  | 71,529,901  |                 | chr10  | 18,359,980  | 18,360,766  |                    | chr2   | 125,723,709 | 125,725,049 |
|                 | chr11  | 88,028,257  | 88,028,867  |                 | chr2   | 102,620,556 | 102,621,235 |                    | chr9   | 56,868,193  | 56,868,694  |
|                 | chr2   | 22,621,845  | 22,622,763  |                 | chr14  | 65,889,584  | 65,890,606  |                    | chr6   | 30,572,647  | 30,573,201  |
|                 | chr6   | 55,398,876  | 55,399,381  |                 | chr14  | 121,113,651 | 121,114,302 |                    | chr7   | 79,729,178  | 79,729,709  |
|                 | chr5   | 124,206,256 | 124,206,918 |                 | chr1   | 154,139,439 | 154,140,079 |                    | chr14  | 57,534,993  | 57,535,499  |
|                 | chr5   | 31,589,699  | 31,590,705  |                 | chr16  | 18,083,199  | 18,083,957  |                    | chr4   | 106,317,513 | 106,318,014 |
|                 | chr2   | 36,011,161  | 36,011,981  |                 | chr1   | 182,483,531 | 182,484,443 |                    | chr3   | 51,749,422  | 51,750,382  |
|                 | chr5   | 35,985,506  | 35,986,014  |                 | chr5   | 33,705,059  | 33,705,607  |                    | chr1   | 172,064,528 | 172,065,243 |
|                 | chr19  | 15,052,684  | 15,053,503  |                 | chr12  | 25,239,950  | 25,241,190  |                    | chr6   | 146,955,683 | 146,956,269 |
| Neurons 1 (CA1) | chr18  | 15,008,128  | 15,008,636  | Microglia       | chr7   | 67,445,504  | 67,446,168  |                    |        |             |             |
|                 | chr9   | 22,030,329  | 22,030,831  |                 | chr7   | 126,746,073 | 126,747,014 |                    |        |             |             |
|                 | chr8   | 40,455,798  | 40,456,317  |                 | chr15  | 27,702,515  | 27,703,332  |                    |        |             |             |
|                 | chr7   | 84,576,178  | 84,576,680  |                 | chr7   | 80,078,688  | 80,079,367  |                    |        |             |             |
|                 | chr13  | 73,912,658  | 73,913,254  |                 | chr15  | 59,728,185  | 59,728,766  |                    |        |             |             |
|                 | chr2   | 46,330,878  | 46,331,408  |                 | chr7   | 145,111,444 | 145,112,140 |                    |        |             |             |
|                 | chrX   | 145,341,895 | 145,342,781 |                 | chr4   | 129,782,344 | 129,783,082 |                    |        |             |             |
|                 | chr6   | 89,050,828  | 89,051,367  |                 | chr13  | 83,571,978  | 83,572,659  |                    |        |             |             |
|                 | chr10  | 54,551,634  | 54,552,521  |                 | chr17  | 88,581,421  | 88,581,940  |                    |        |             |             |
|                 | chr3   | 74,734,781  | 74,735,299  |                 | chr7   | 120,851,508 | 120,852,400 |                    |        |             |             |

### Supplemental Table 3: Differentially Accessible Peaks

The top 10 differentially accessible (see Methods) peaks corresponding to each cluster. Plots for these can be found in Supplemental Fig. 4.

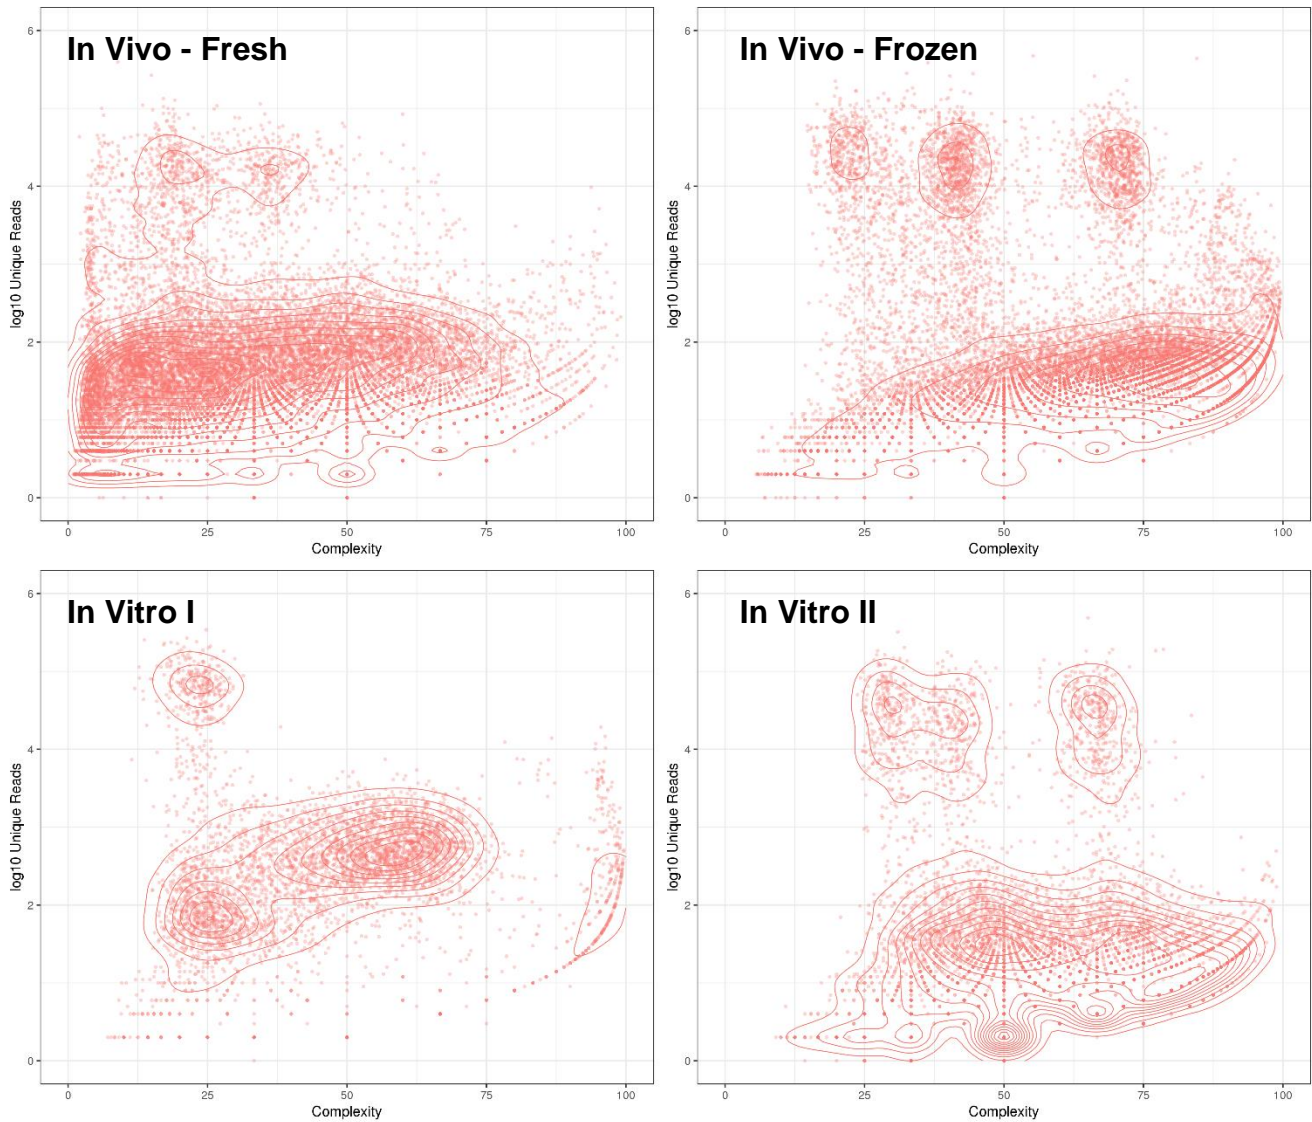

### Supplemental Figure 1: Library complexity

The Log<sub>10</sub> total unique reads per cell (y-axis) is plotted with respect to the fraction of unique reads per cell (x-axis) for the four sets of libraries. Populations of true cells are the clusters of points above 1,000 unique reads with the remaining points comprising barcode combinations that do not contain cells. For plots with multiple populations of cells, the different populations represent different sets of PCR wells that were pooled together as opposed to biological replicates.

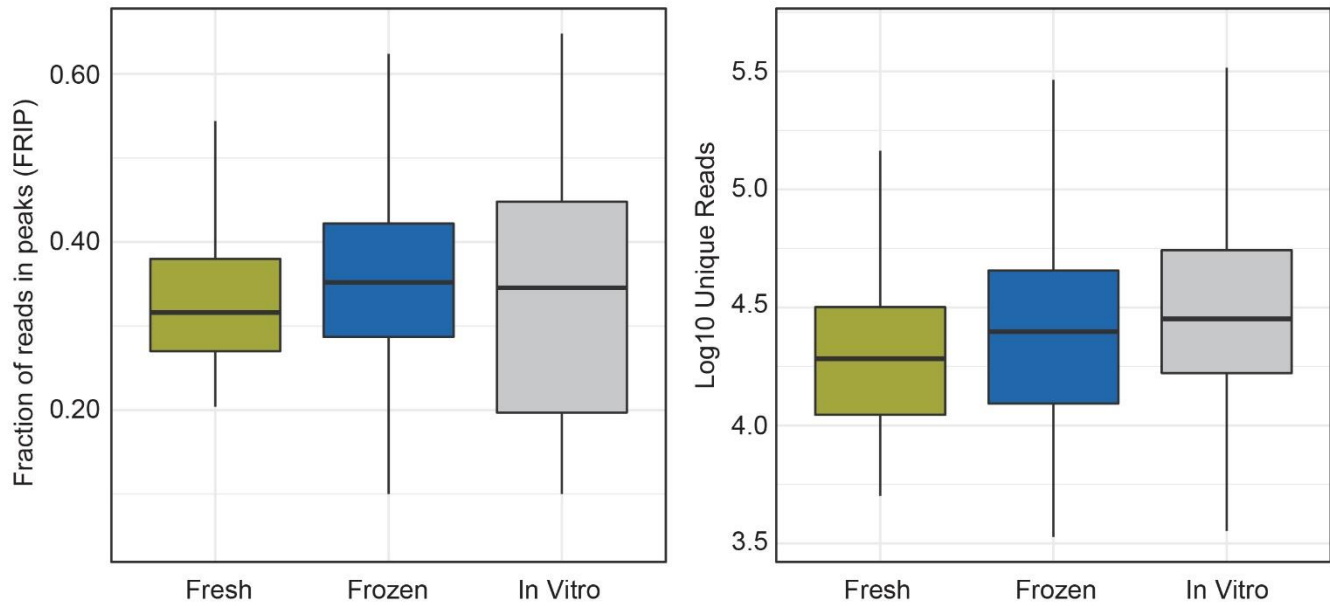

**Supplemental Figure 2: QC between fresh, frozen, and in vitro libraries**

Comparison between the fraction of reads in peaks (right, FRIP, pre- 25% minimum filter) and the total unique read counts (left) for the fresh, frozen, and in vitro preparations.

### **Supplemental Figure 3: Marker Gene Dashboards**

Marker gene dashboards (A-N) contain three plots and additional information. For each dashboard the gene name can be found in the upper right with the specified cell type below in parentheses. The literature reference for why the gene was selected is included below the gene title. The top left plot is a 'read plot' of the region around the gene (+/- 100,000 bp) with genes in the region plotted at the top followed by rows for each cell with unique reads in the region colored by the cluster identity. To the right of the read plot is an *in situ* hybridization image from the Allen Brain Atlas for the specified gene. Lastly, the bottom panel is a genome browser view showing the aggregated cluster sci-ATAC-seq profiles at a zoomed in region around the marker gene along with mouse hippocampus H3K4me3 and H3K27ac ChIP-seq peaks obtained from the ENCODE project. Black arrows on the read plot and genome viewer screenshot indicate cluster-specific signal and the corresponding cluster in the legend of the read plot.

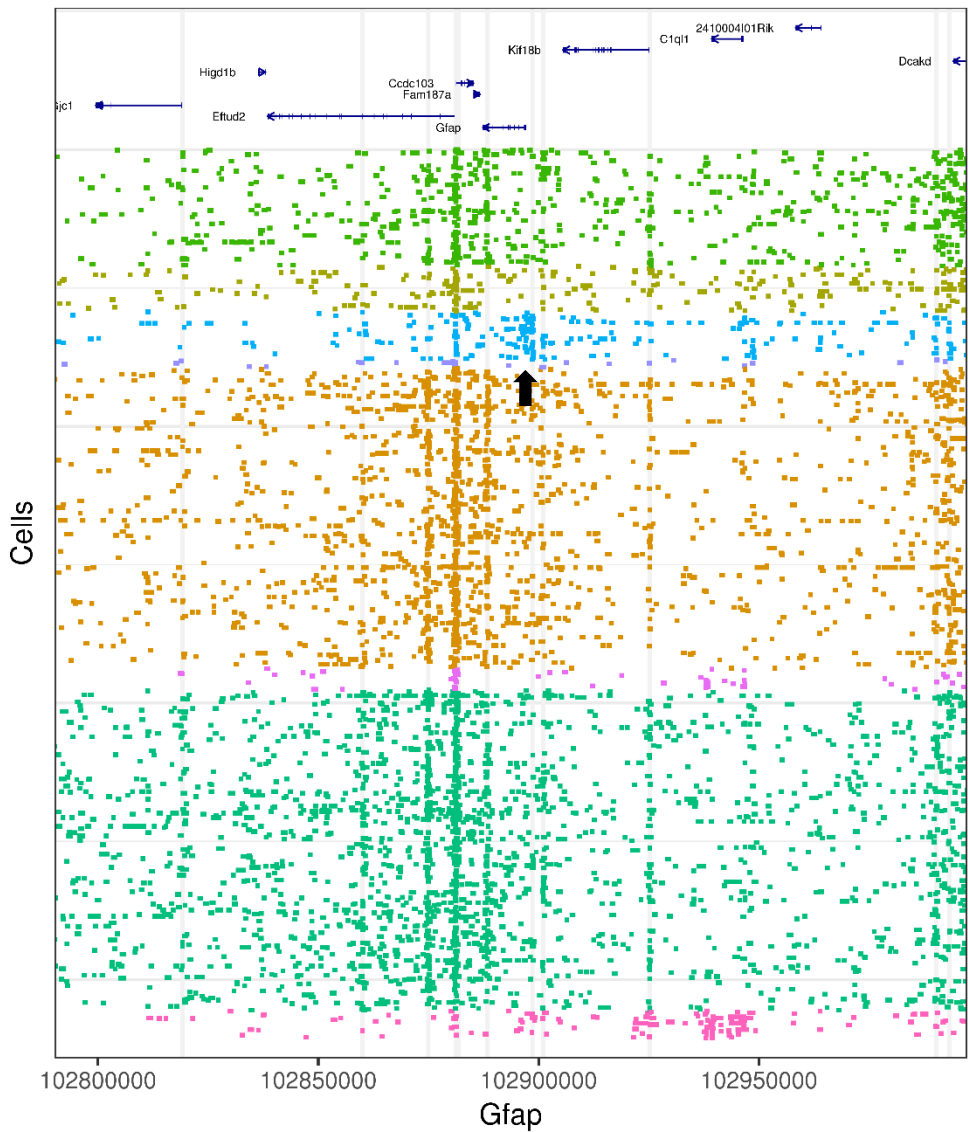

# A) *Gfap* (Astrocytes)

PMID: 7952264  
Brain Pathol. 1994 Jul;4(3):229-37.

- AST ←
- GRN
- INT
- MRG
- NR1
- NR2
- OLI
- OPC

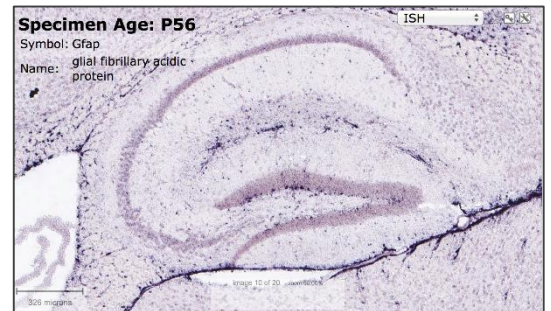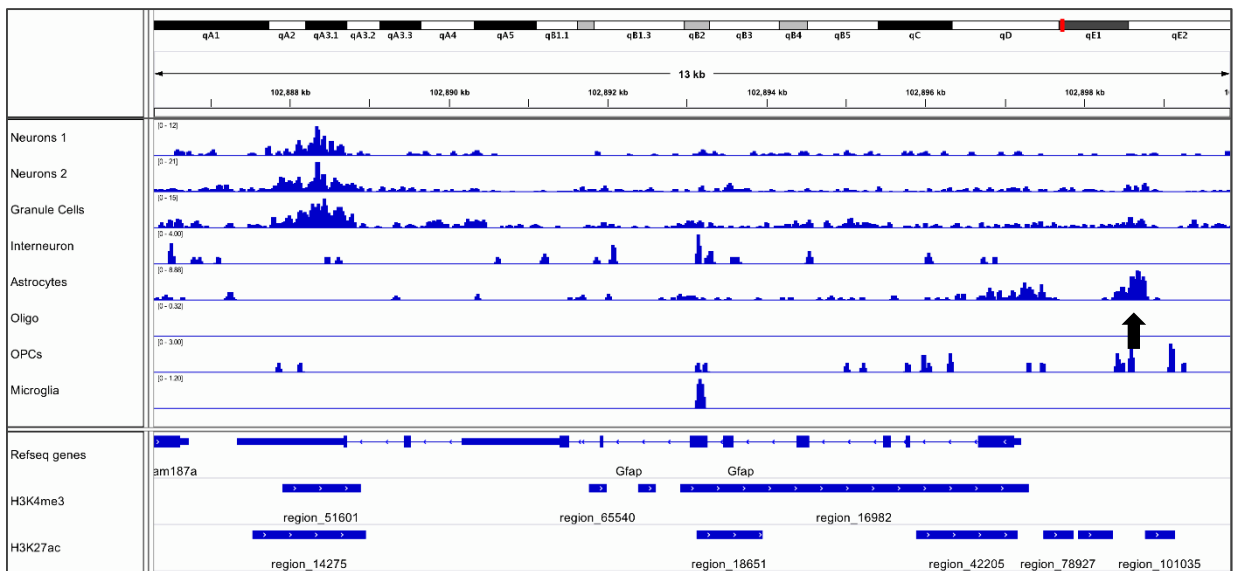



# B) *Glul* (Astrocytes)

PMID: 14400  
 Science. 1977 Mar 25;195(4284):1356-8  
 PMID: 24137157  
 Front Endocrinol (Lausanne). 2013 Oct 16;4:144.

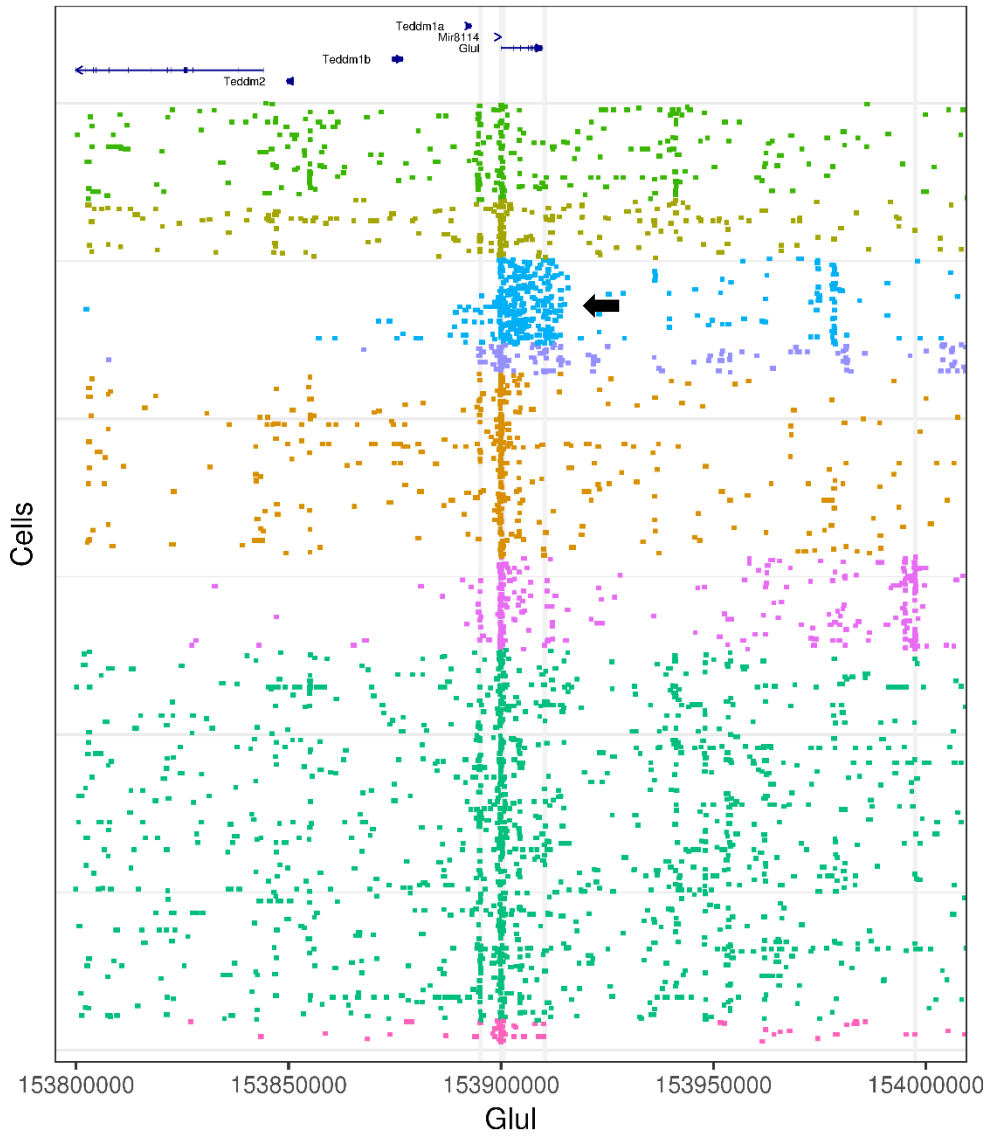

- AST ←
- GRN
- INT
- MRG
- NR1
- NR2
- OLI
- OPC

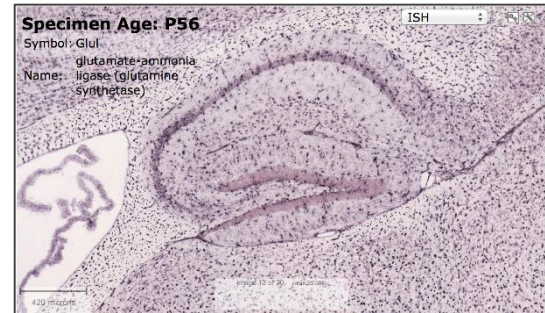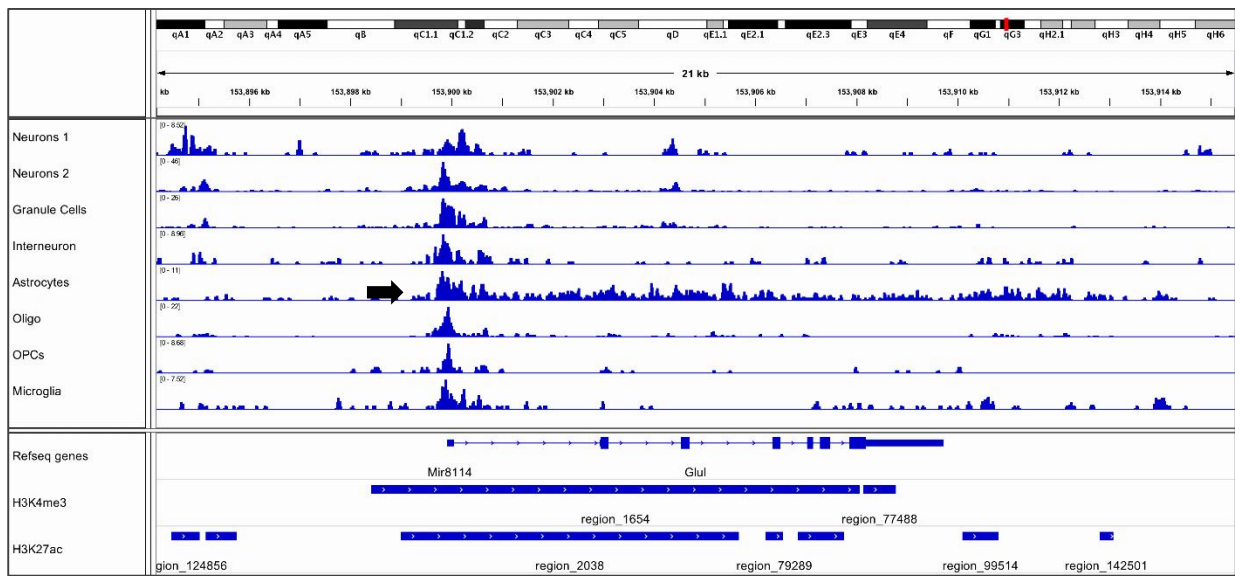

# C) *Wfs1* (CA1 Neurons)

PMID: 24336151  
 Nat Neurosci. 2014 Feb;17(2):269-79. doi:  
 10.1038/nn.3614

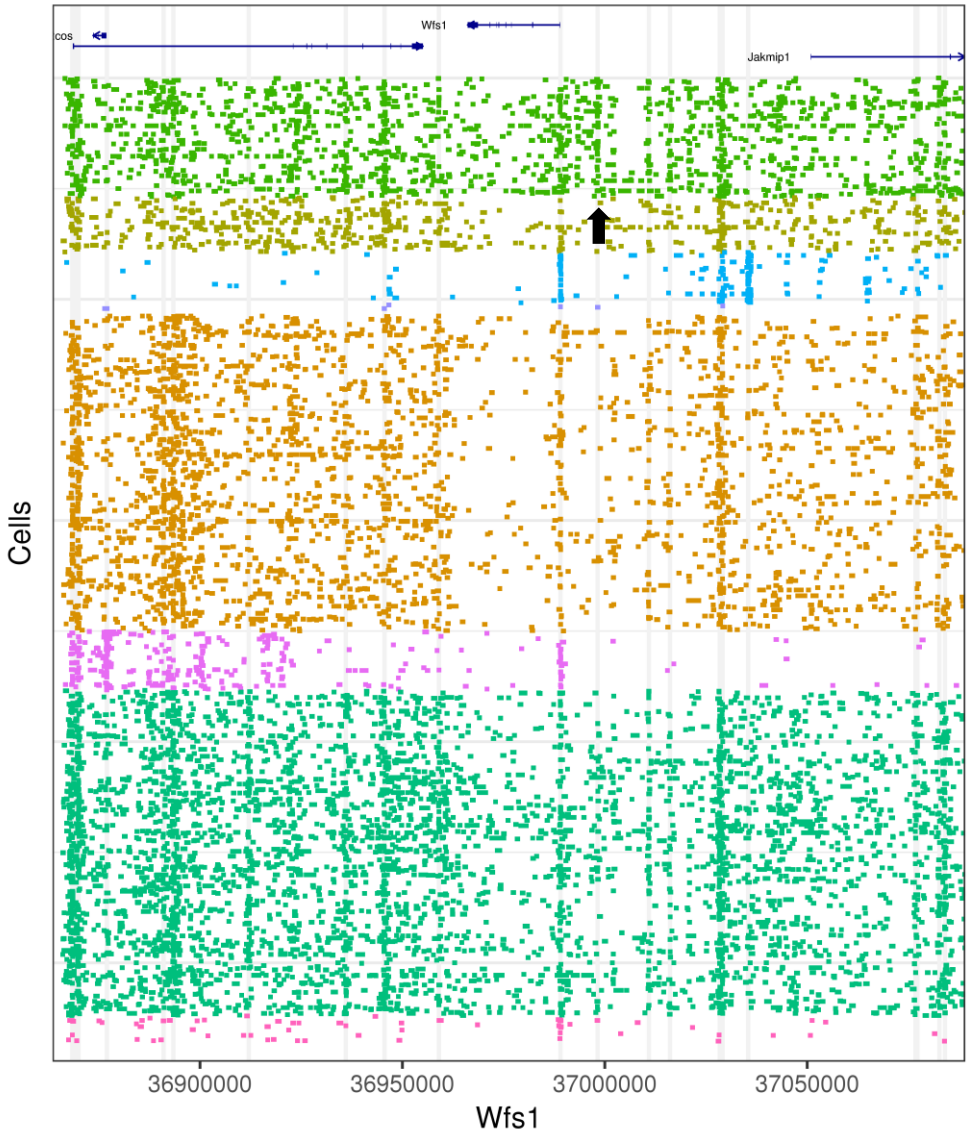

- AST
- GRN
- INT
- MRG
- NR1 ←
- NR2
- OLI
- OPC

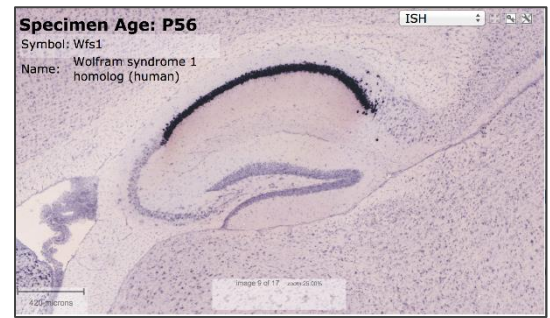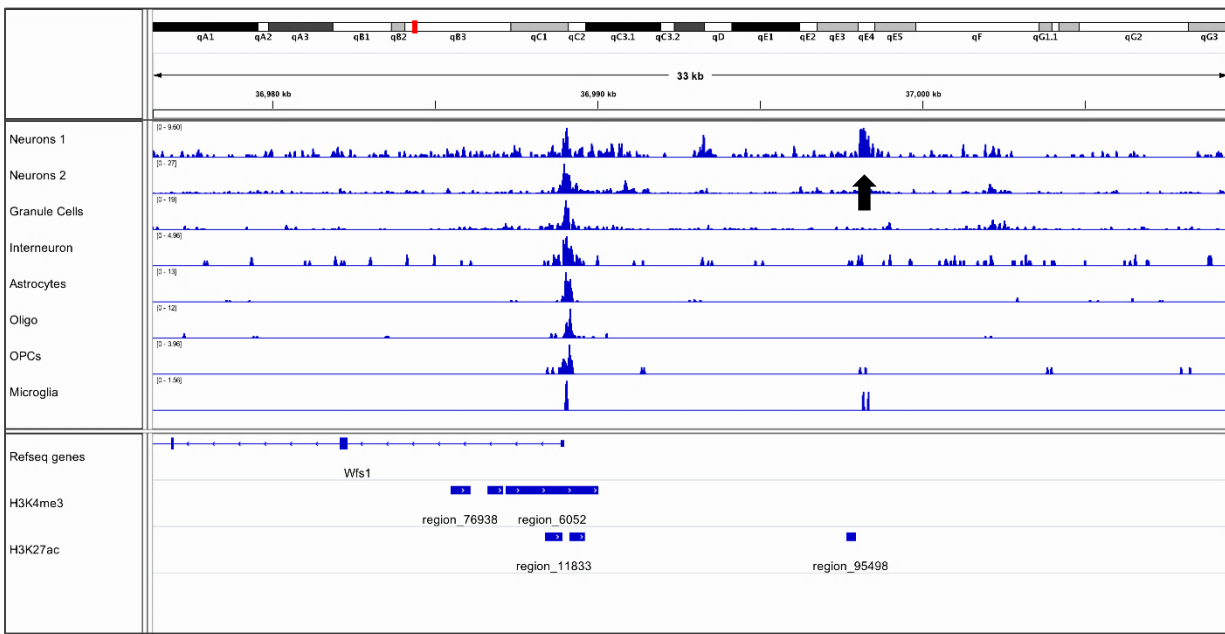

# D) *Dsp* (Dentate Granule Cells)

PMID: 15084669

DOI: 10.1523/JNEUROSCI.4710-03.2004

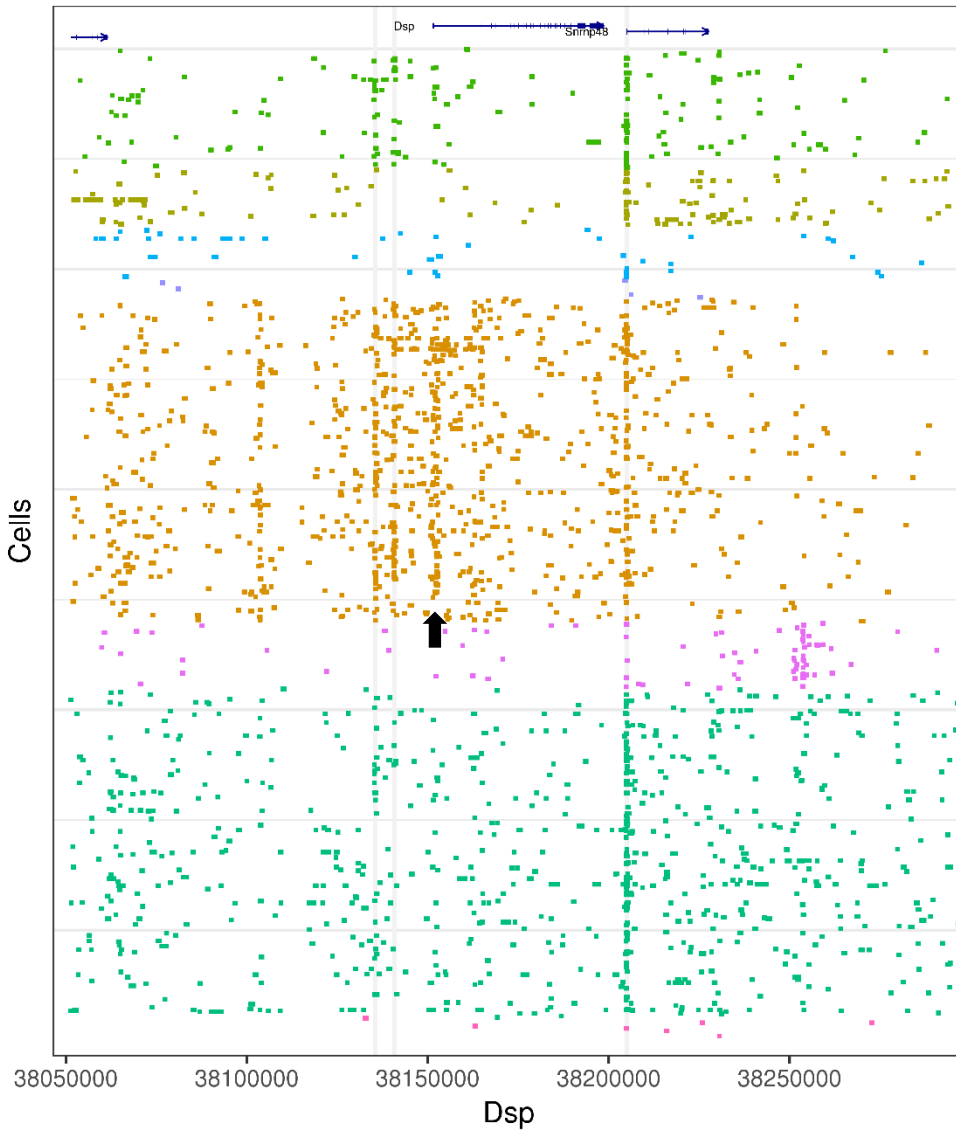

- AST
- GRN ←
- INT
- MRG
- NR1
- NR2
- OLI
- OPC

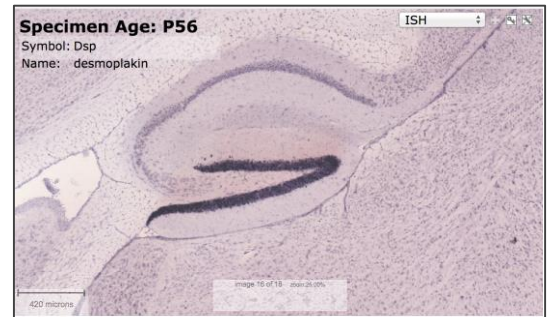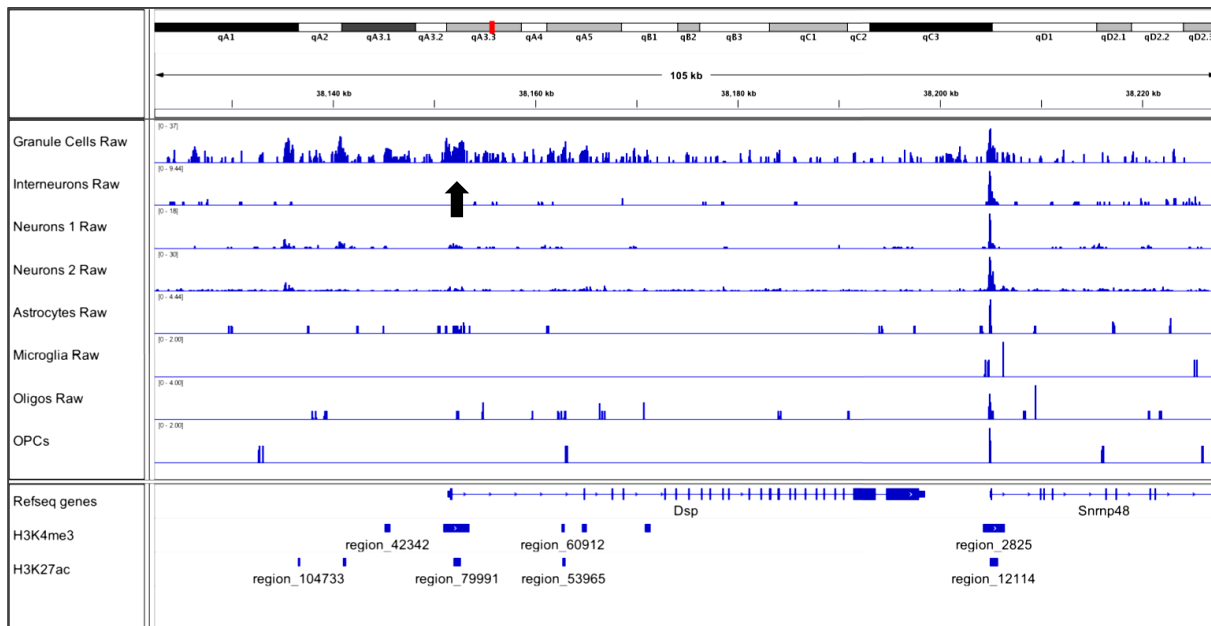

# E) *Prox1* (Dentate Granule Cells)

PMID: 22791897  
Development. 2012 Aug;139(16):3051-62. doi: 10.1242/dev.080002

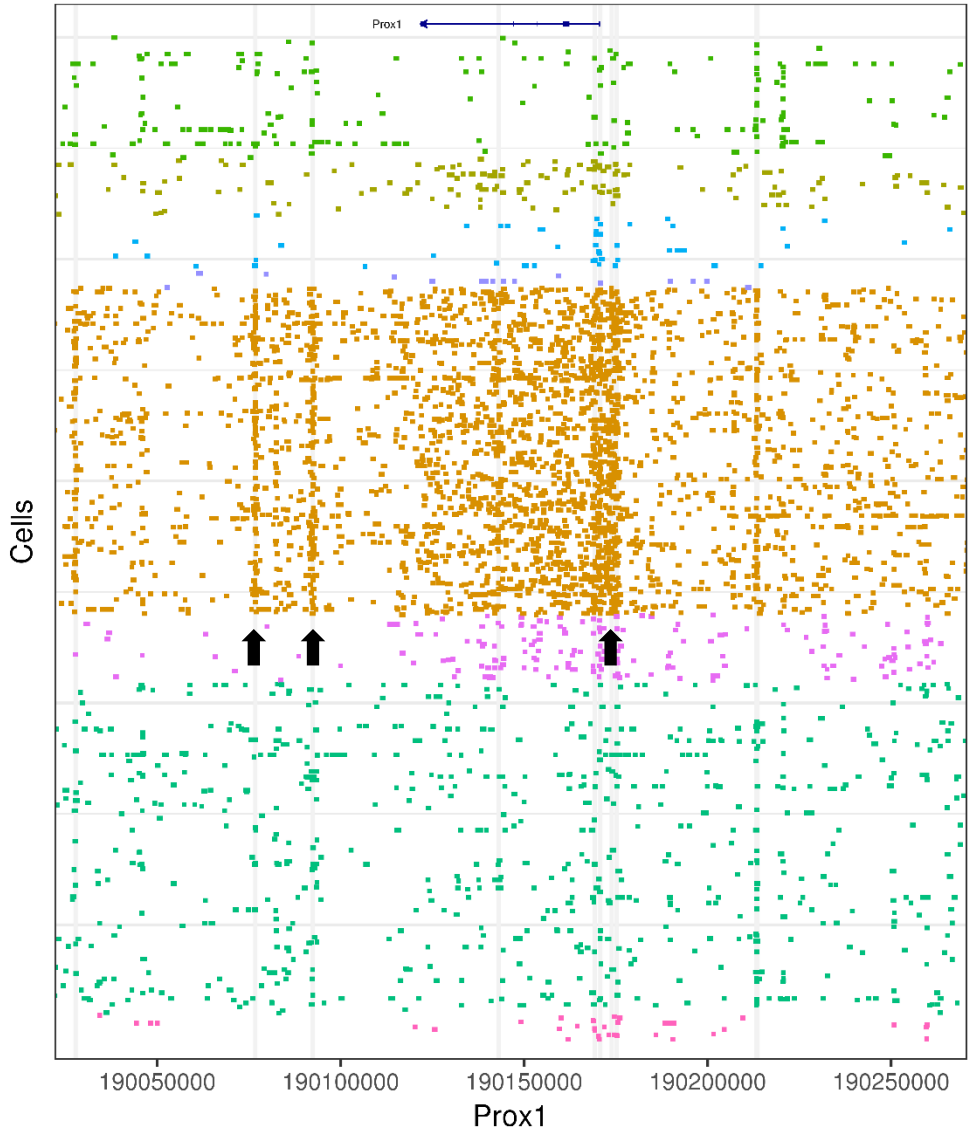

- AST
- GRN ←
- INT
- MRG
- NR1
- NR2
- OLI
- OPC

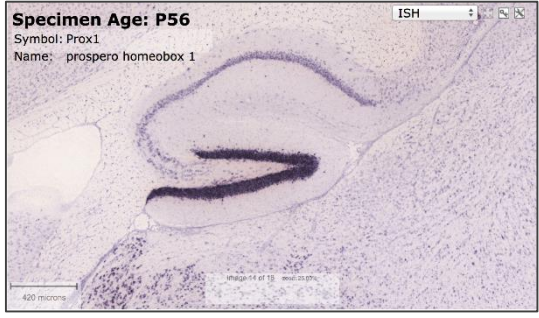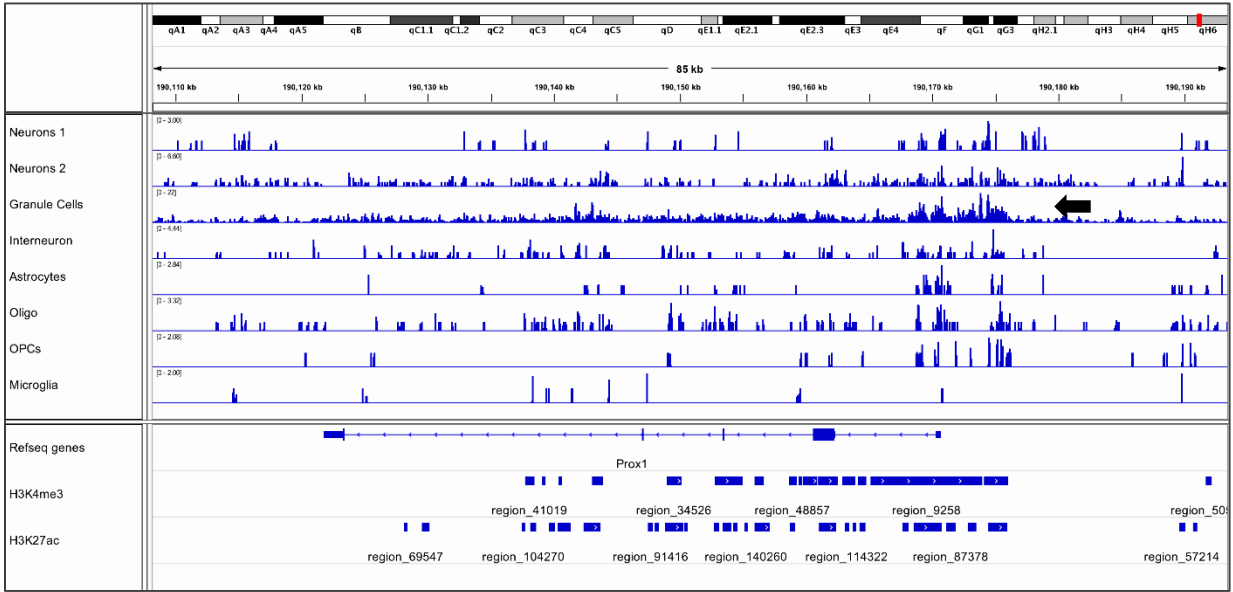

# F) *Col19a1* (Interneurons)

PMID: 19937713  
J Comp Neurol. 2010 Jan 10;518(2):229-53

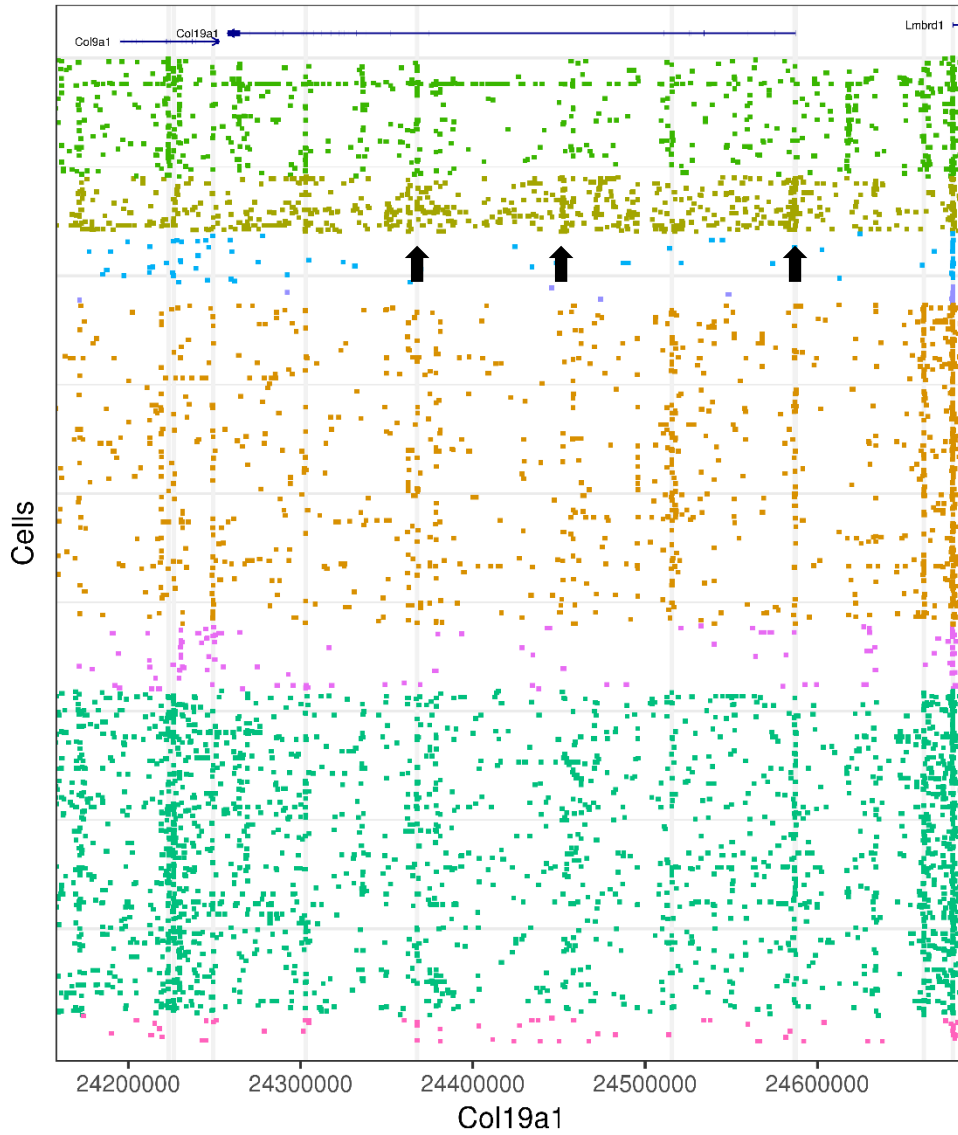

- AST
- GRN
- INT ←
- MRG
- NR1
- NR2
- OLI
- OPC

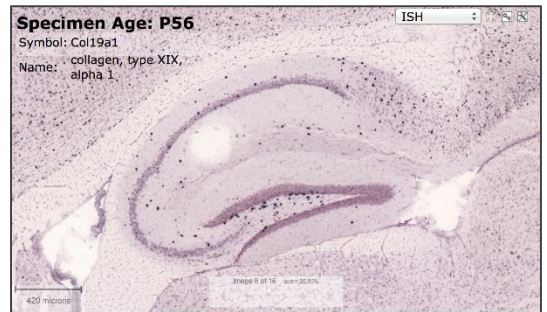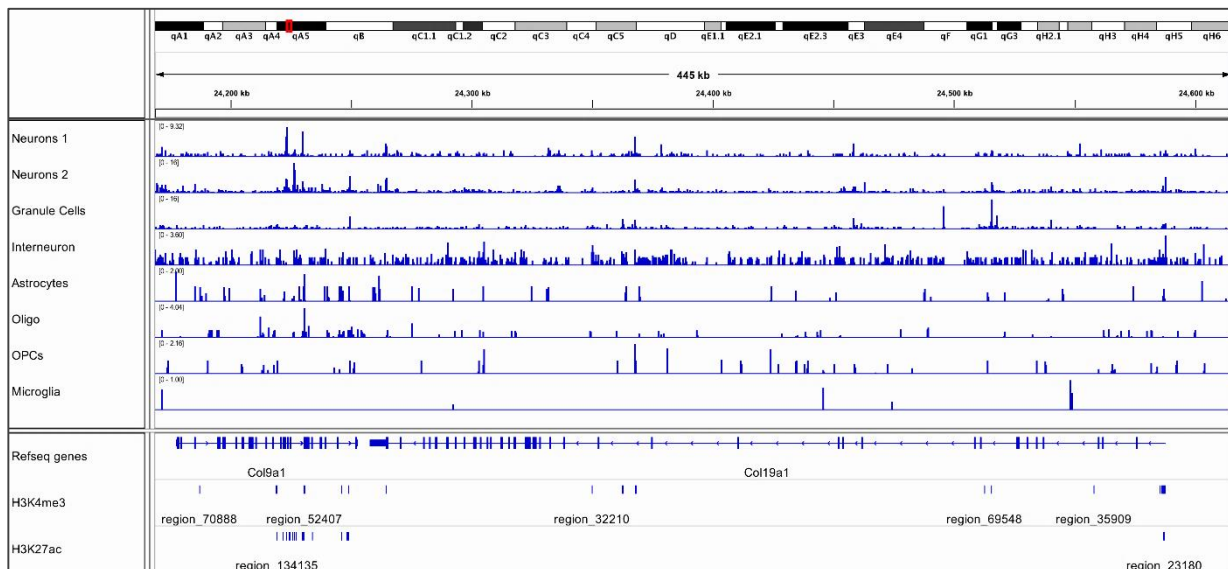

# G) *Dkk3* (Pyramidal Neurons)

PMID: 27113915  
 Elife. 2016 Apr 26;5:e14997.  
 doi: 10.7554/eLife.14997

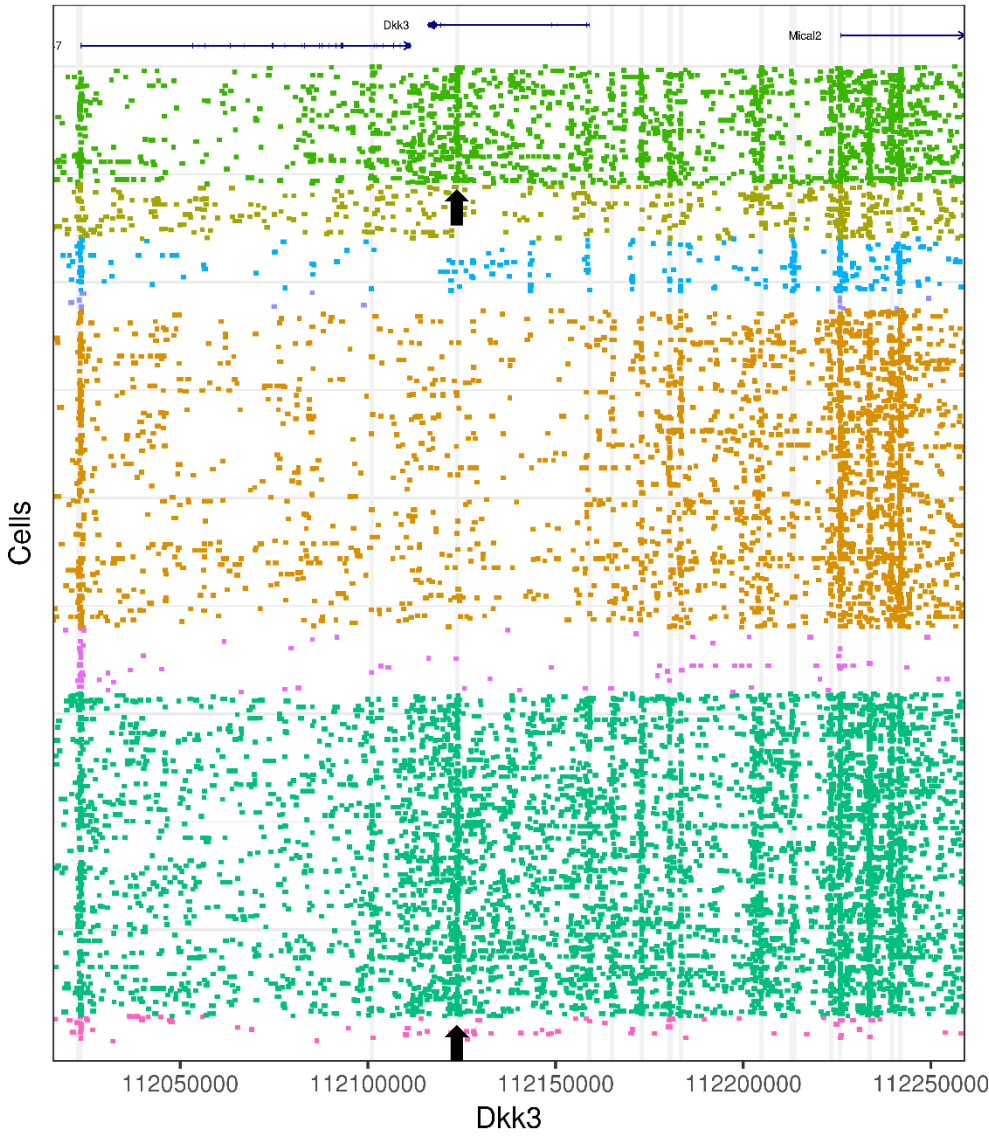

- AST
- GRN
- INT
- MRG
- NR1 ←
- NR2 ←
- OLI
- OPC

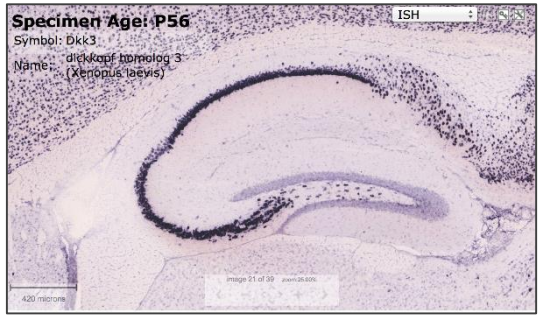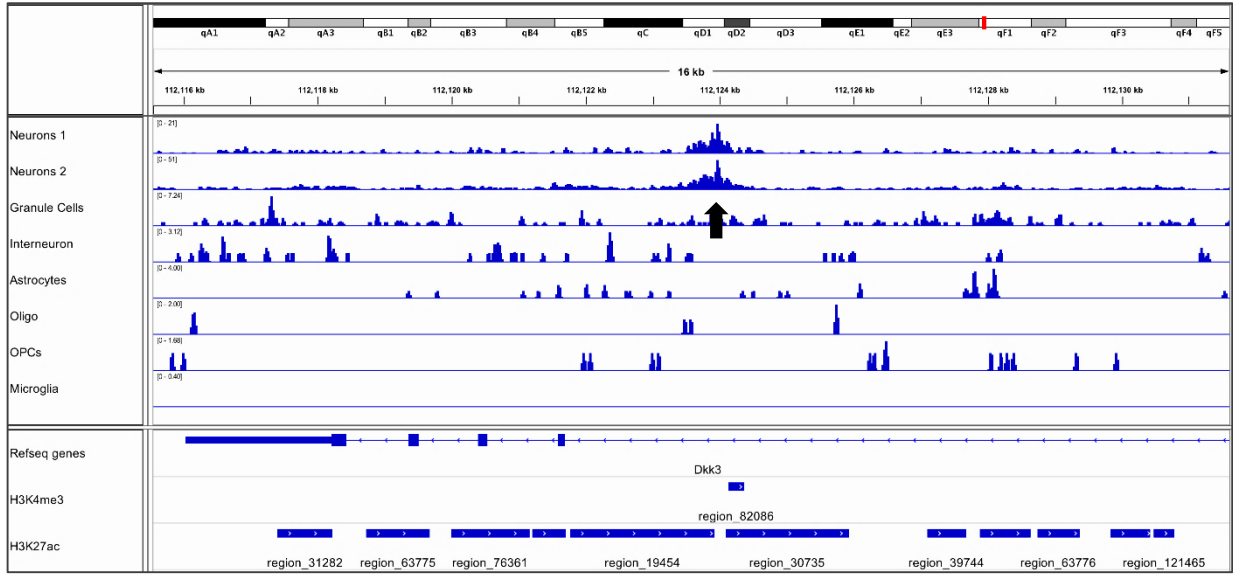

# H) *Ociad2* (Pyramidal Neurons)

PMID: 27113915  
Elife. 2016 Apr 26;5:e14997.  
doi: 10.7554/eLife.14997

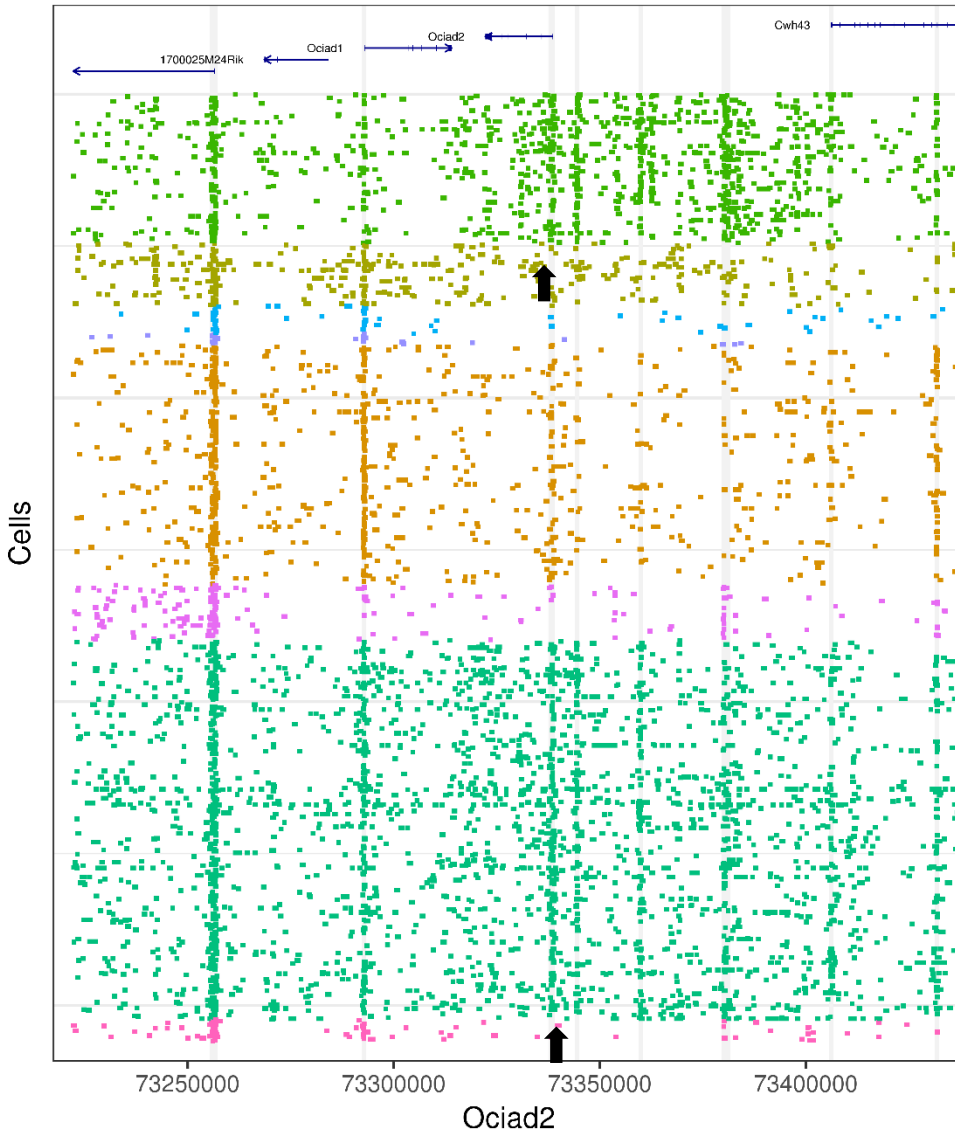

- AST
- GRN
- INT
- MRG
- NR1 ←
- NR2 ←
- OLI
- OPC

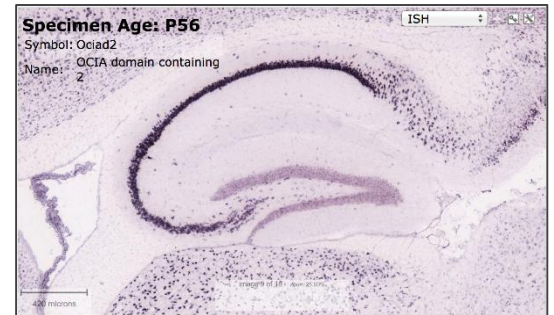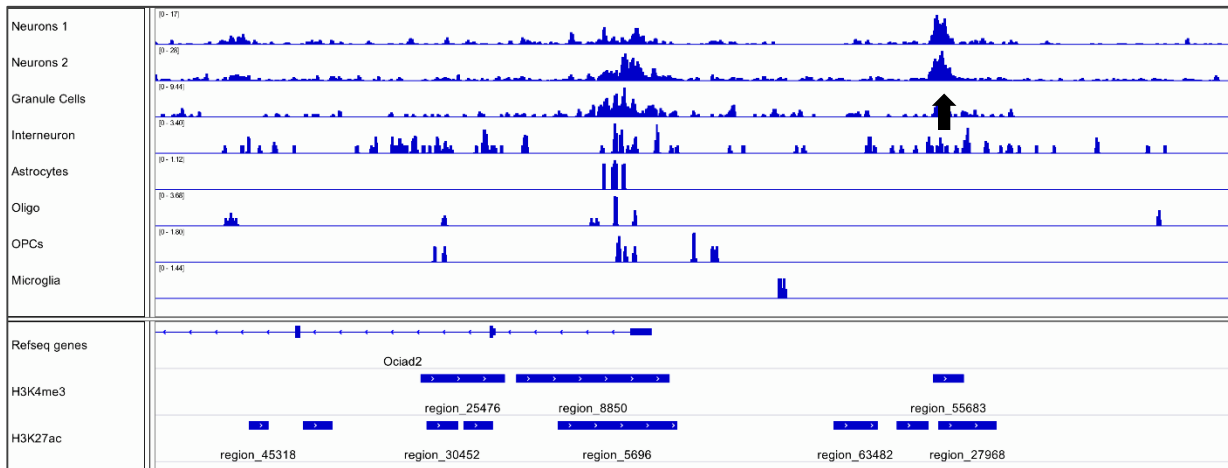

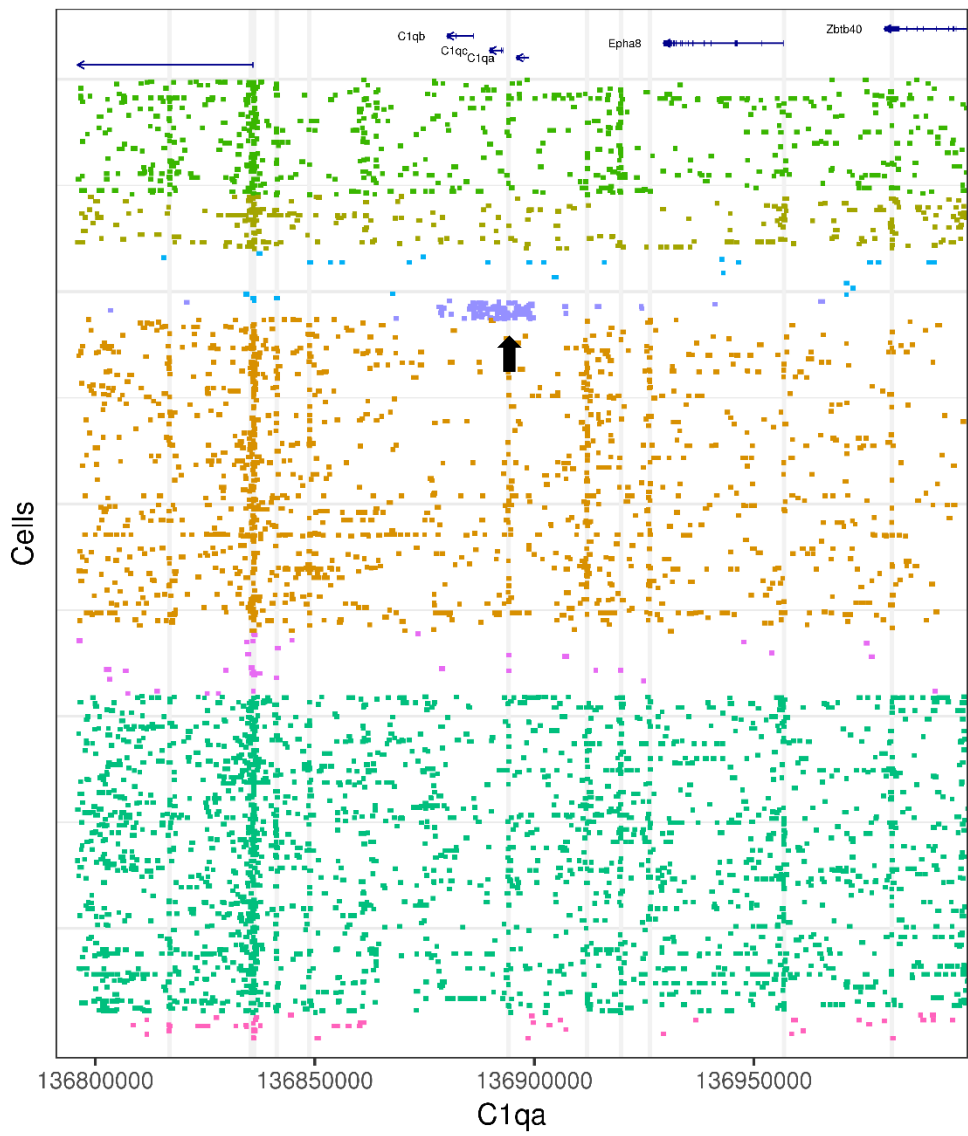

# I) *C1qa/c* (Microglia)

PMID: 26982357  
Immunity. 2016 Mar 15;44(3):505-515

- AST
- GRN
- INT
- MRG ←
- NR1
- NR2
- OLI
- OPC

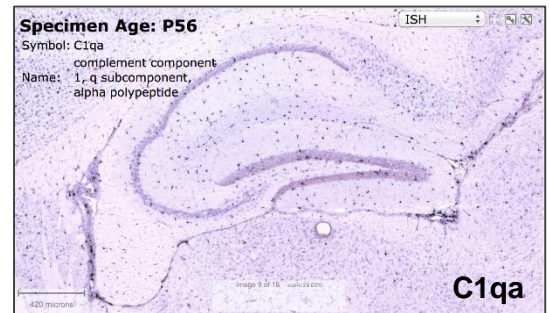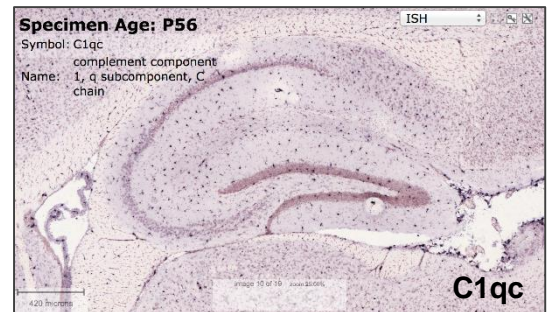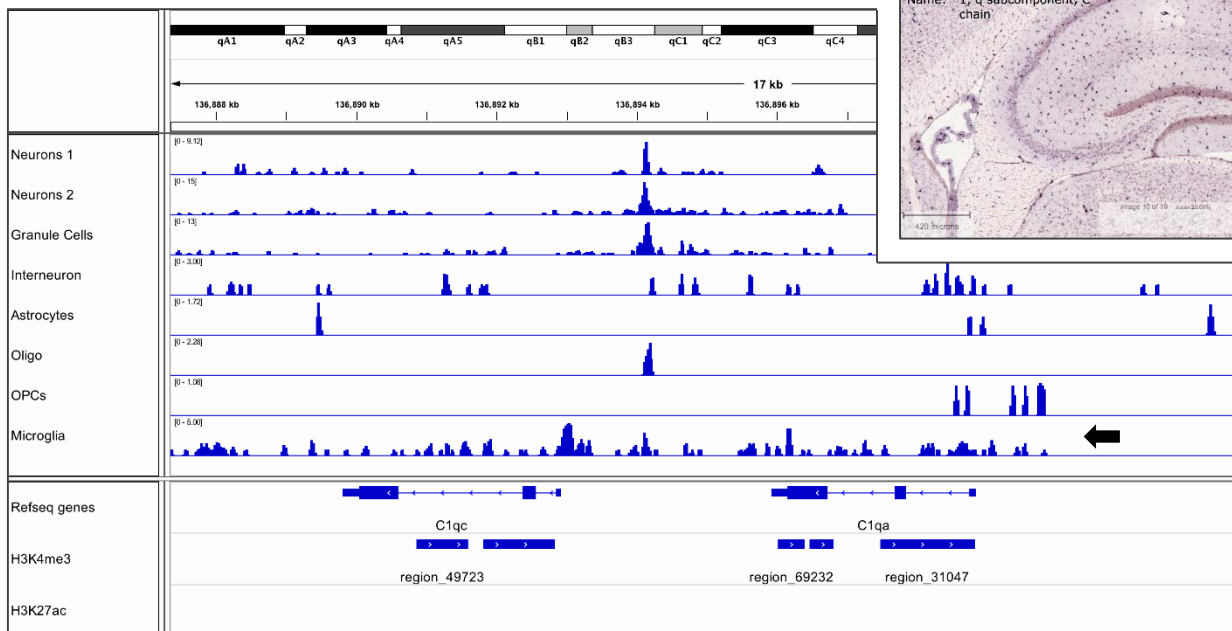



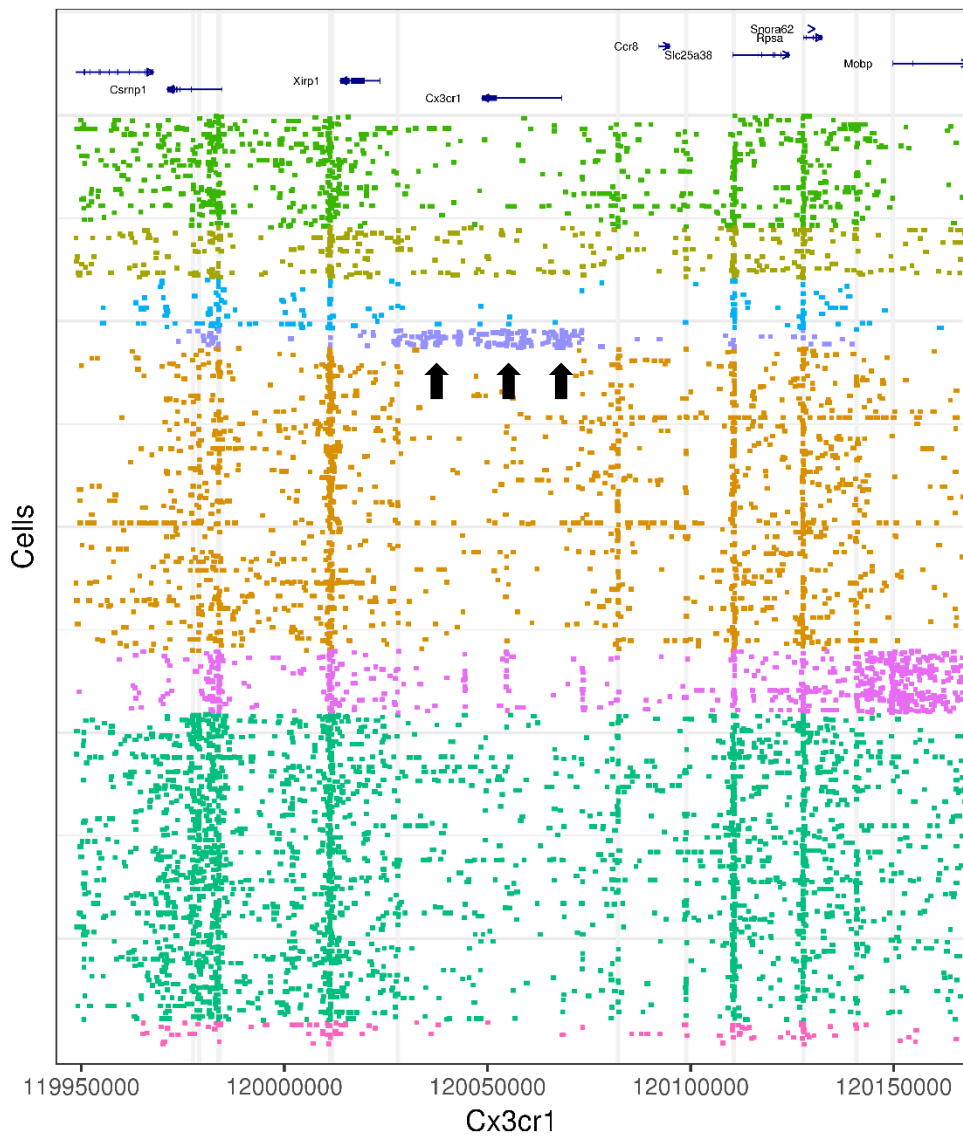

# J) *Cx3cr1* (Microglia)

PMID: 25258010  
Glia. 2015 Apr;63(4):531-548

- AST
- GRN
- INT
- MRG ←
- NR1
- NR2
- OLI
- OPC

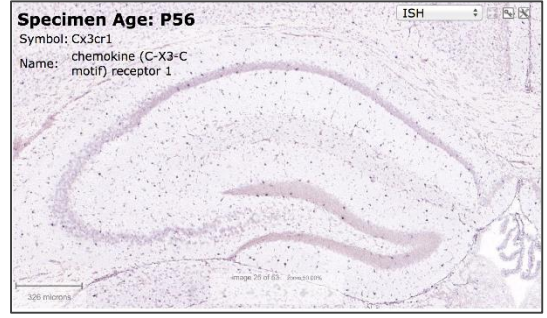

Note: Coronal section (no sagittal available)

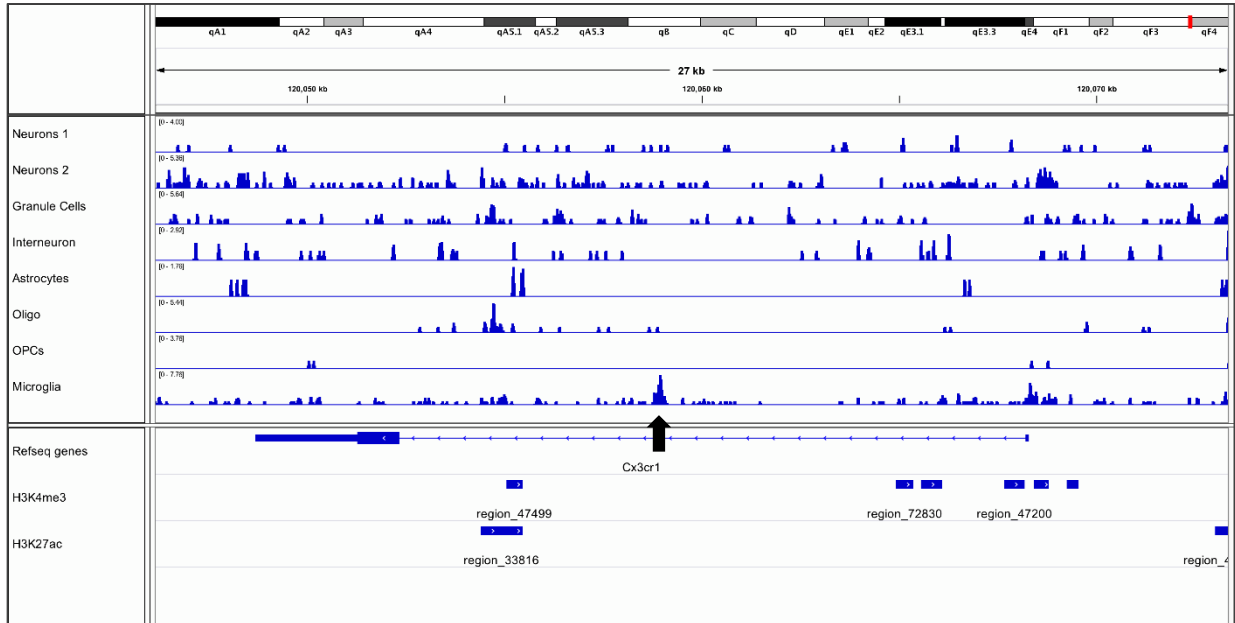

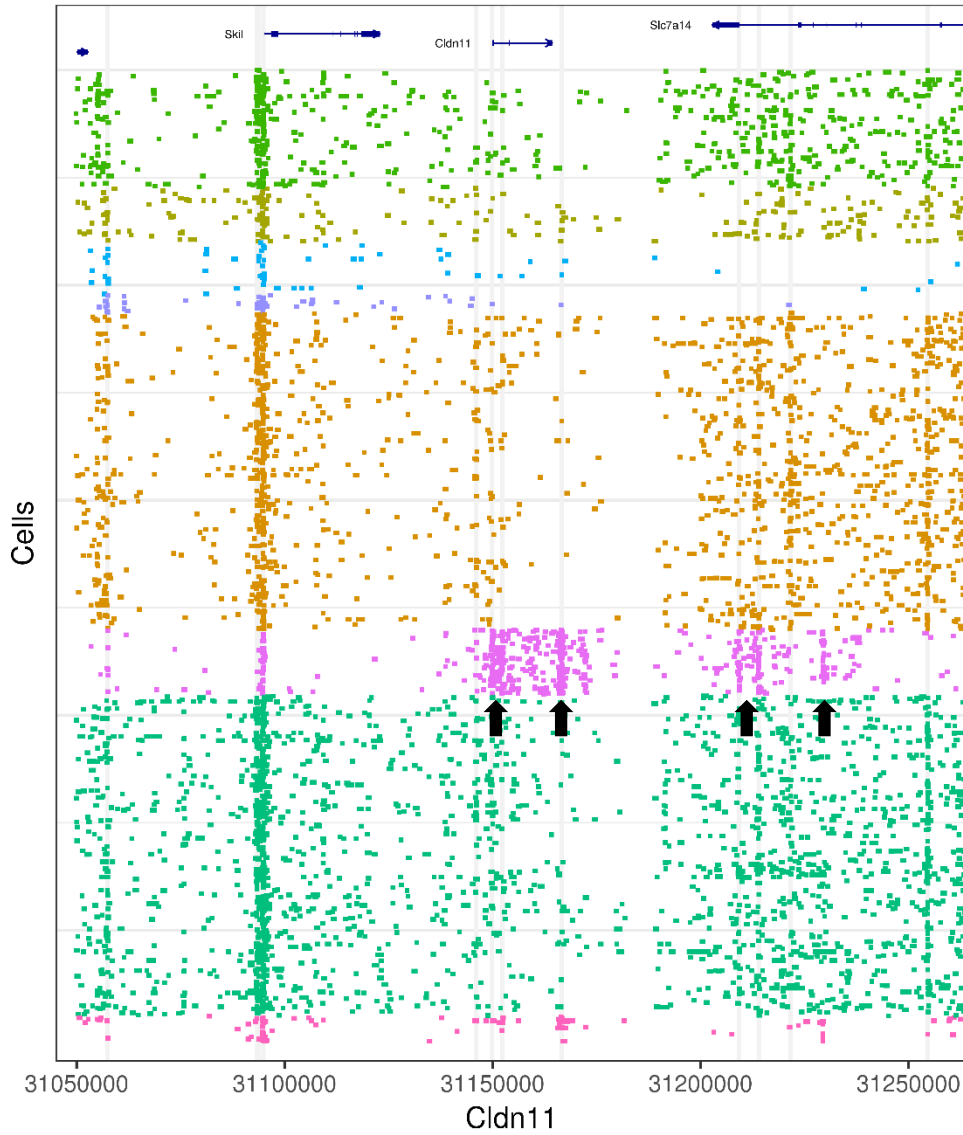

## K) *Cldn11* (Oligodendrocytes)

PMID: 10225958  
J Cell Biol. 1999 May 3;145(3):579-88

- AST
- GRN
- INT
- MRG
- NR1
- NR2
- OLI ←
- OPC

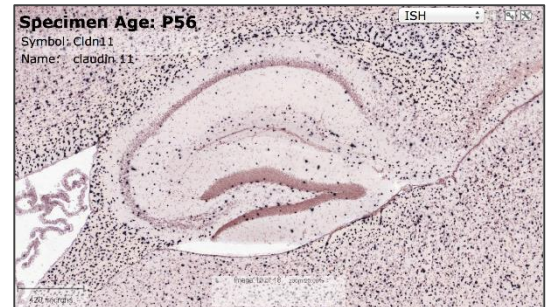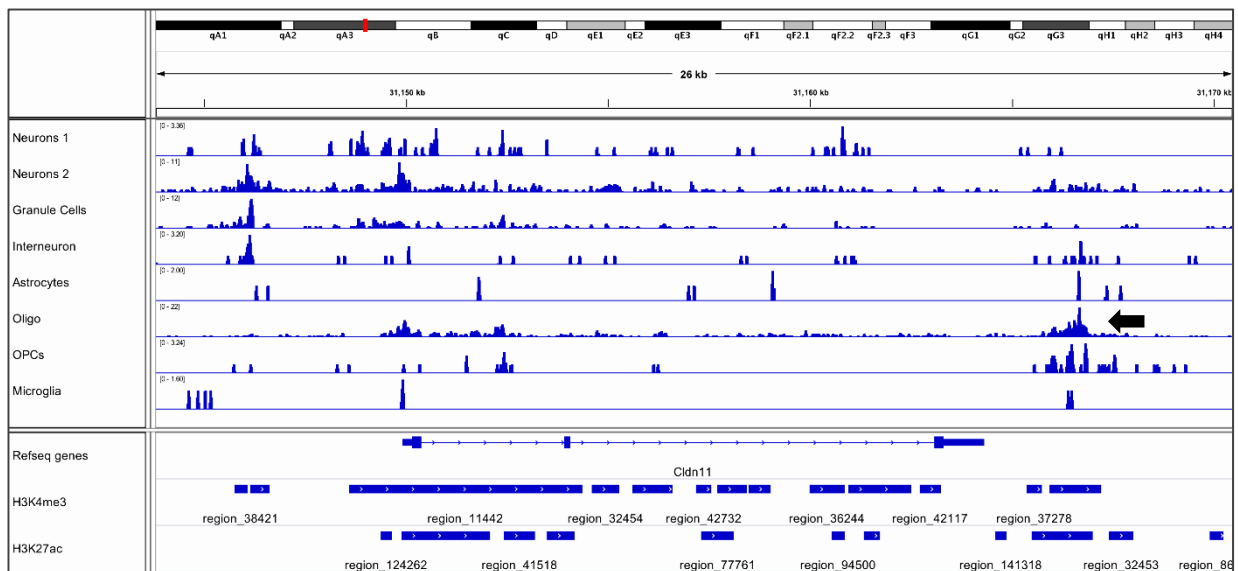

# L) *Mog* (Oligodendrocytes)

PMID: 2649509

J Neuroimmunol. 1989 May;22(3):169-76.

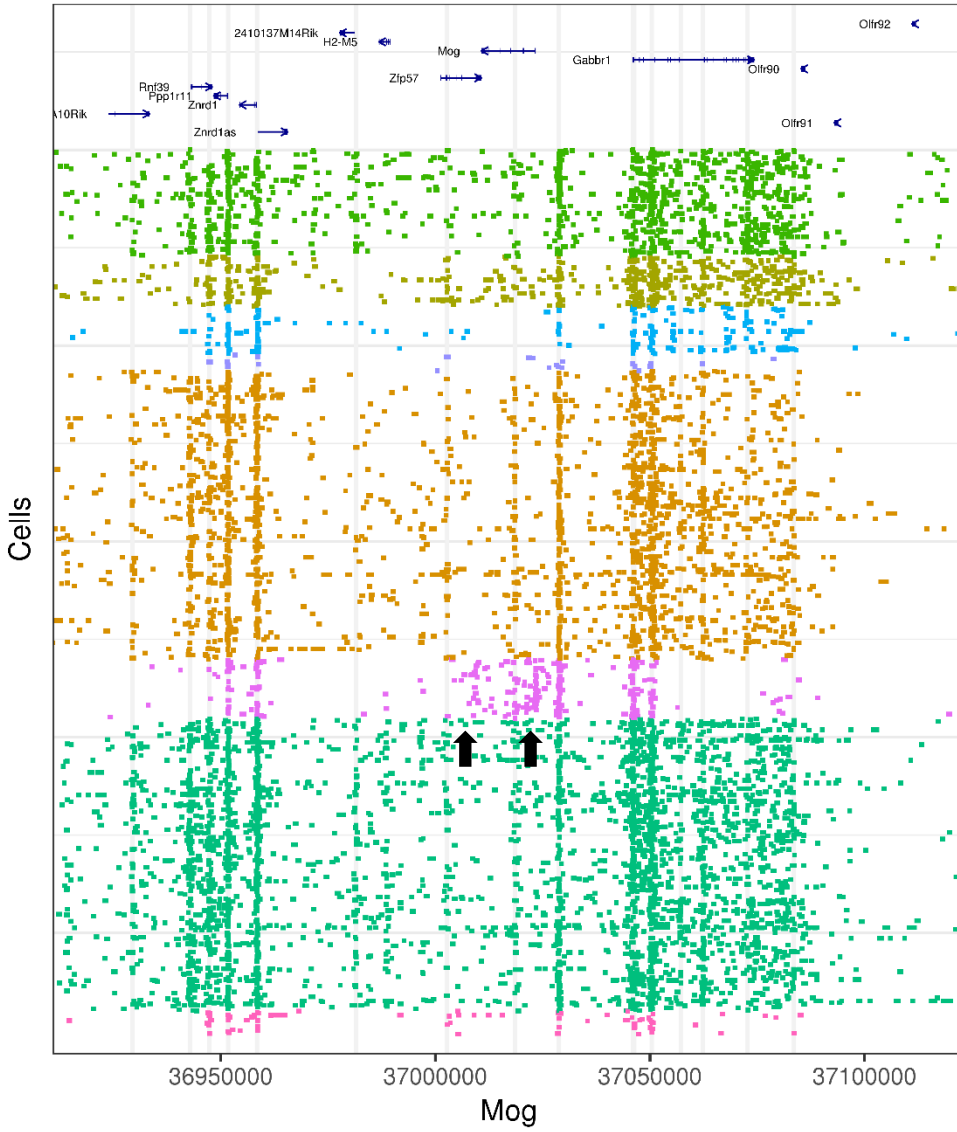

- AST
- GRN
- INT
- MRG
- NR1
- NR2
- OLI ←
- OPC

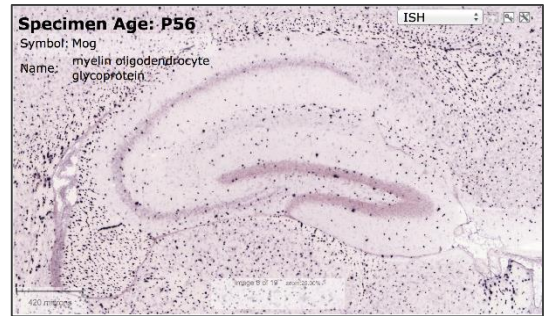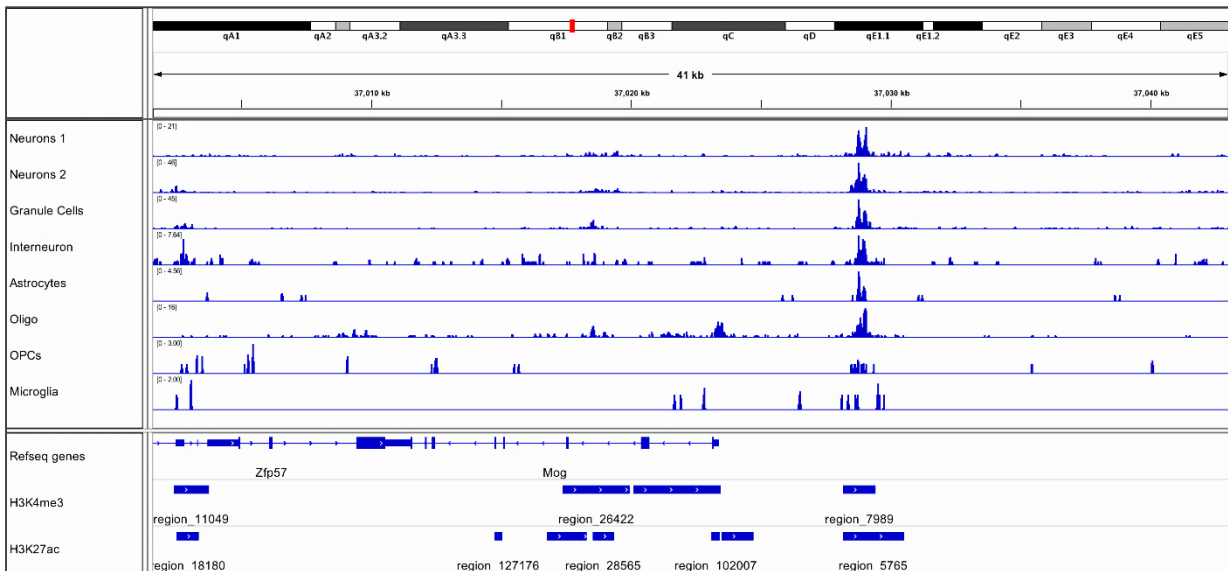

# M) *Mobp* (Oligodendrocytes)

PMID: 17065439

J Neurosci. 2006 Oct 25;26(43):10967-83.

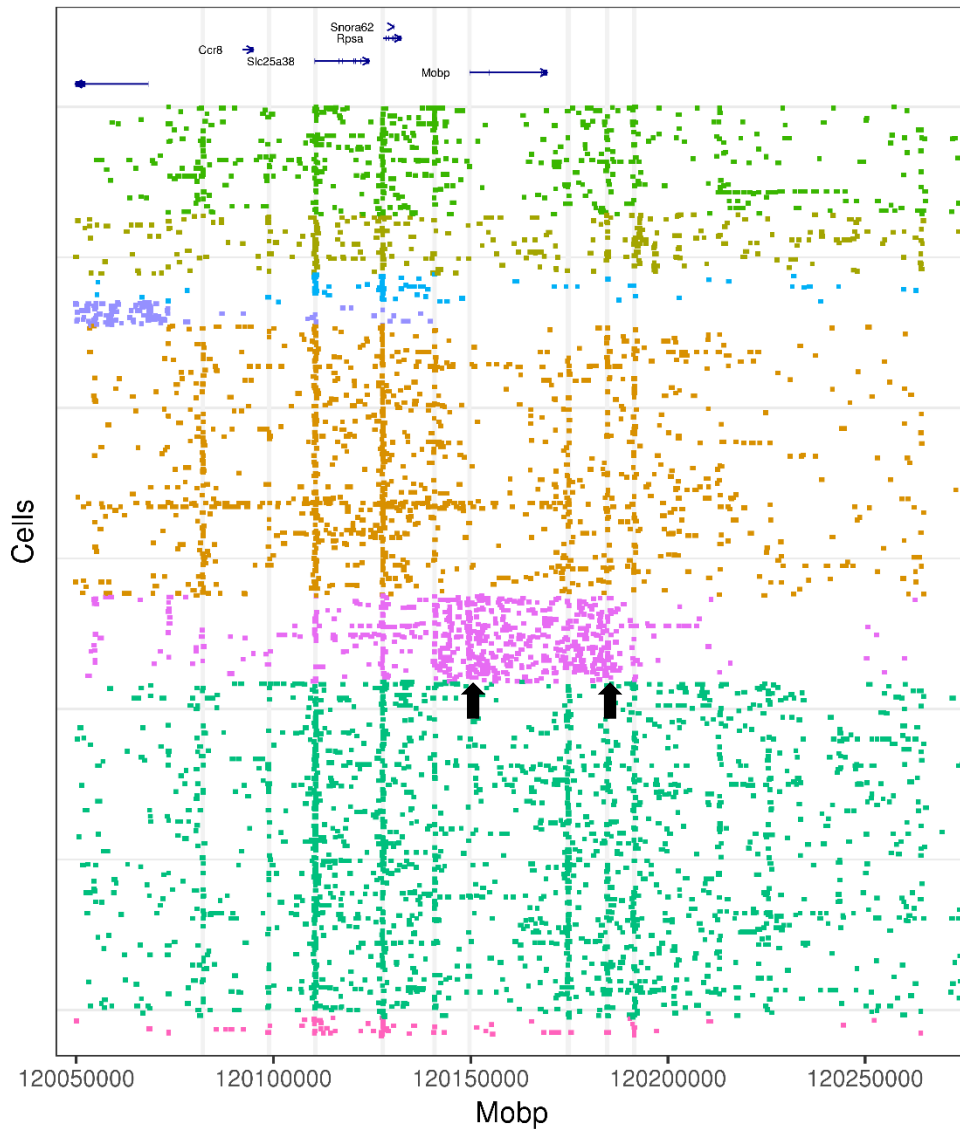

- AST
- GRN
- INT
- MRG
- NR1
- NR2
- OLI ←
- OPC

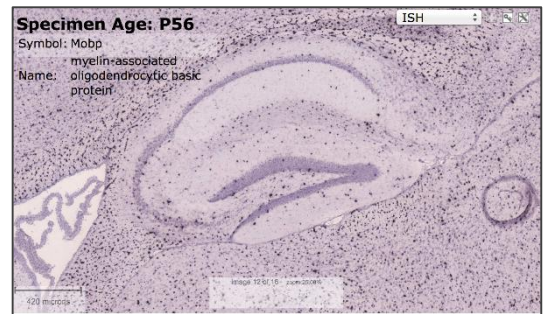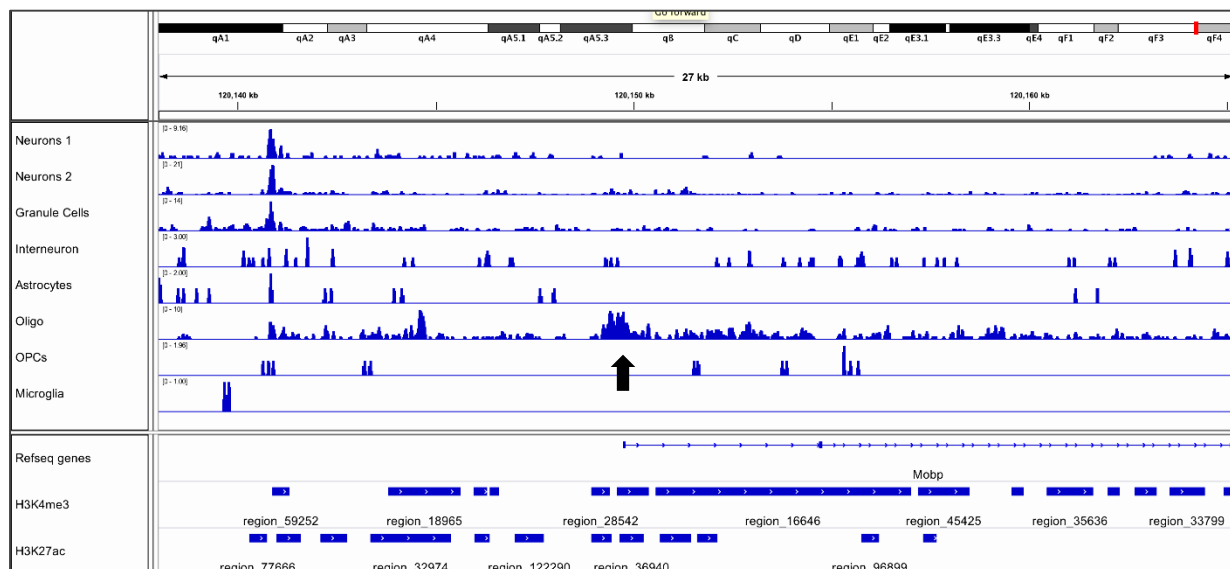

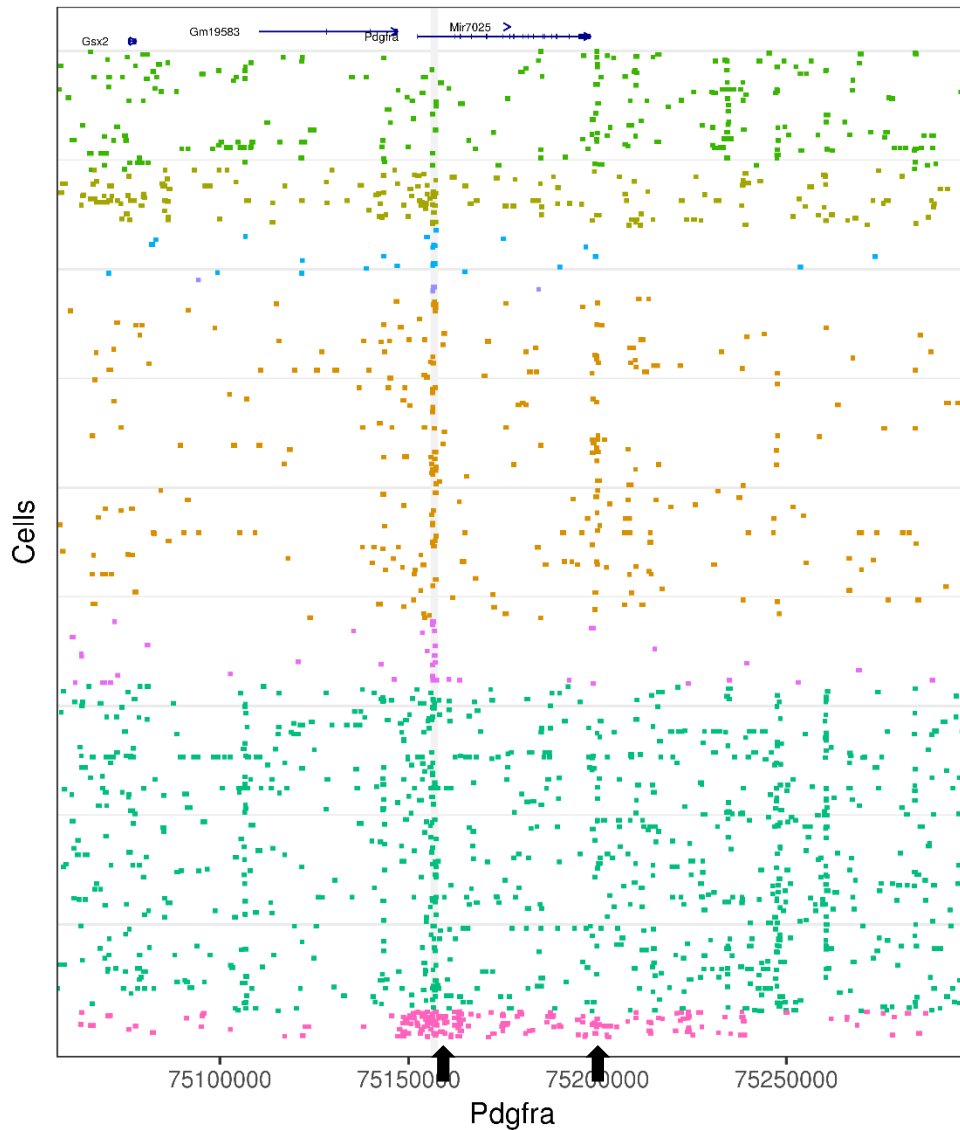

## N) *Pdgfra* (Oligodendrocyte Progenitor Cells)

PMID: 18849983  
 Nat Neurosci. 2008 Dec;11(12):1392-401.  
 doi: 10.1038/nn.2220

- AST
- GRN
- INT
- MRG
- NR1
- NR2
- OLI
- OPC ←

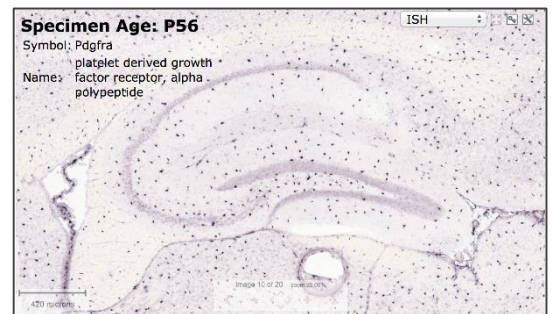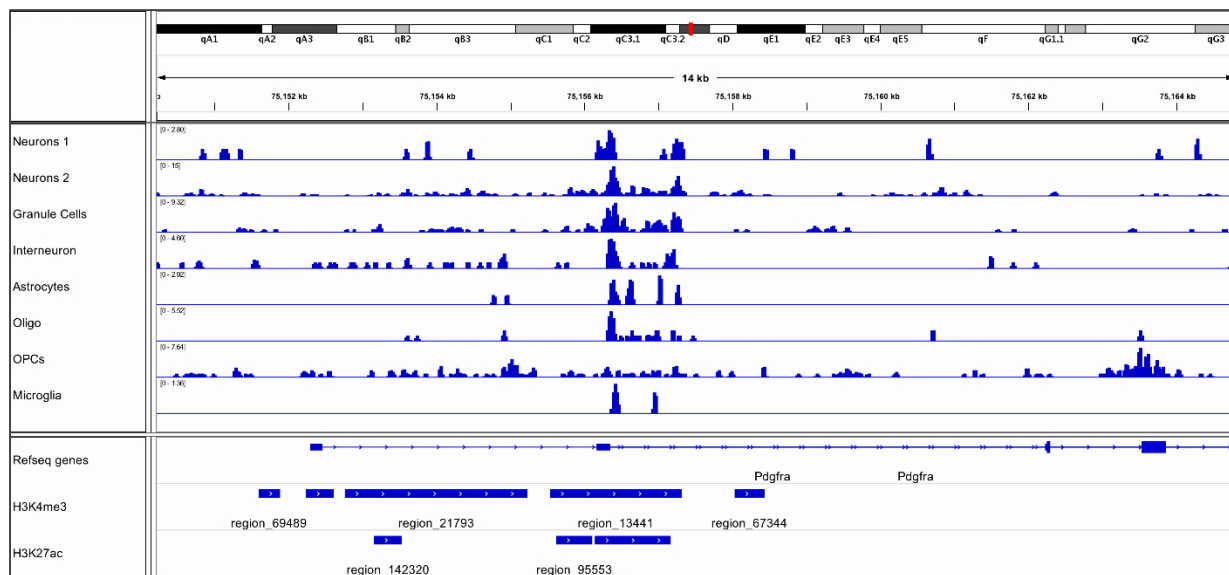

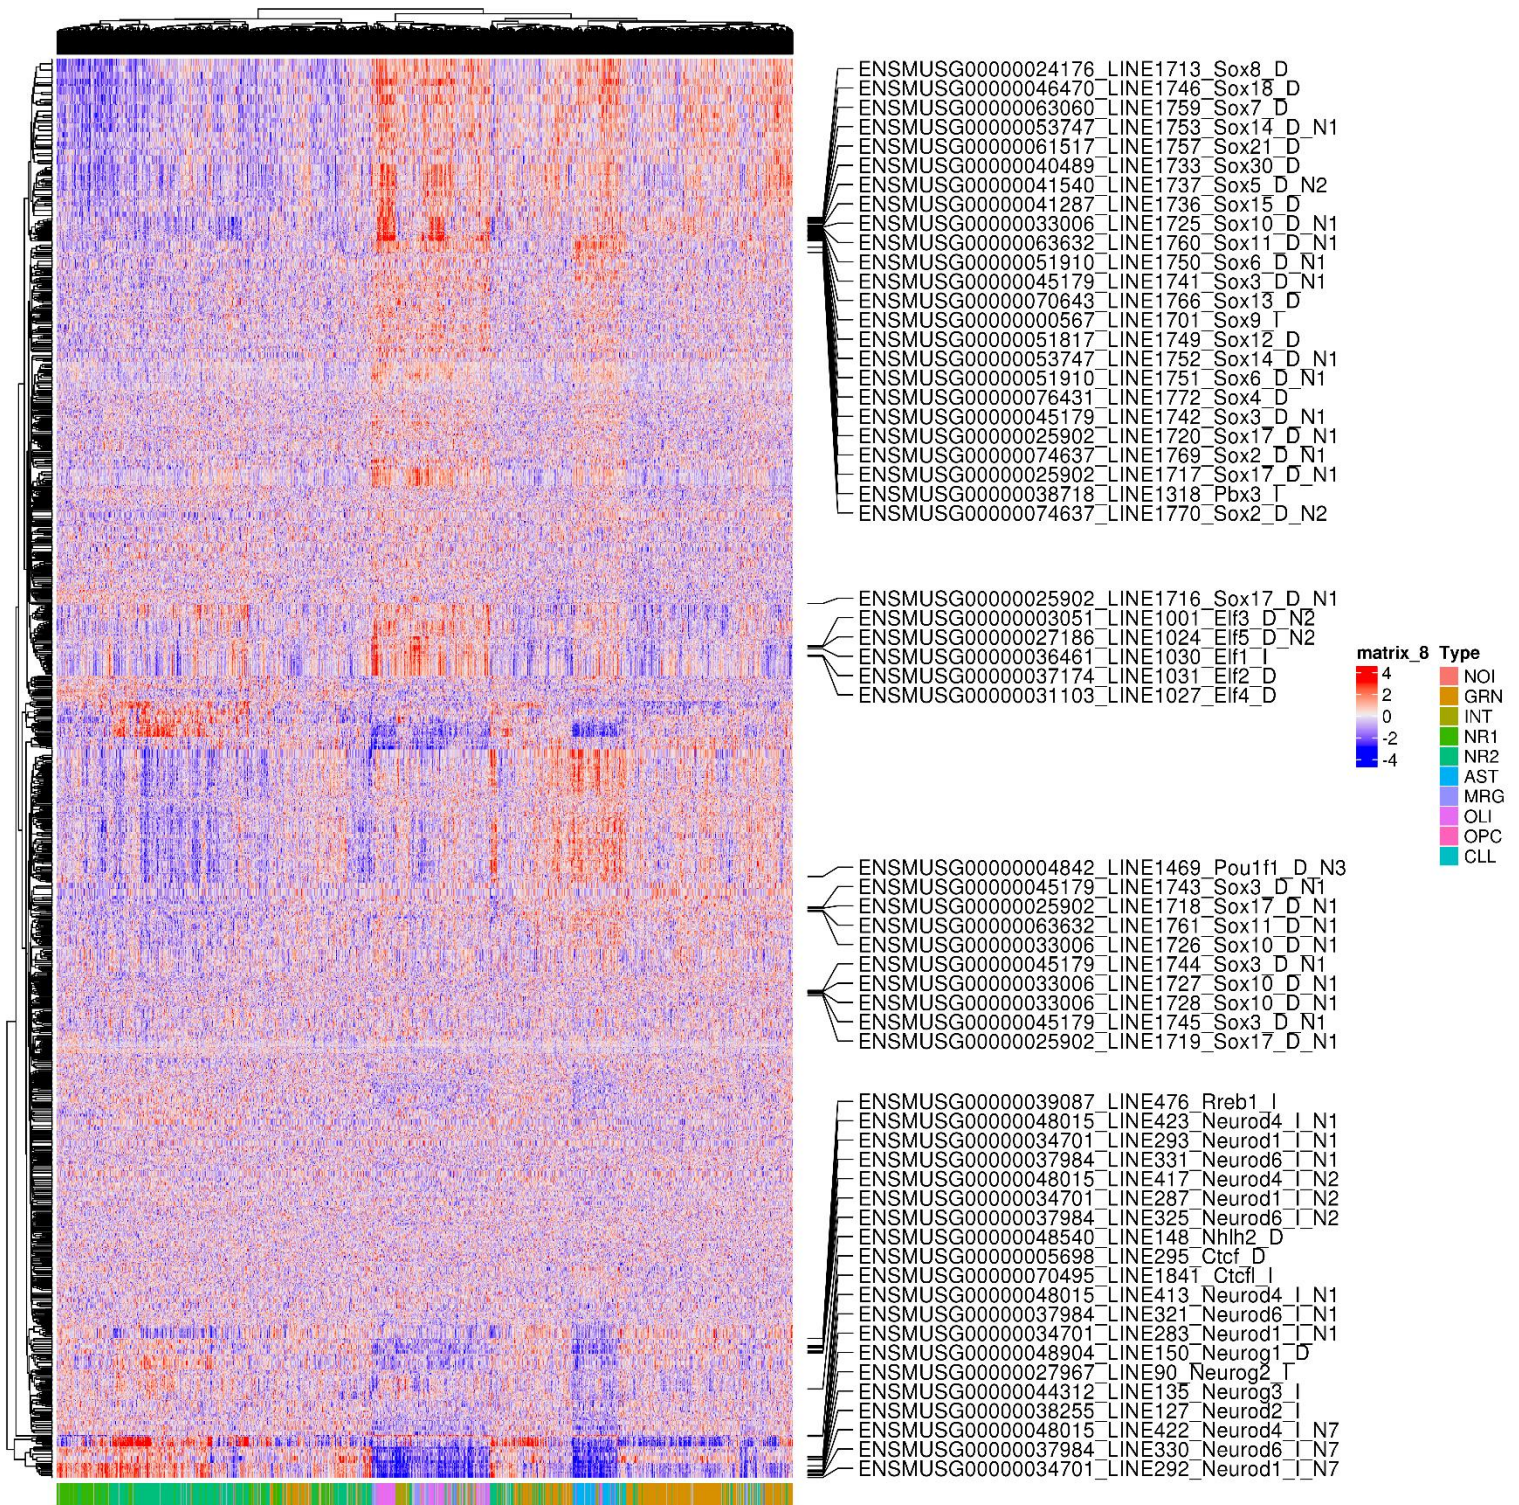

**Supplemental Figure 4: ChromVAR motif deviations heatmap**

Bottom axis corresponds to cell type, highlighted motifs correspond to important cell type specific factors.

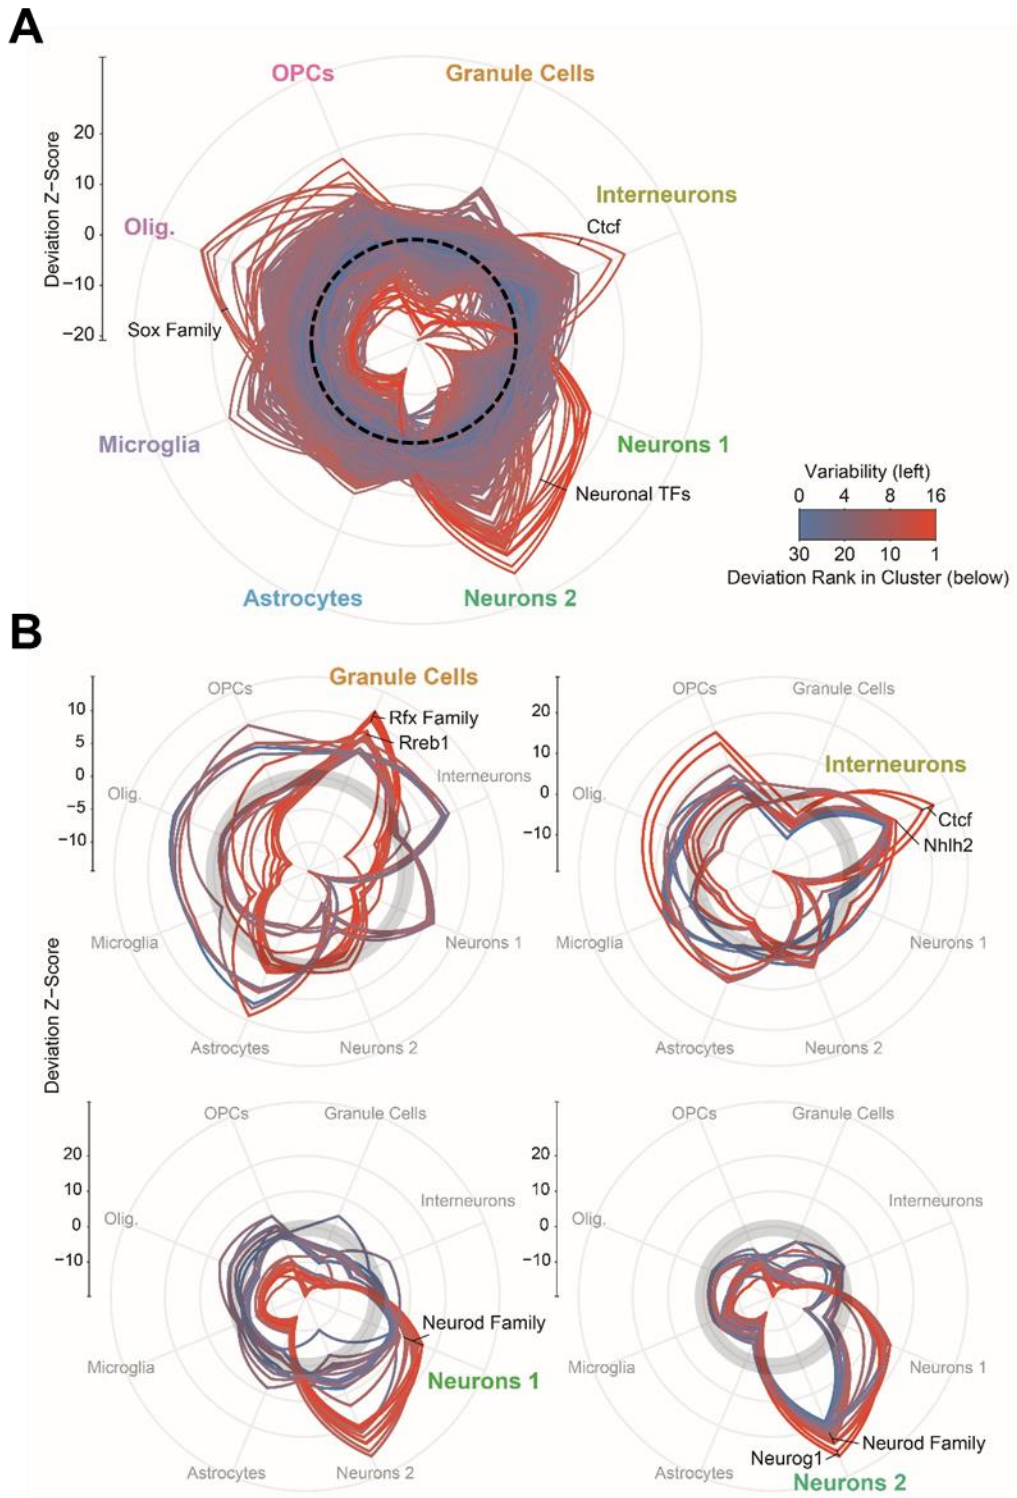

## B (cont)

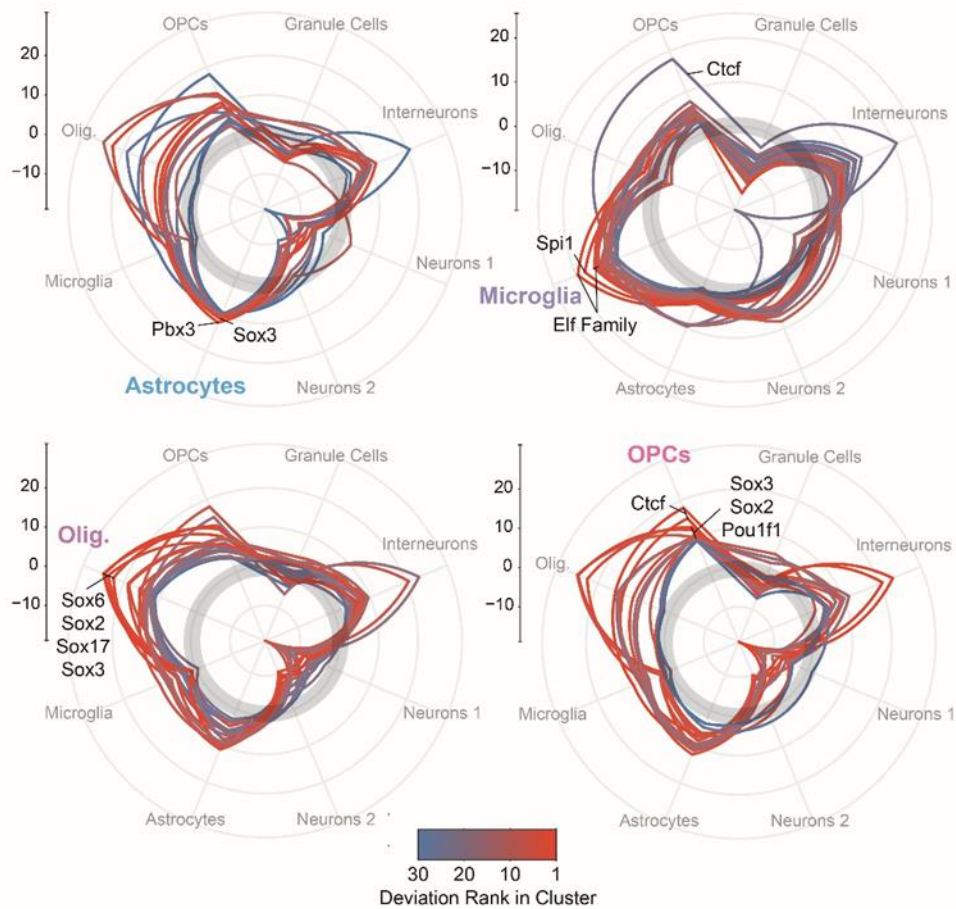

### Supplemental Figure 5: Global motif profiles for cell types

A) *ChromVAR* mean deviation scores (y-axis) for each motif for each cell type. Color indicates the variability score for the motif as reported by *ChromVAR*. The black dashed line is at 0, i.e. the mean. B) Deviation scores (y-axis) from *ChromVAR* for the top 30 motifs with the highest deviation z-scores as shown in A. Color indicates the ranking within the cluster. Gray shaded line is at 0, i.e. the mean. Polygon plots were utilized to confer similar shapes of top motif accessibility between clusters.



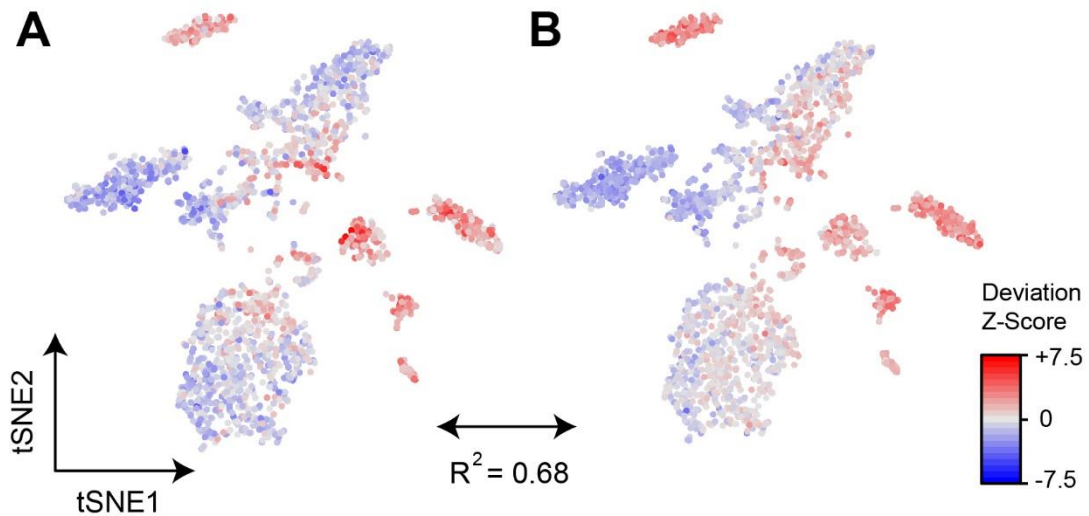

**Supplemental Figure 6: Comparison of CTCF motif and ChIP-seq deviations**

A) *ChromVAR* analysis of global accessibility using motif locations in the genome. B) *ChromVAR* deviation scores for CTCF ChIP-seq (Sams et al. 2016) peaks. Deviation sets show the same broad trends and show high correlation (Pearson  $R^2 = 0.68$ ).

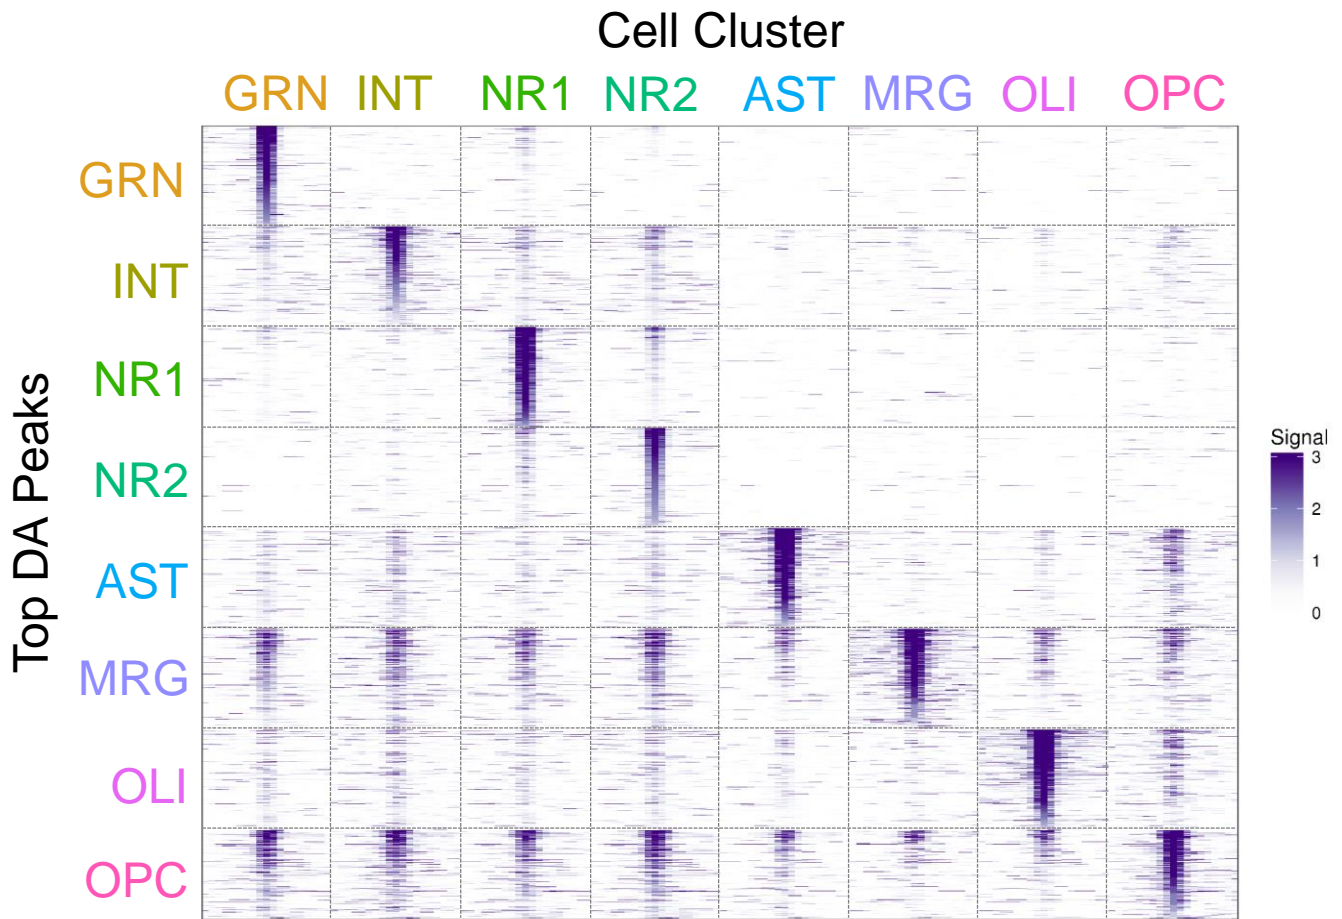

### Supplemental Figure 7: DA Peak ATAC-seq Signal

ATAC-seq signal for the top 1,000 differentially accessible peaks for each cell type are shown as in Fig. 2 but sorted according to peaks with the top signal versus significance of differential accessibility.

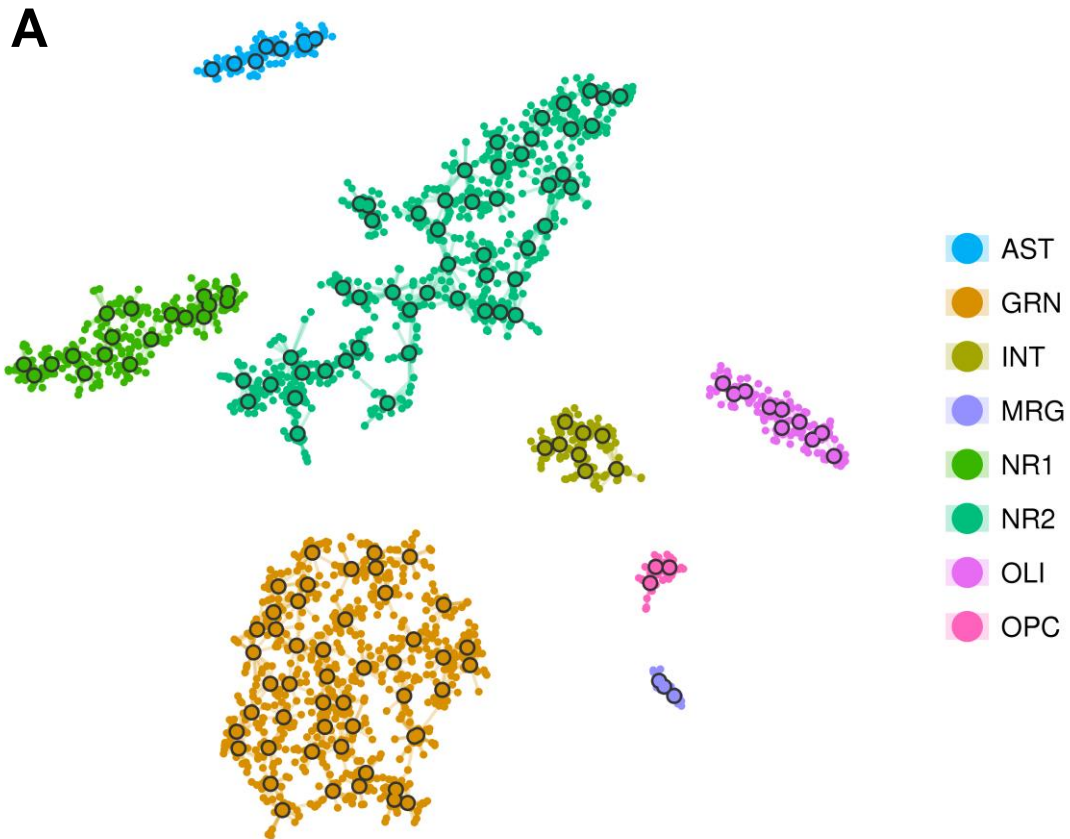

**Supplemental Figure 8: Differentially Accessible Peaks**

A) Scitools aggregate-cells plot showing which cells were grouped into subclusters that serve as replicates into the DA analysis. B-I) The top 10 differentially accessible (Supplemental Table 2, see Methods) peaks corresponding to each cluster are plotted along with the sci-ATAC-seq reads present within the region  $\pm 50,000$  basepairs of the identified DA peak (panel title, centered).

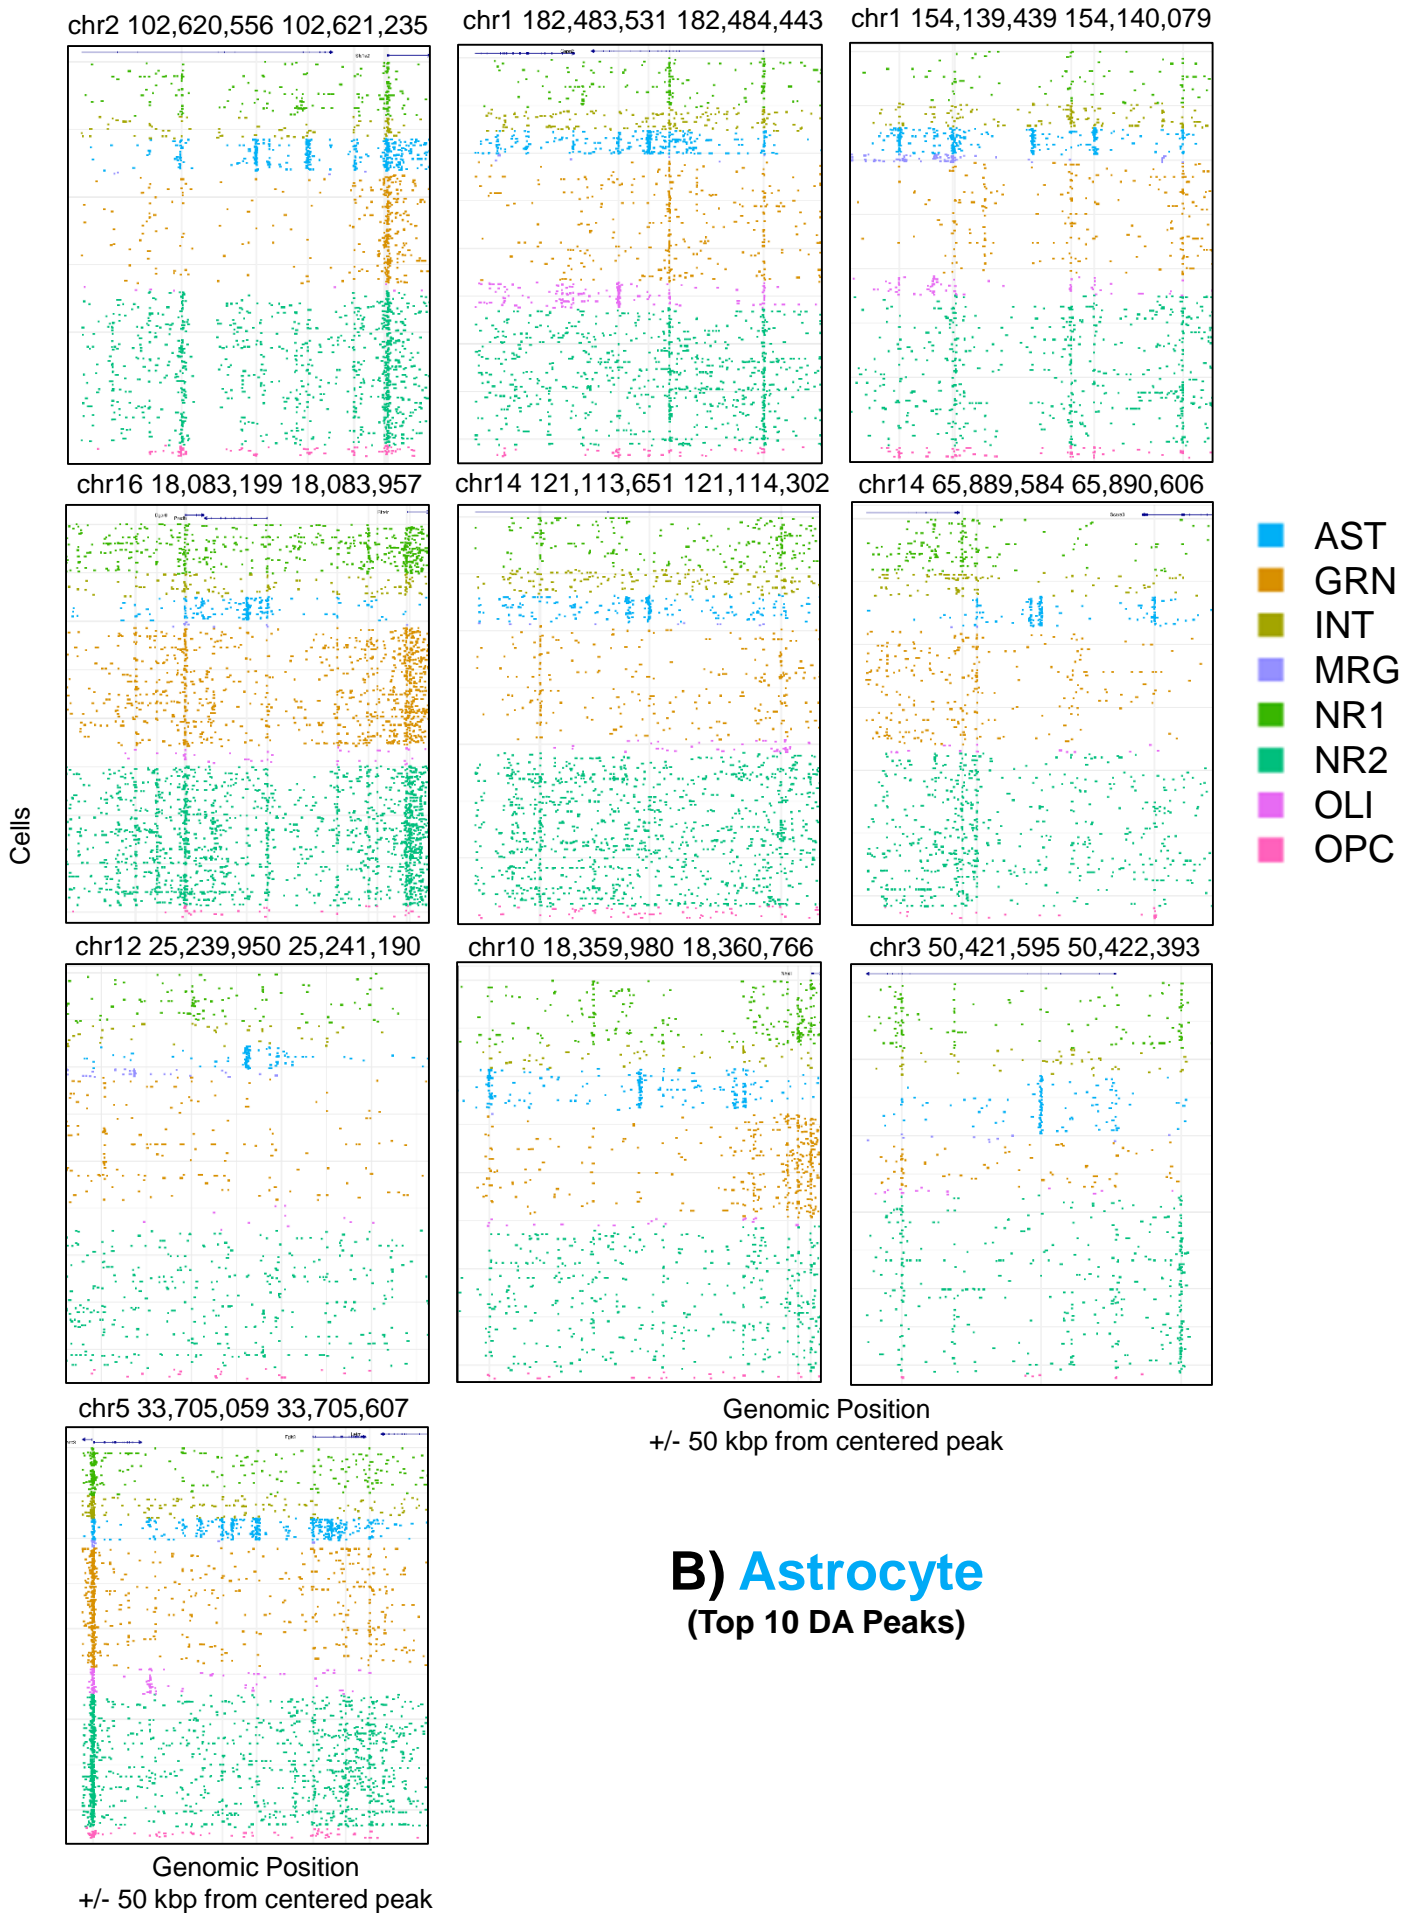

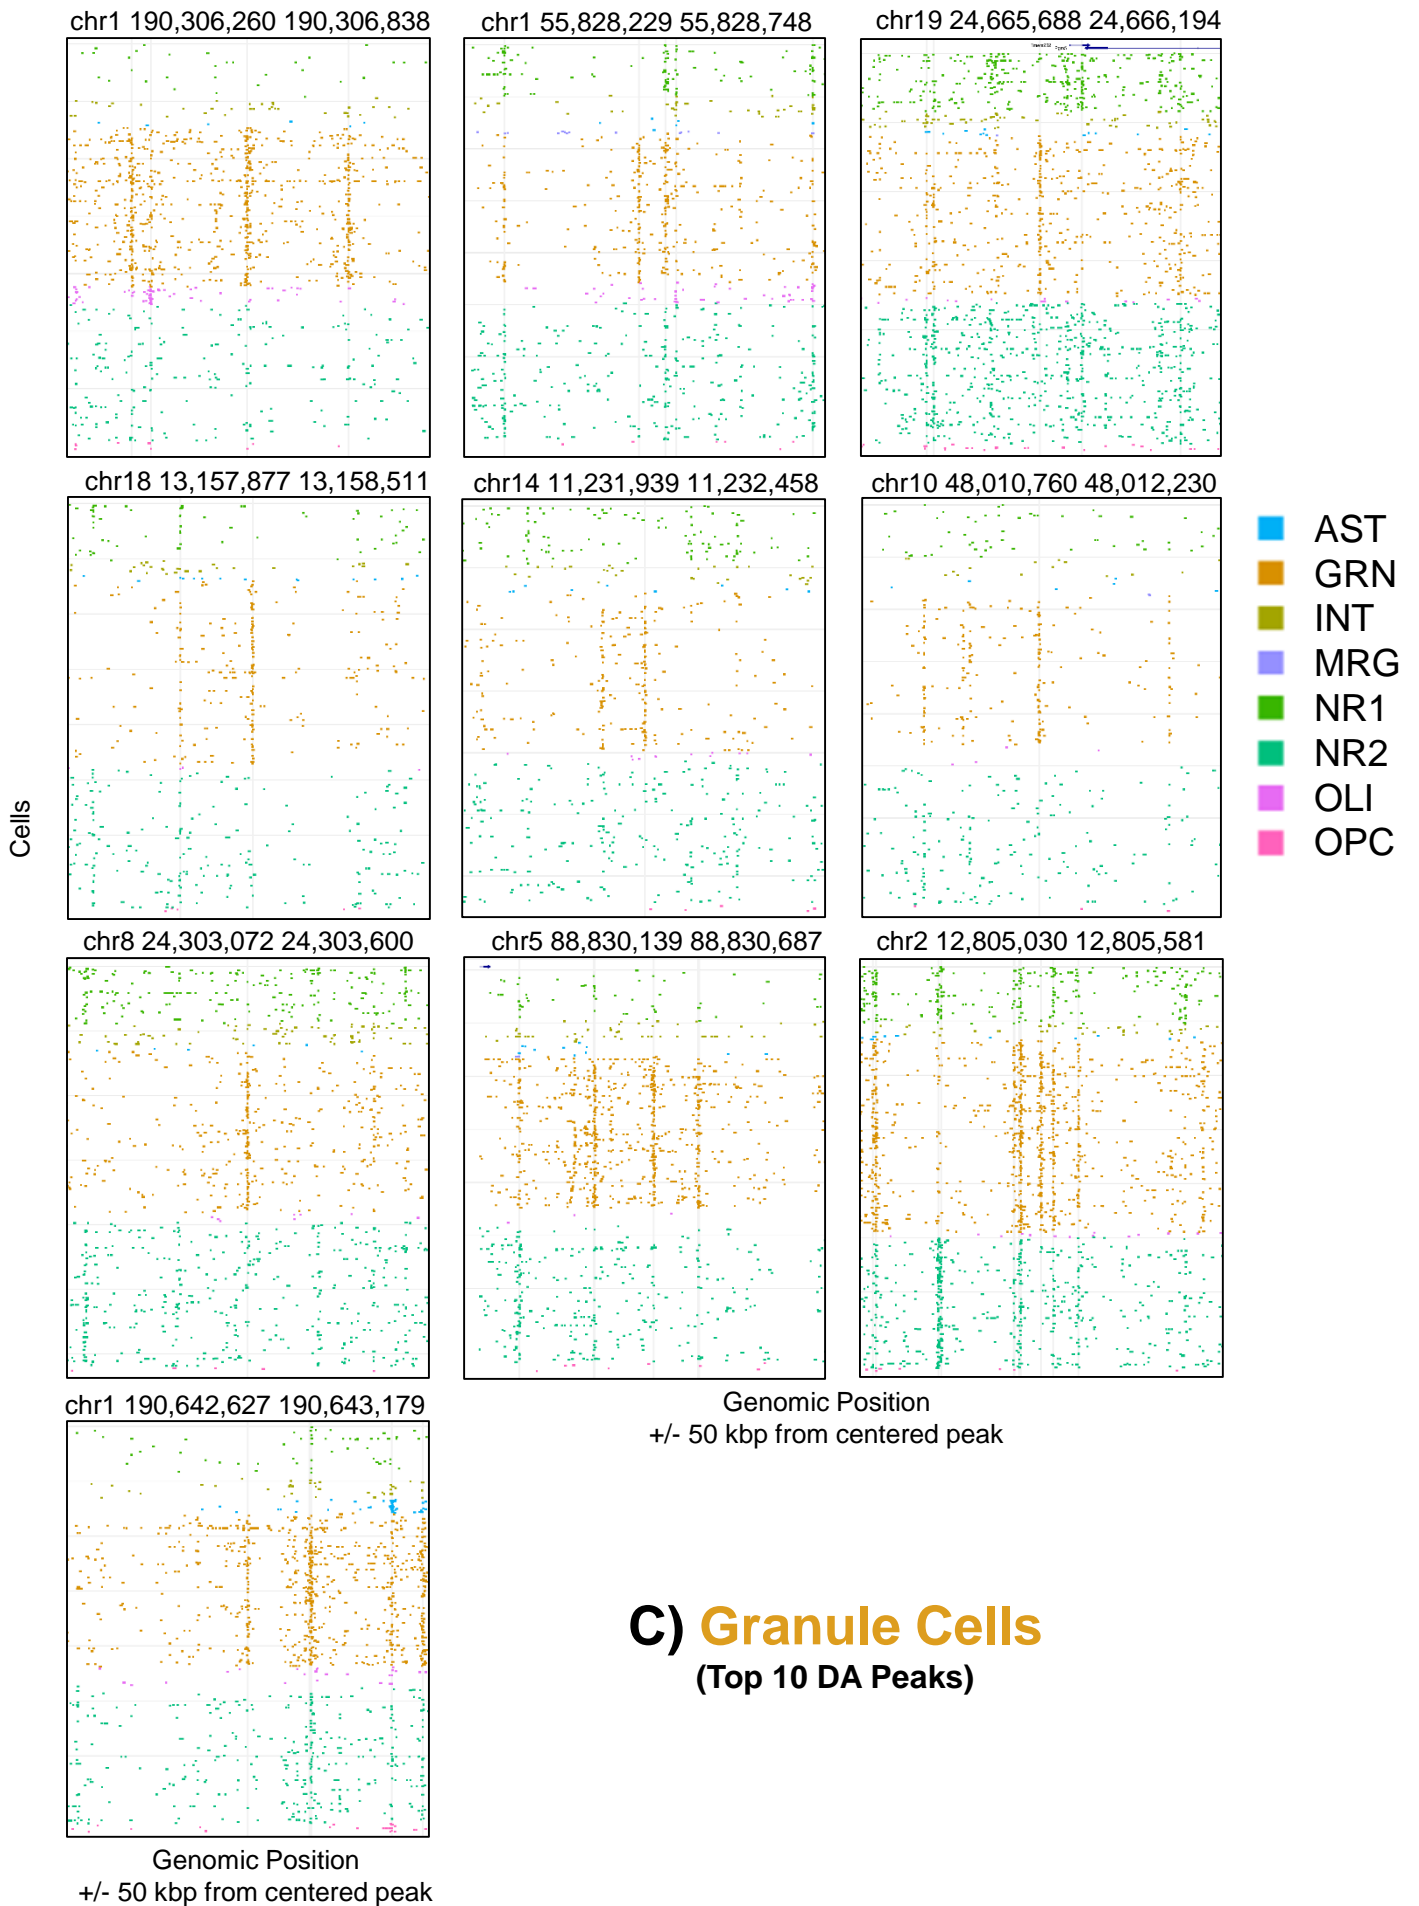

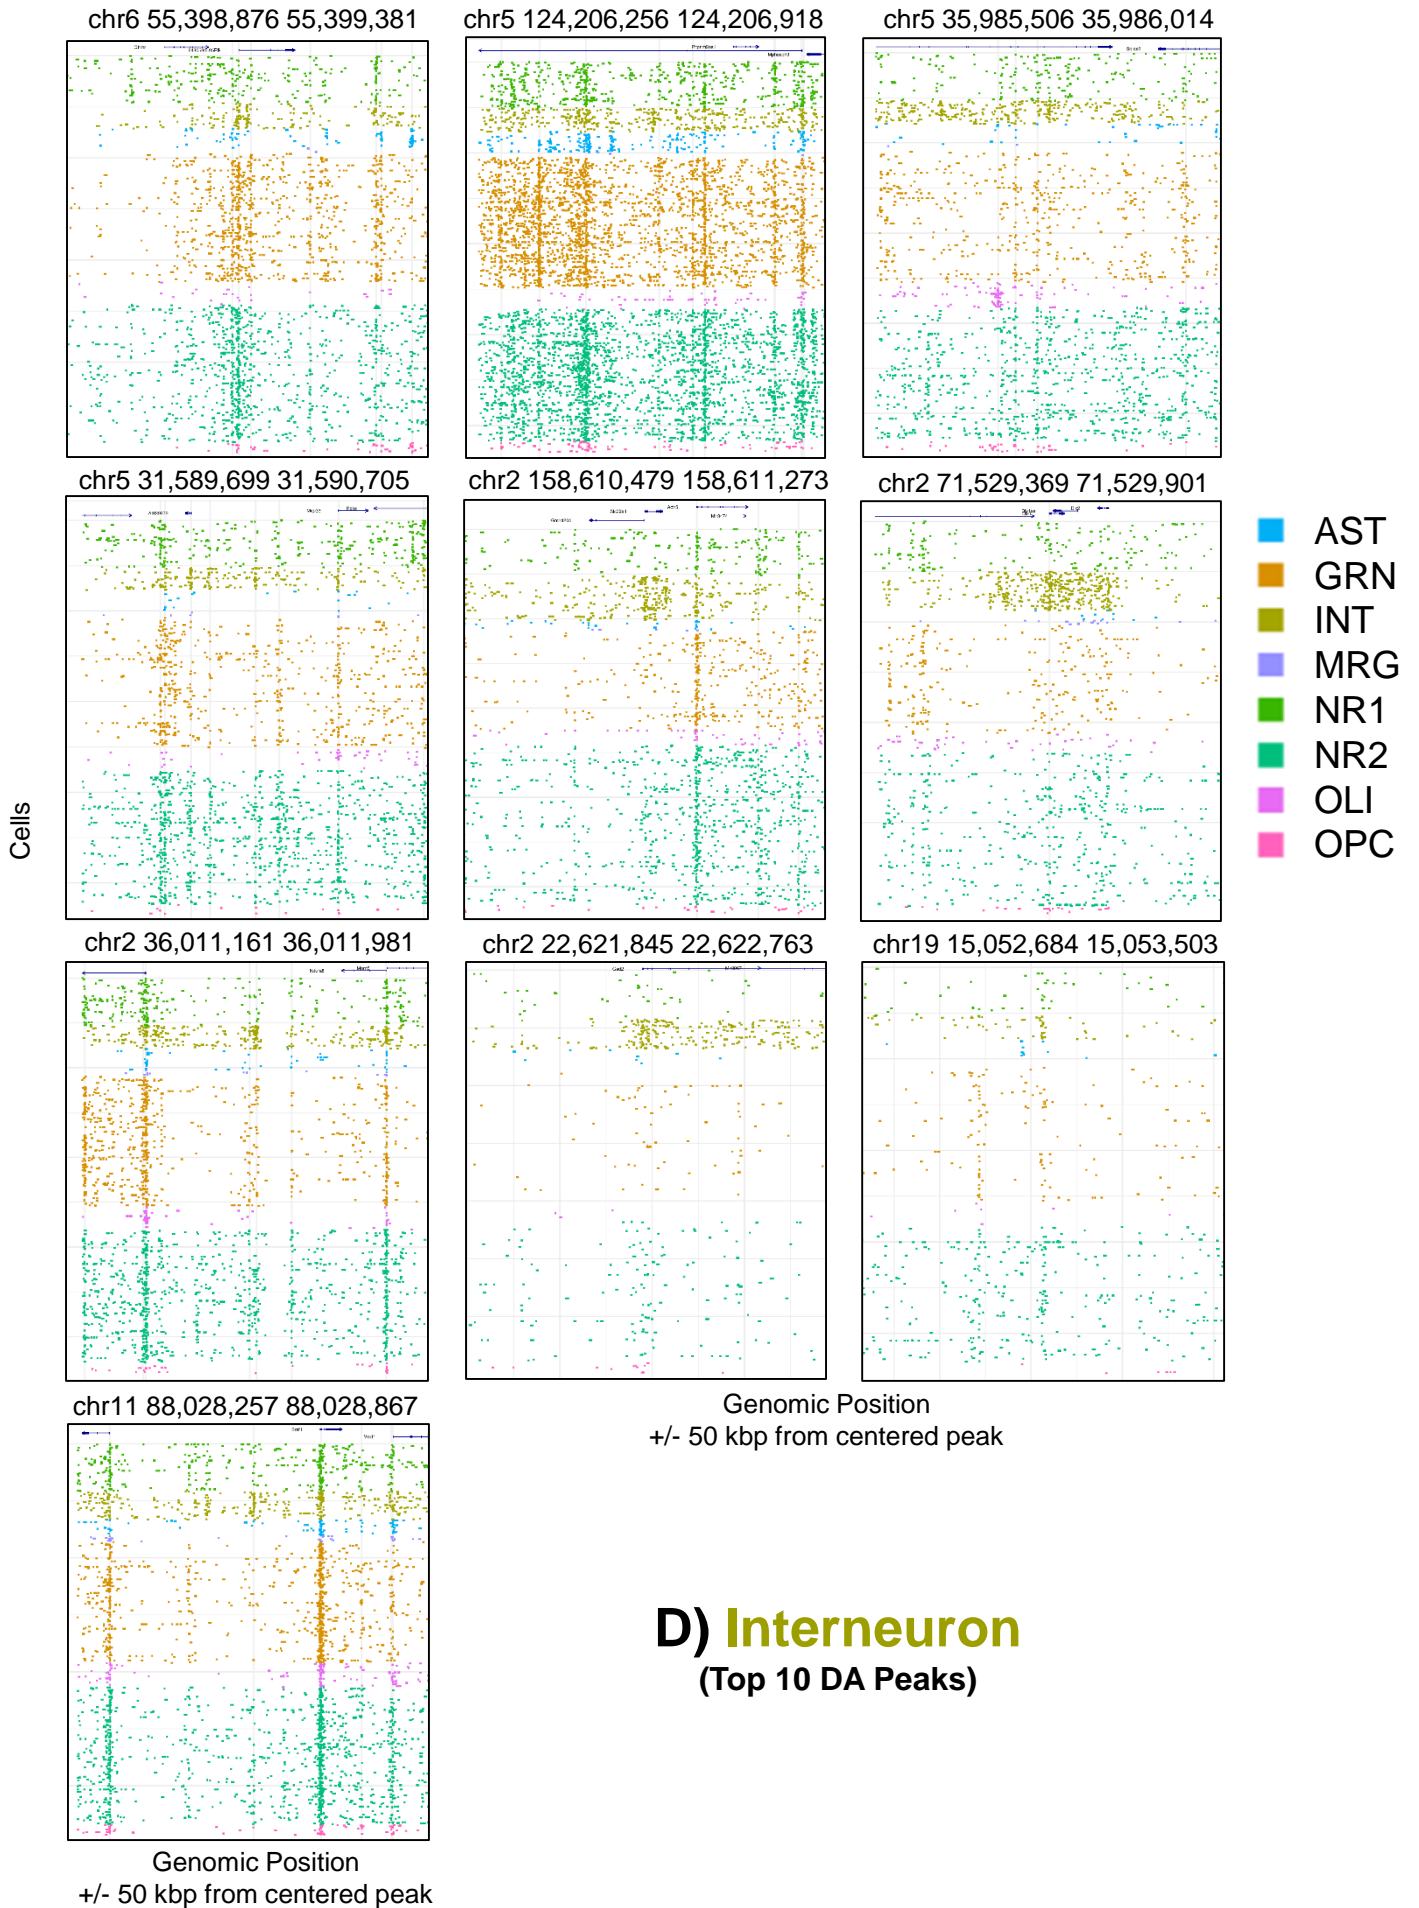

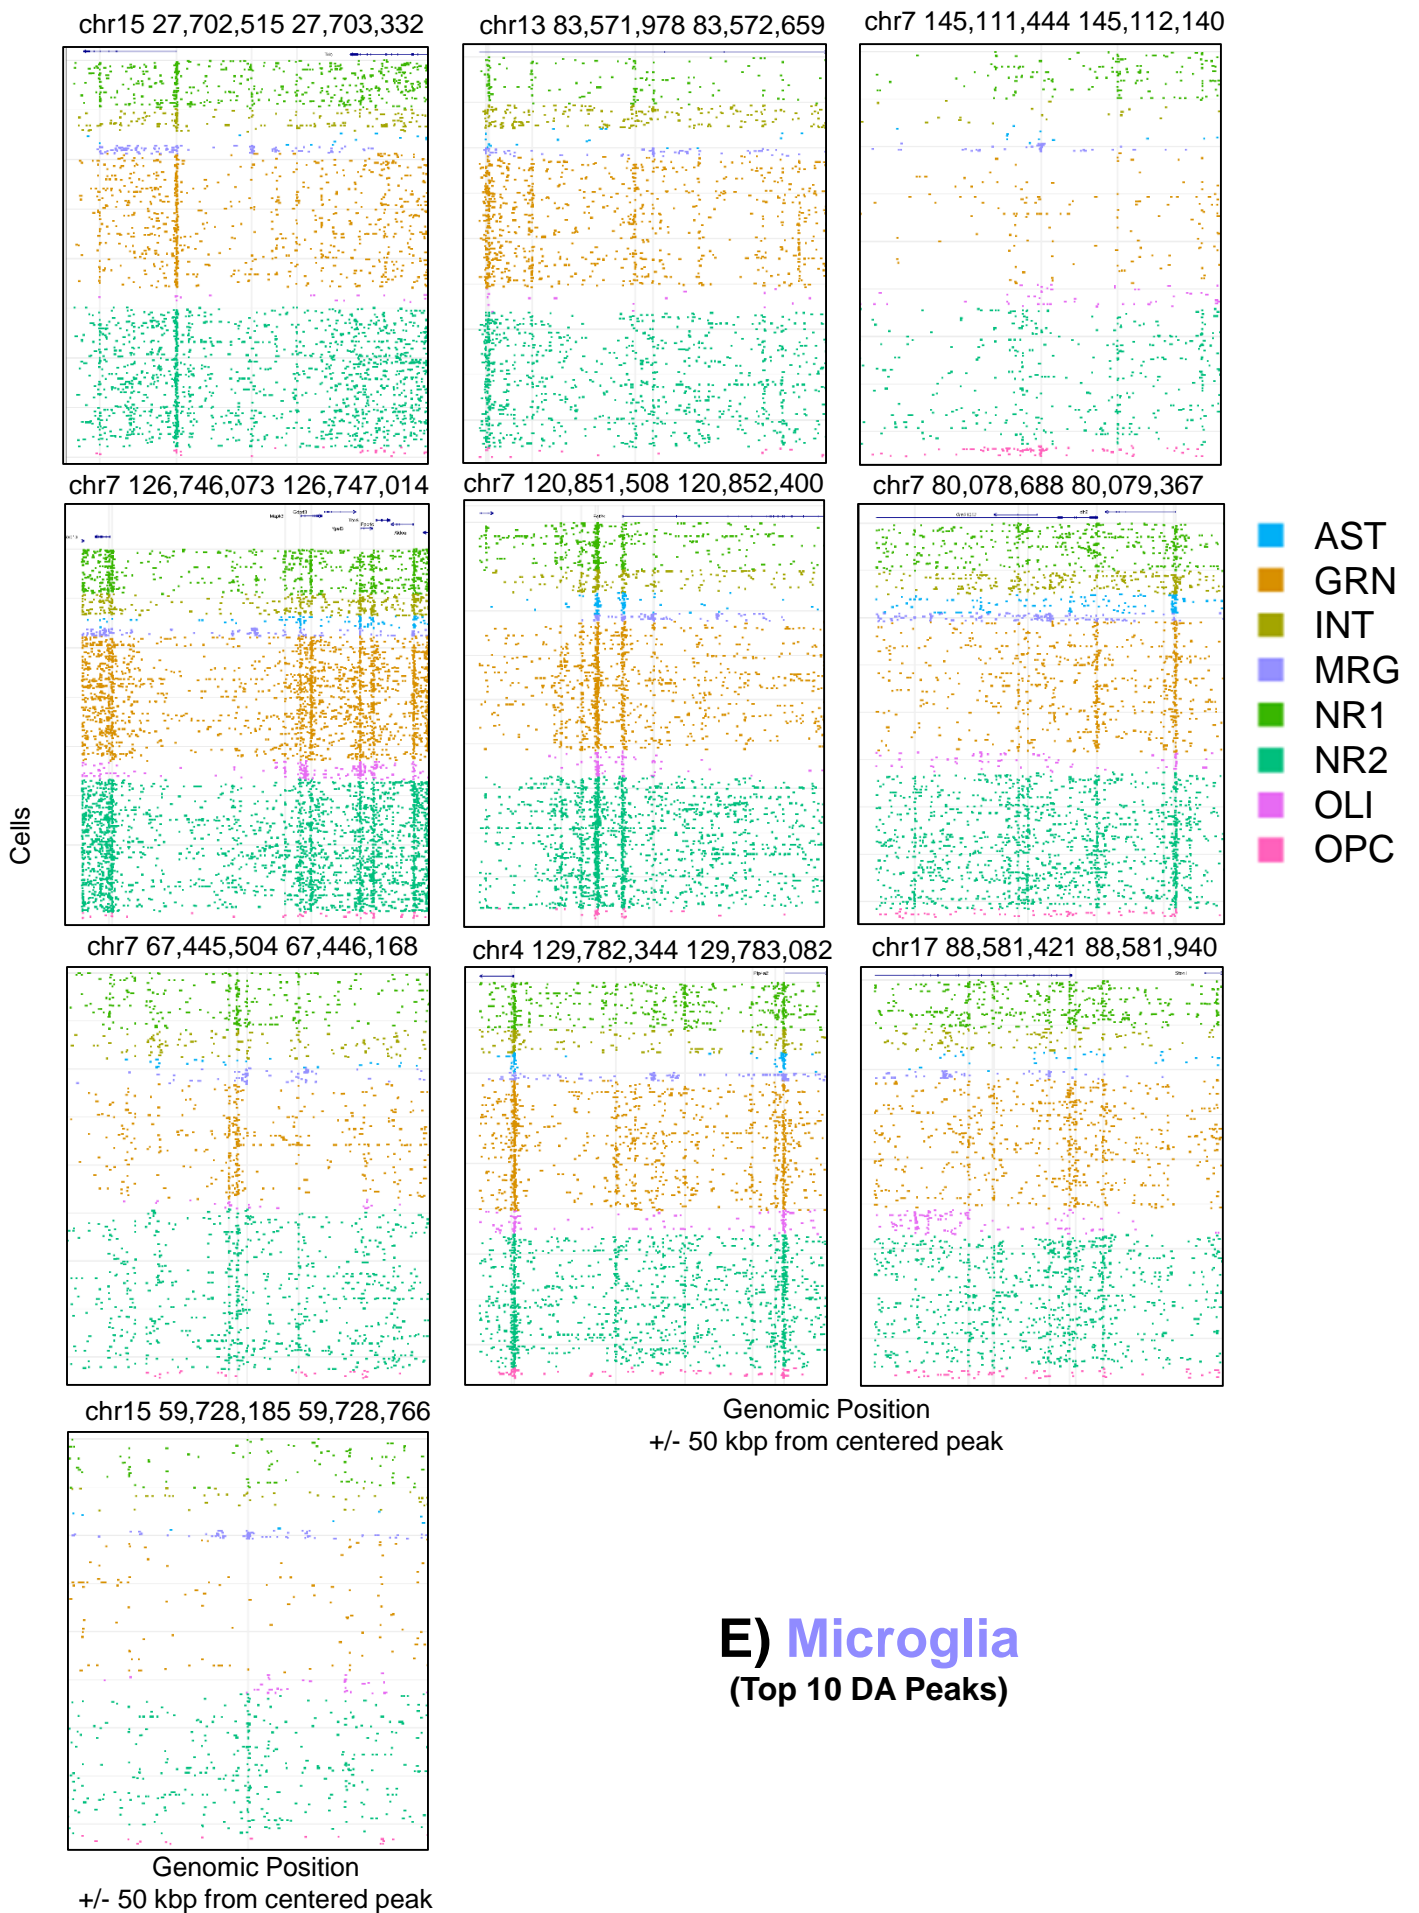

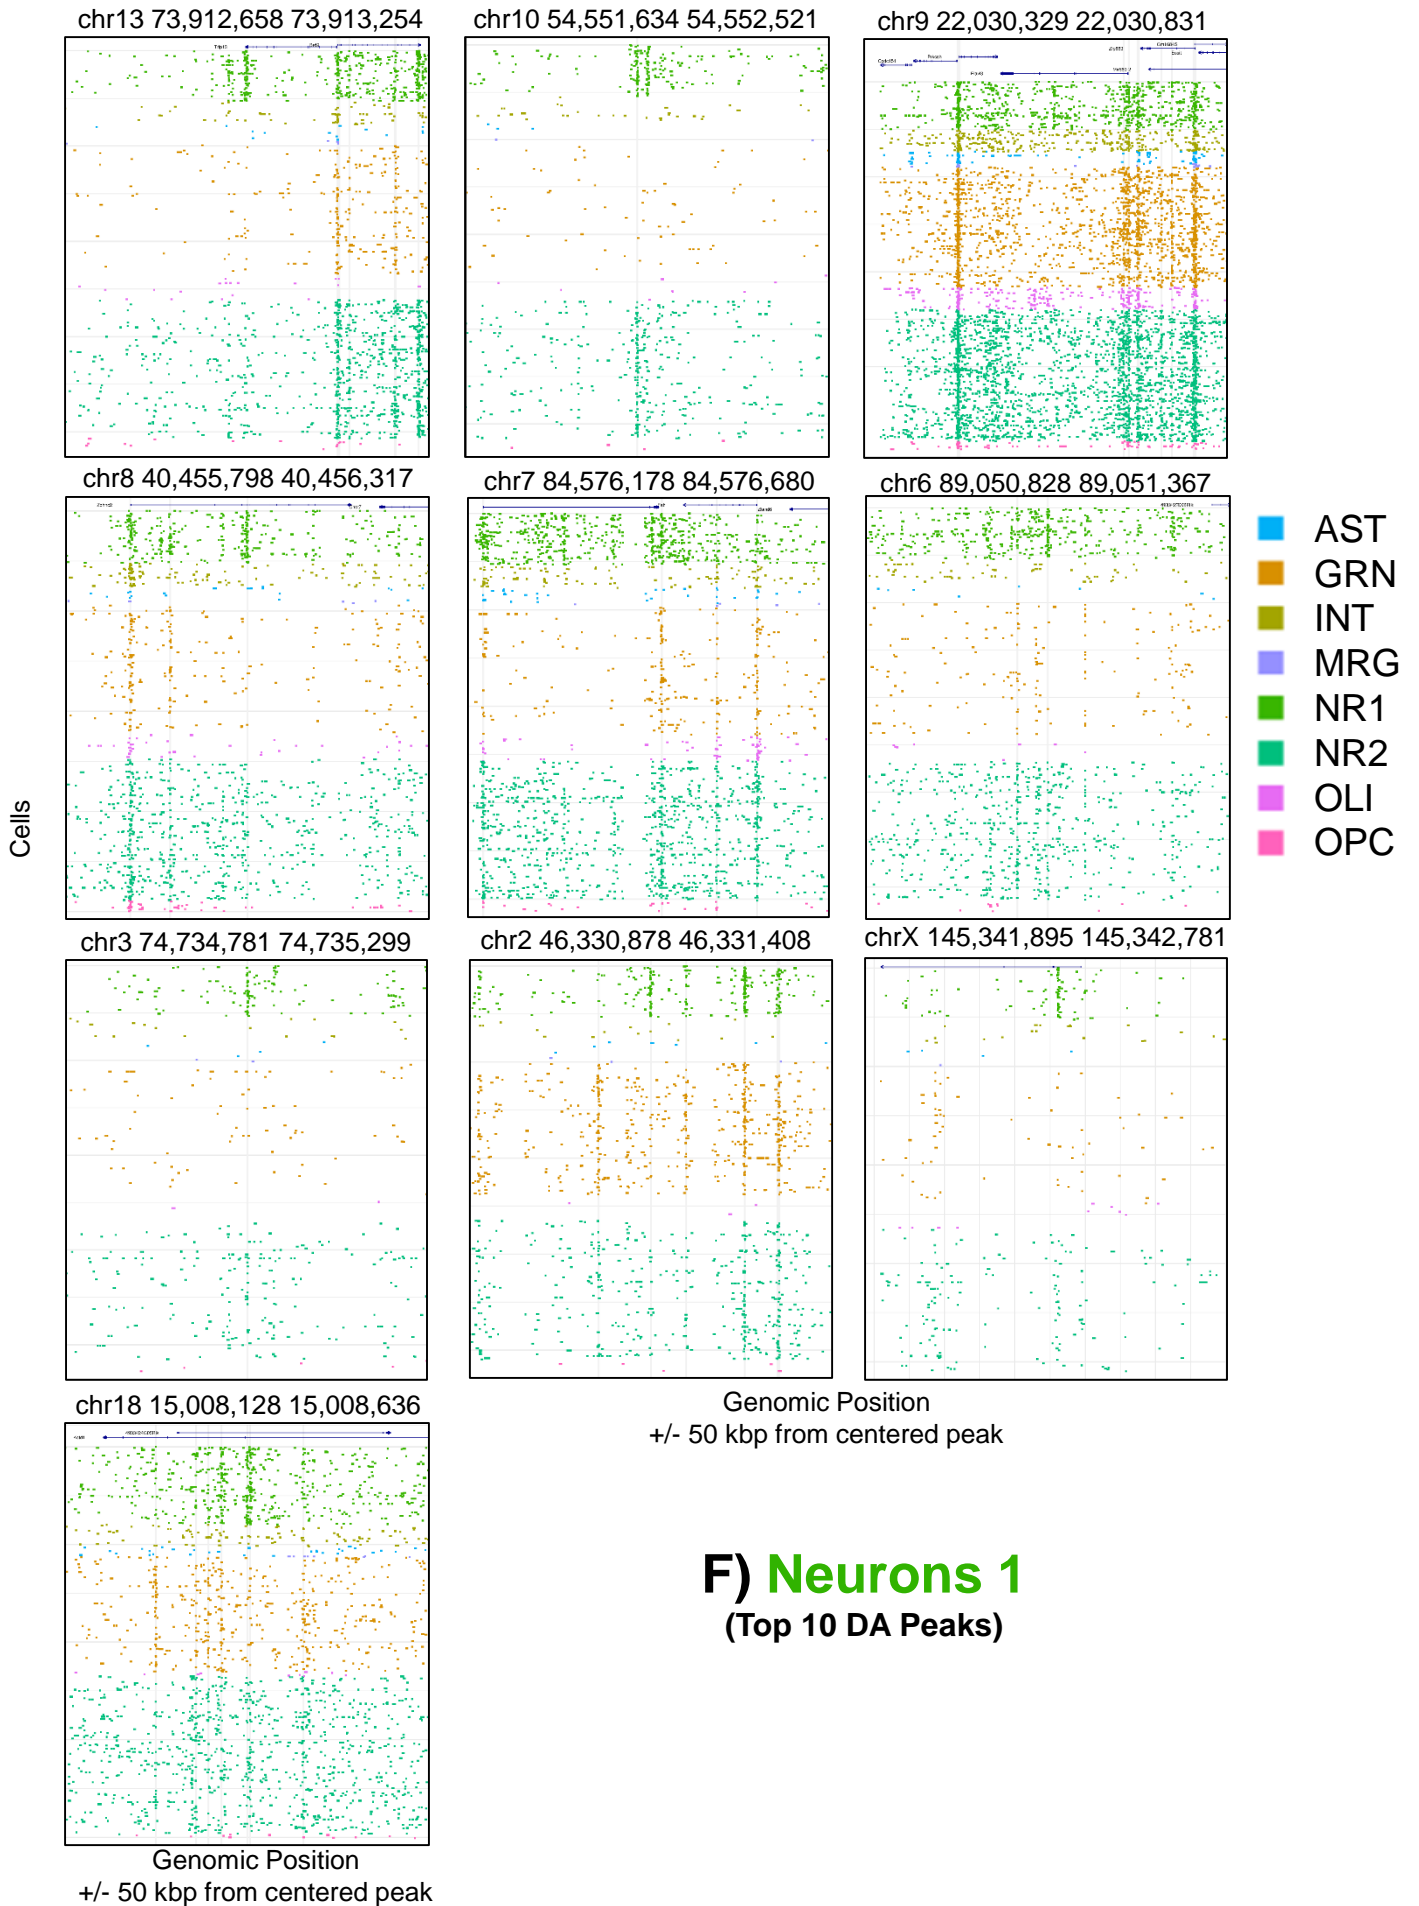



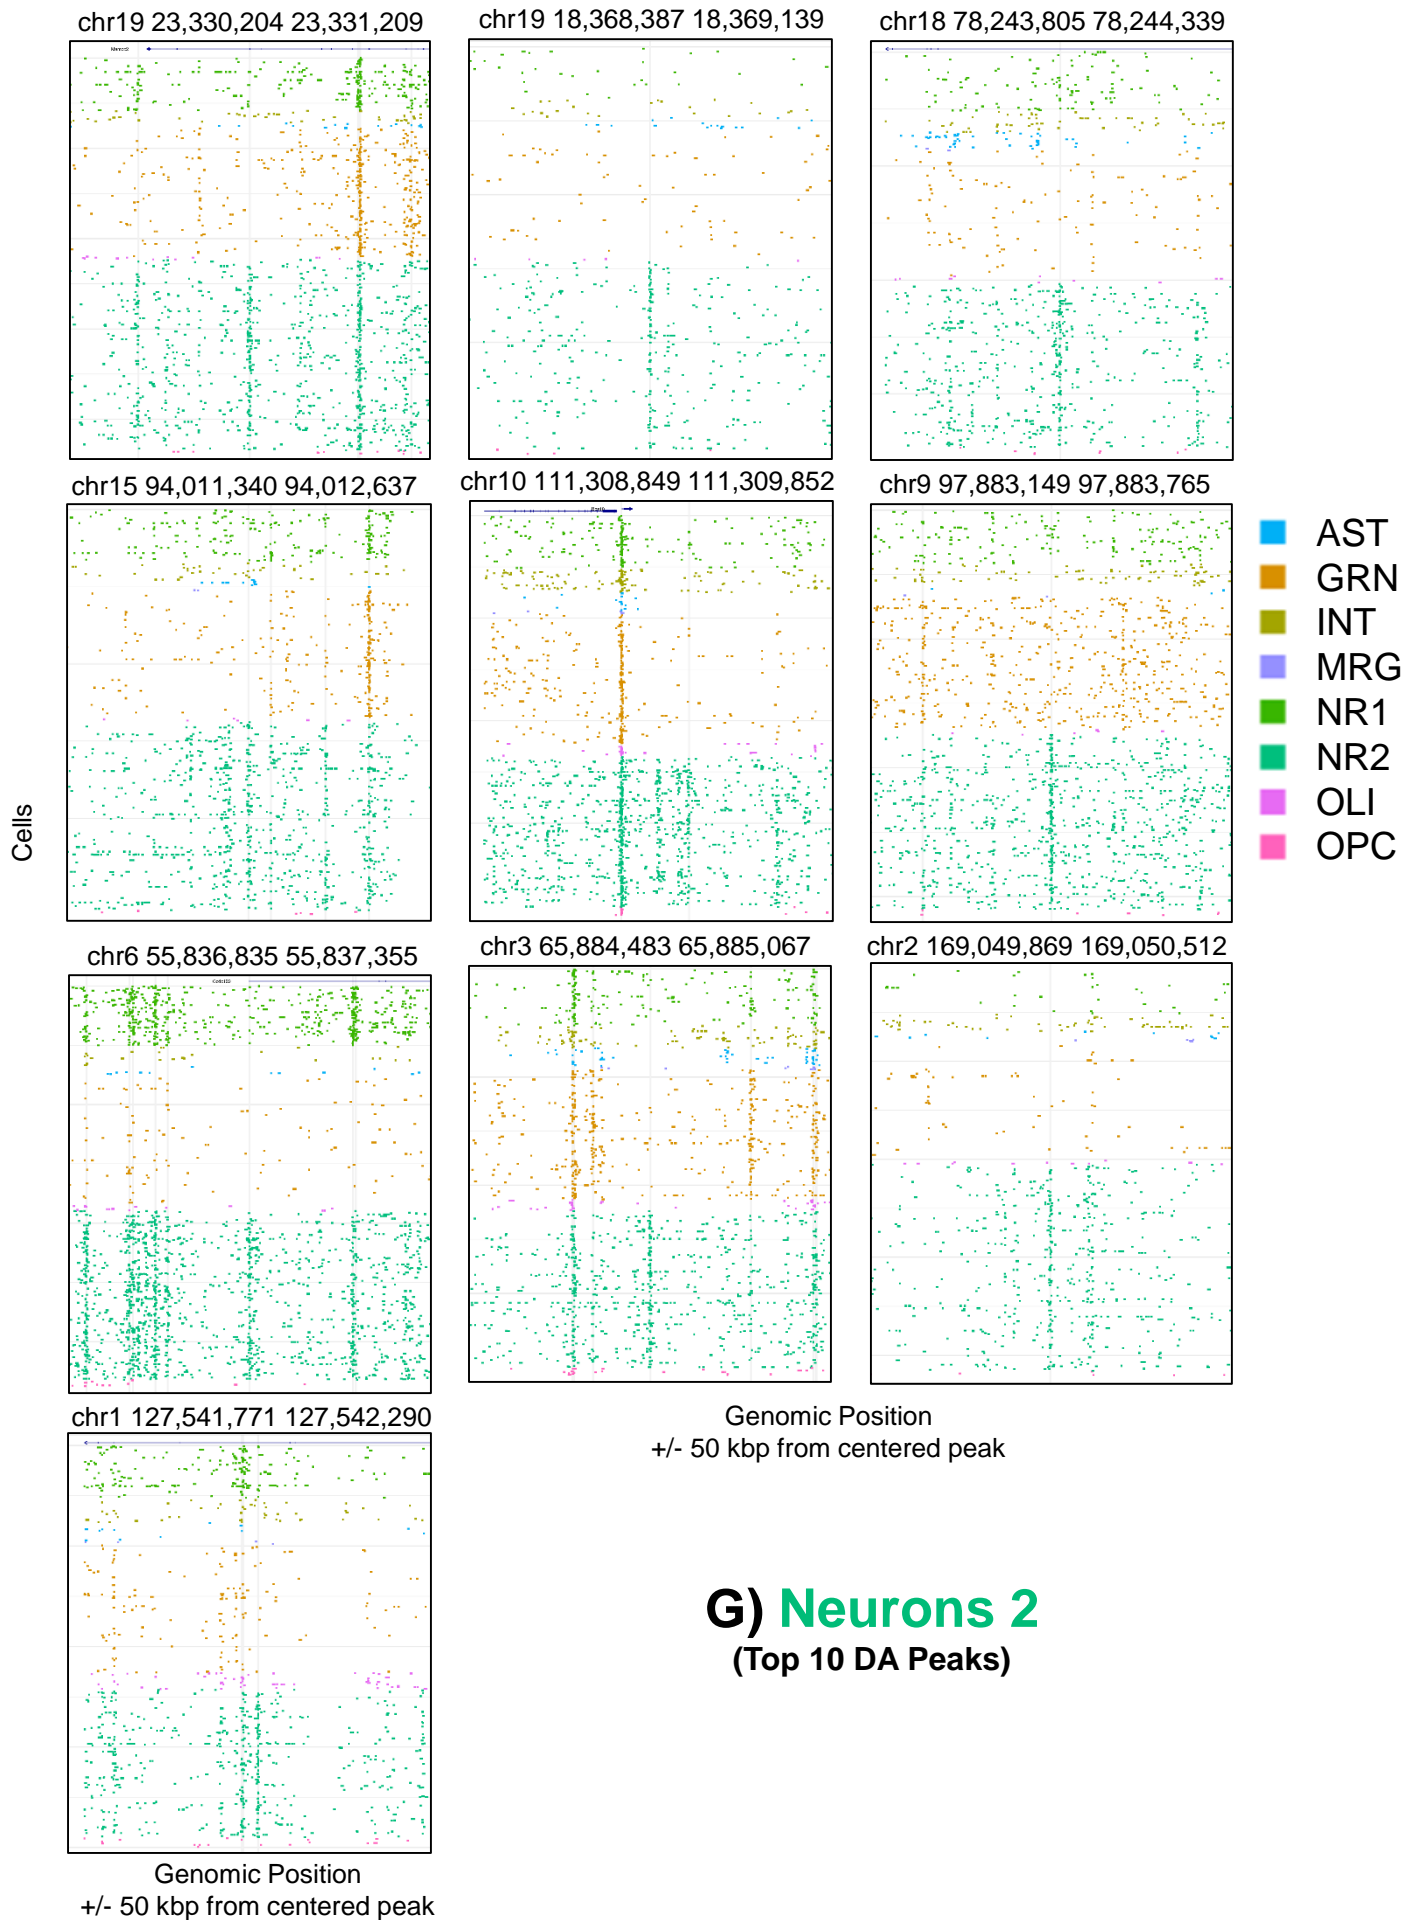

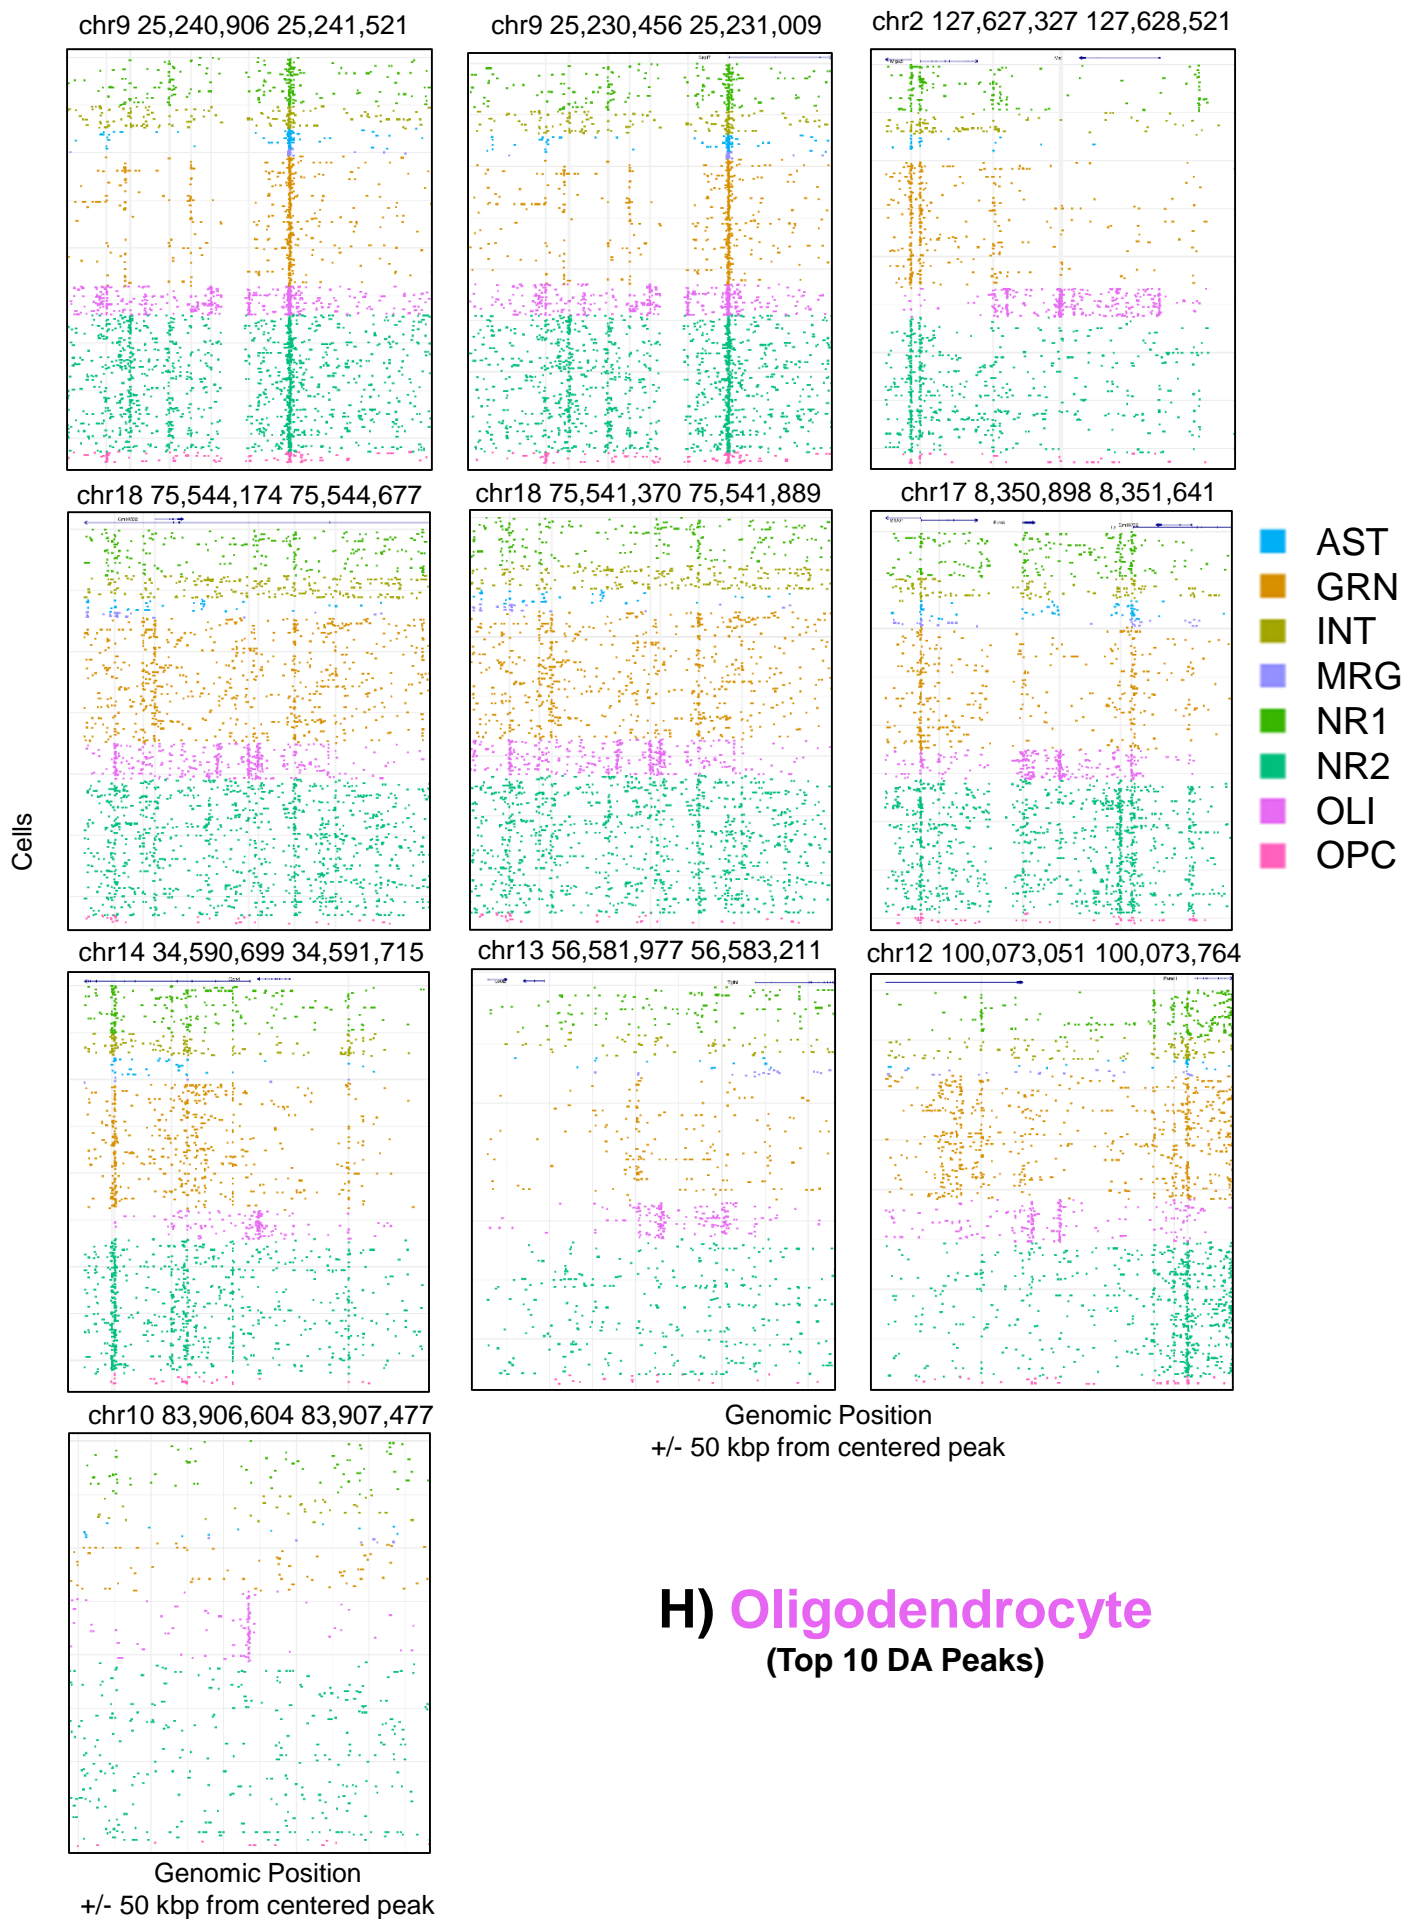

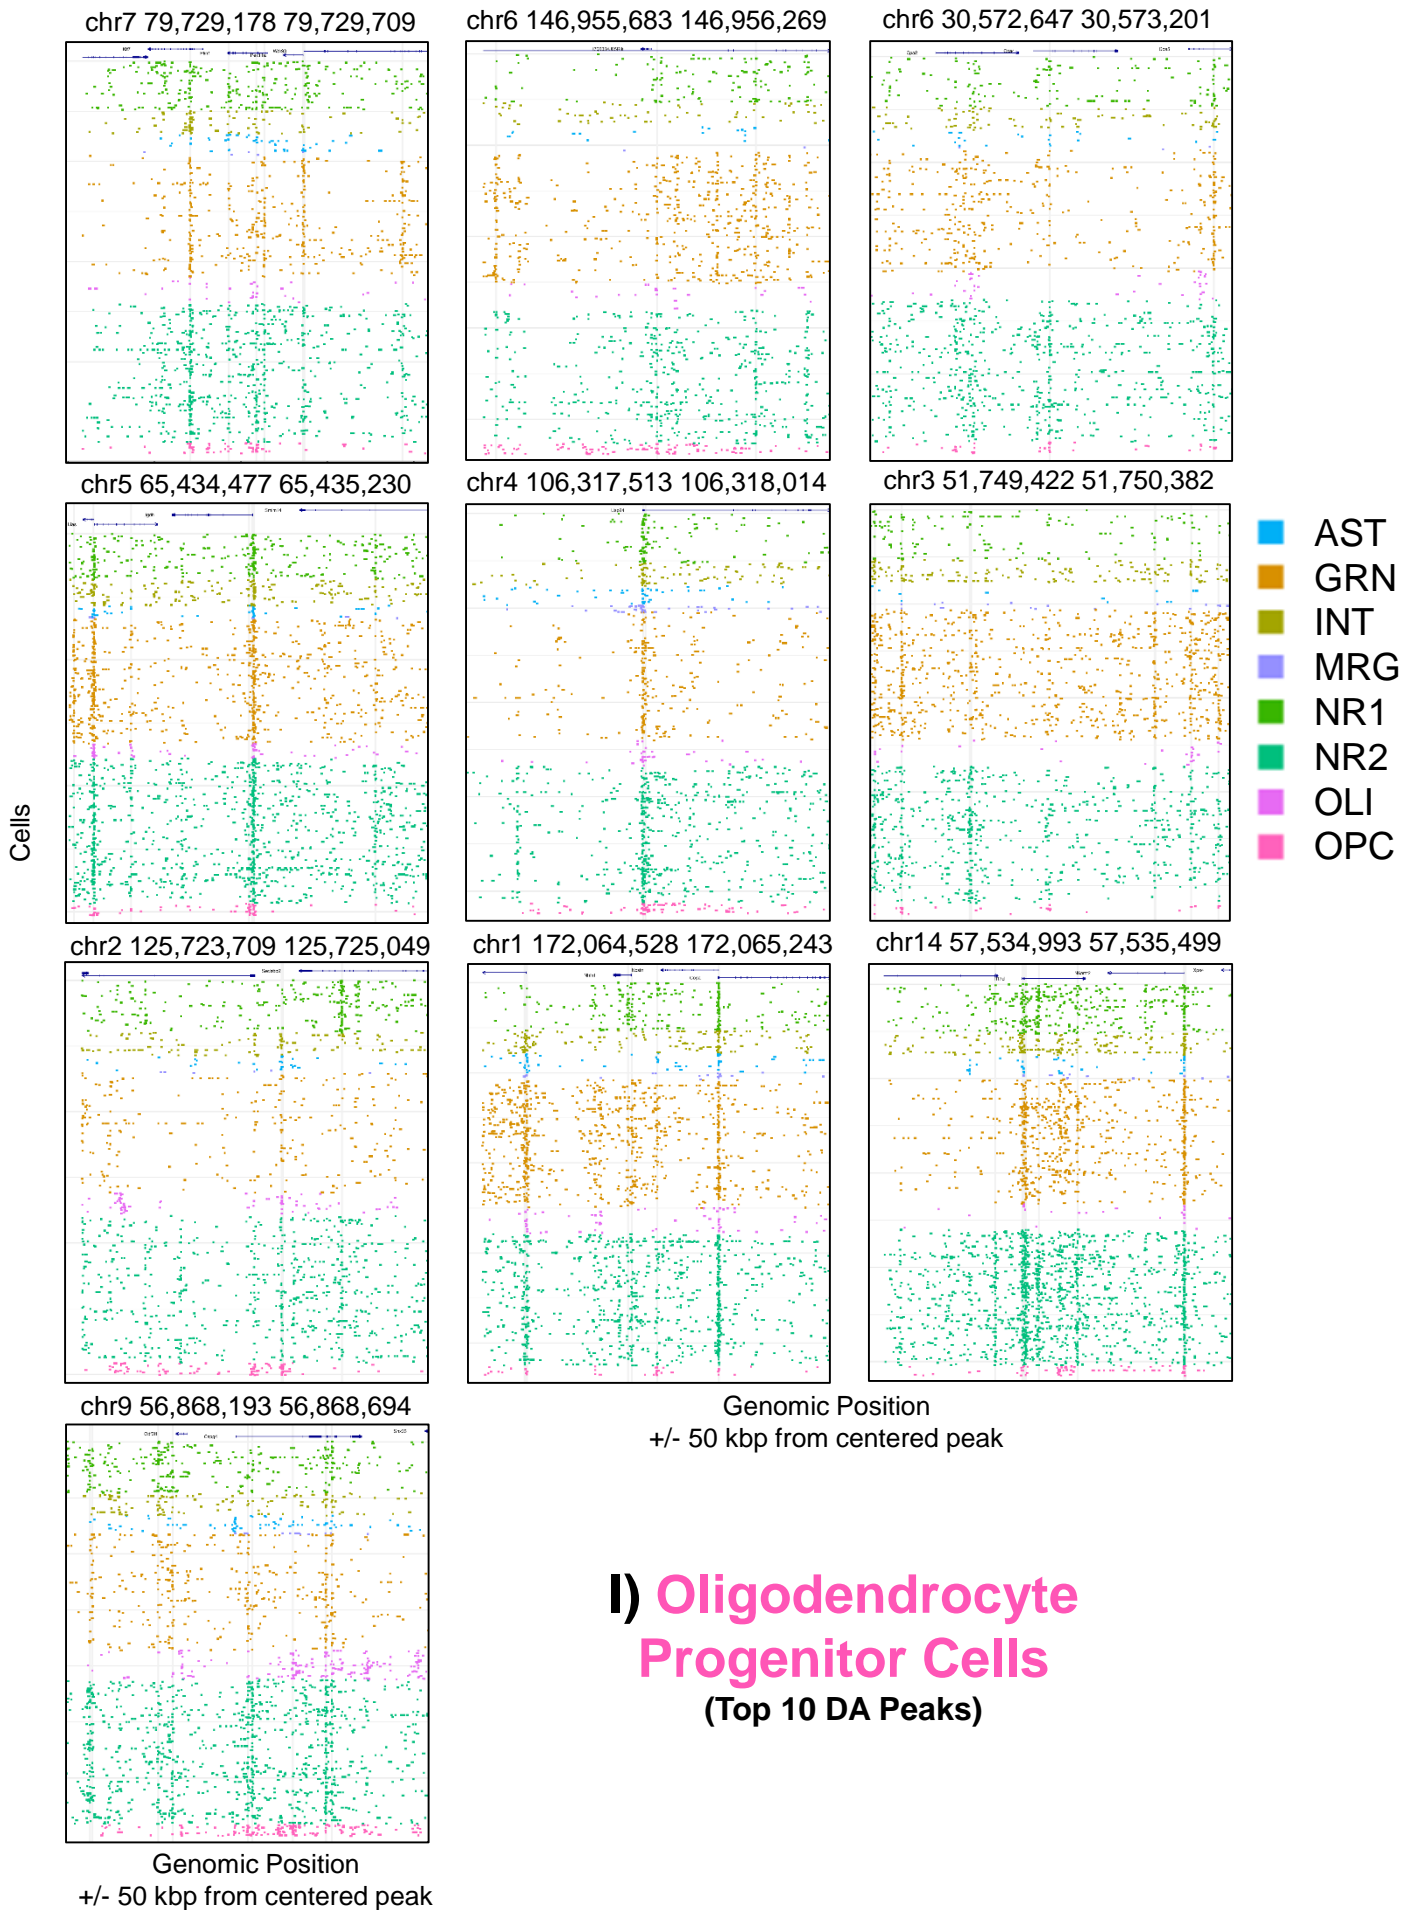

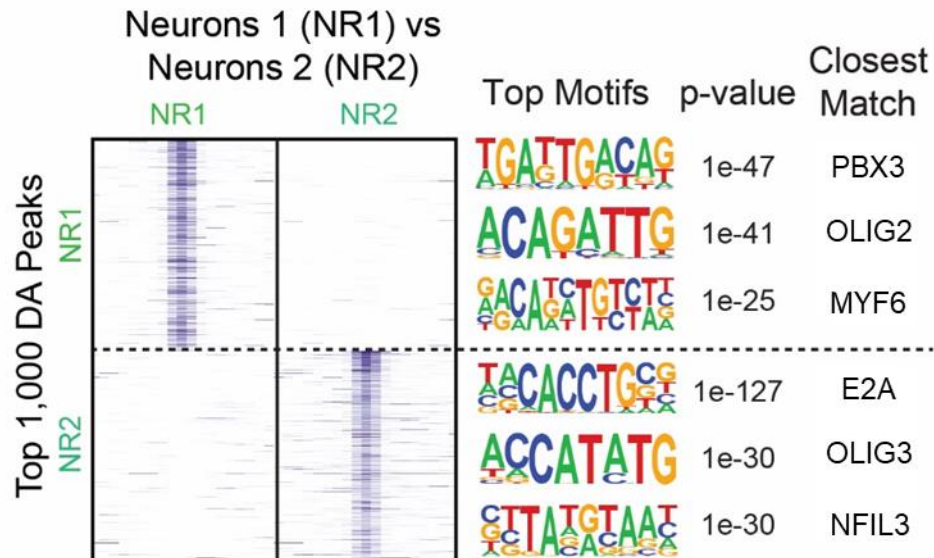

**Supplemental Figure 9: Top DA peaks between NR1 and NR2 excitatory neuron cell types**

ATAC-seq signal for the top 1,000 DA peaks is plotted for each cell type along with the top three motifs associated with each peak set and their corresponding p-value and closest matching motif.

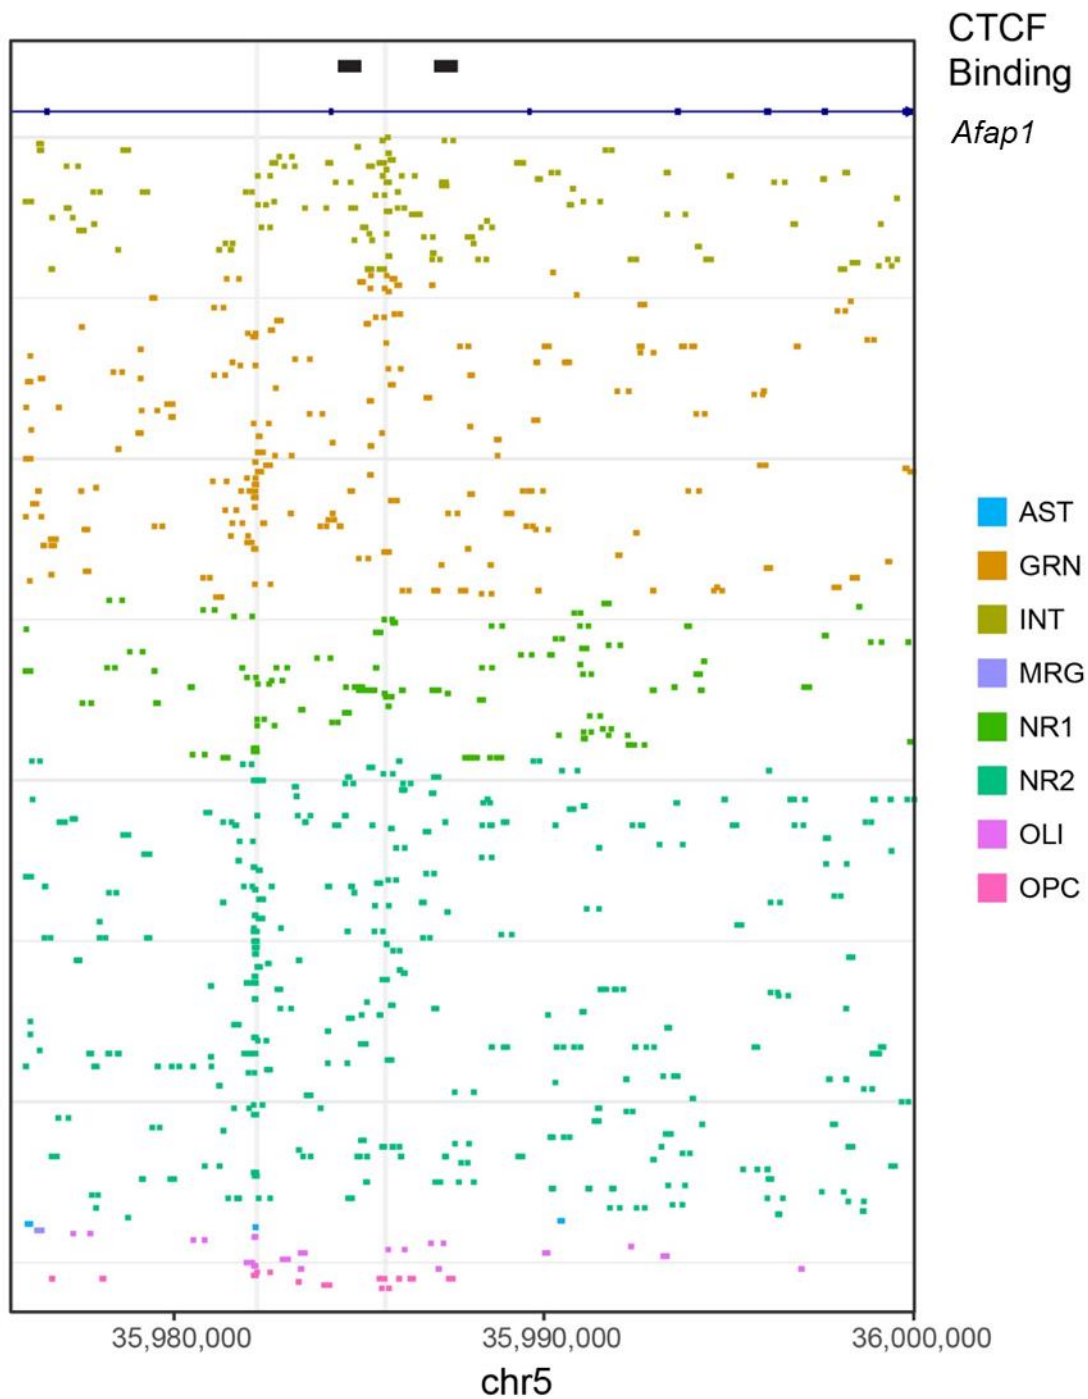

**Supplemental Figure 10: *Afap1* locus**

Read plot generated by scitools showing a peak highly enriched in interneurons that is flanked by CTCF ChIP-seq peaks.

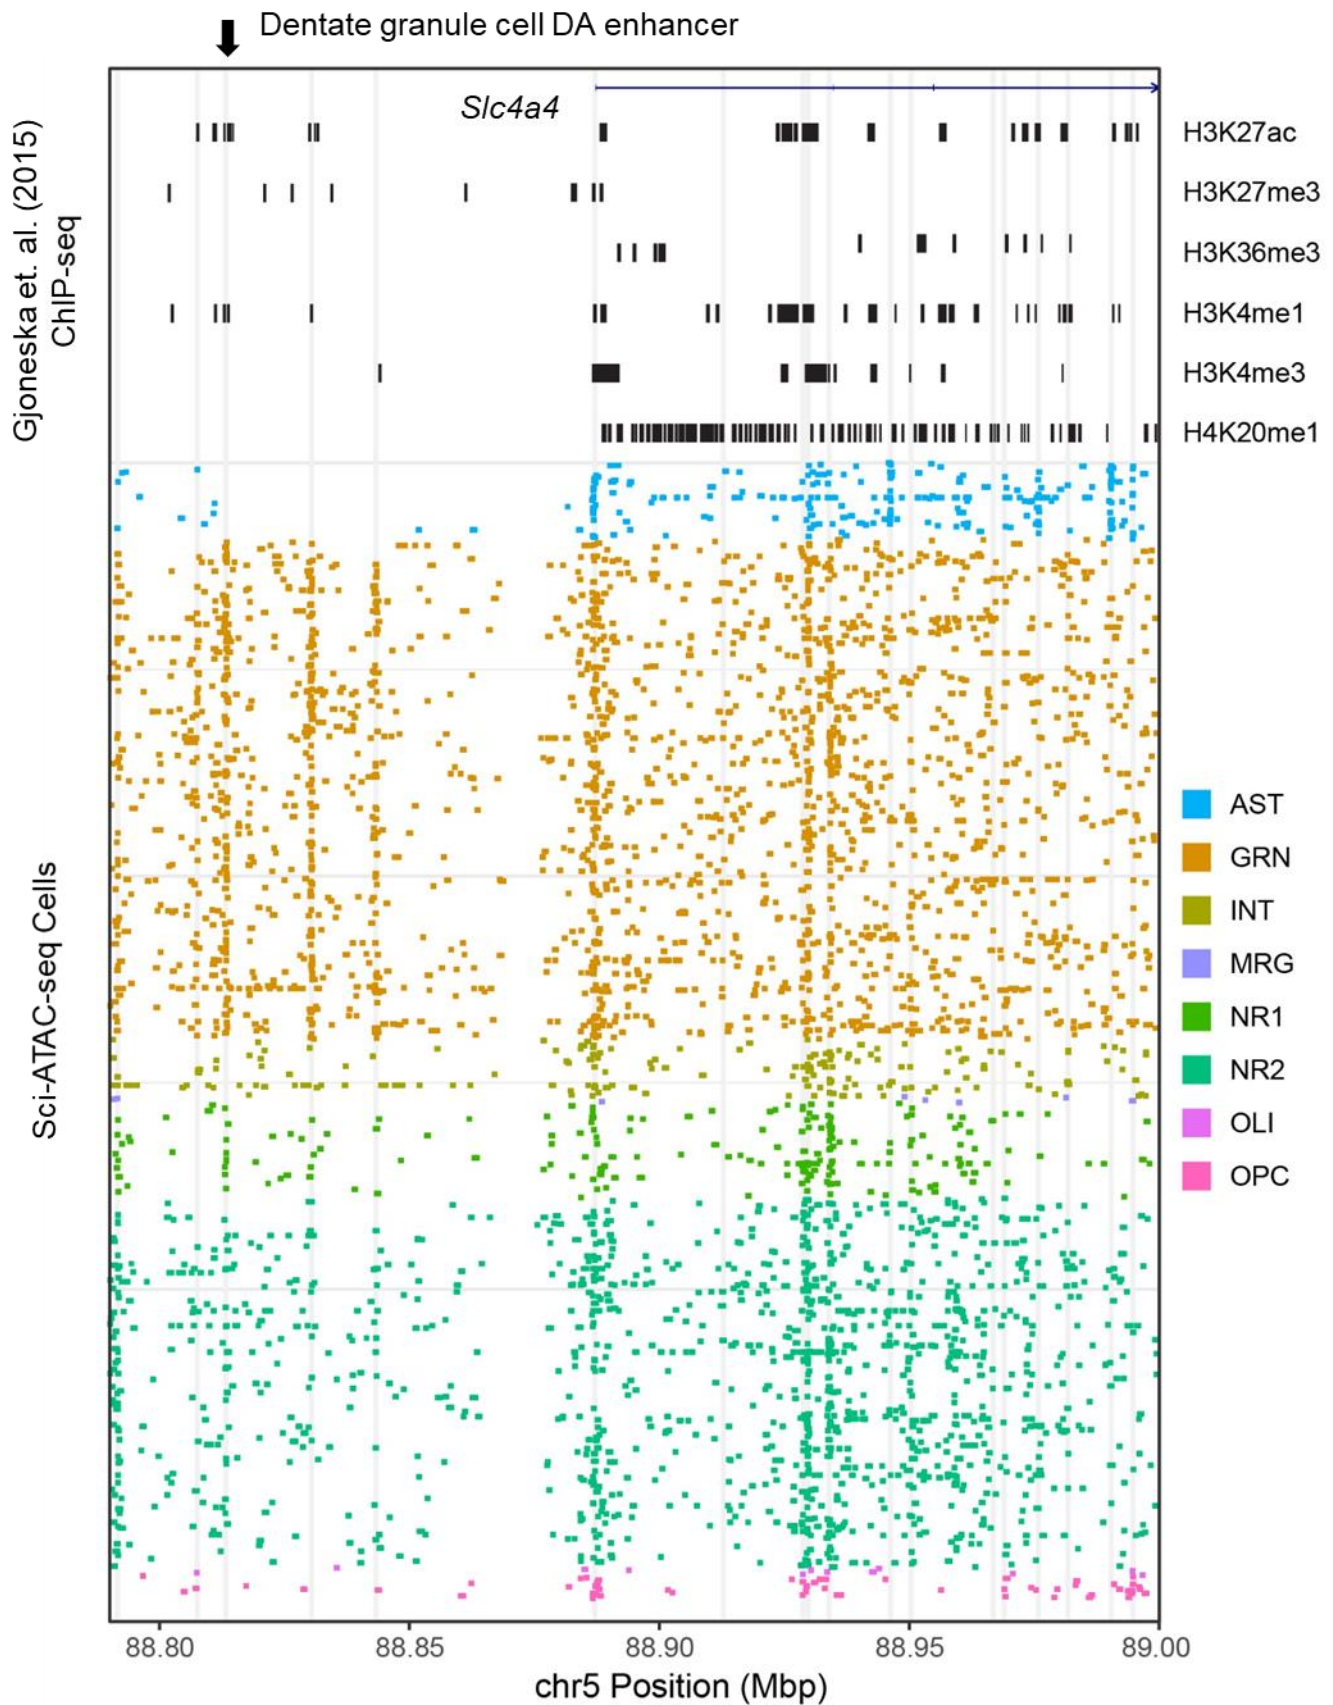

### Supplemental Figure 11: *Slc4a4* locus

Read plot generated by scitools showing the putative cell-type-specific enhancer of *Slc4a4* that is differentially accessible in the dentate granule cell population. ChIP-seq peaks from Gjoneska et. al. (2015) are shown below the gene track in black.

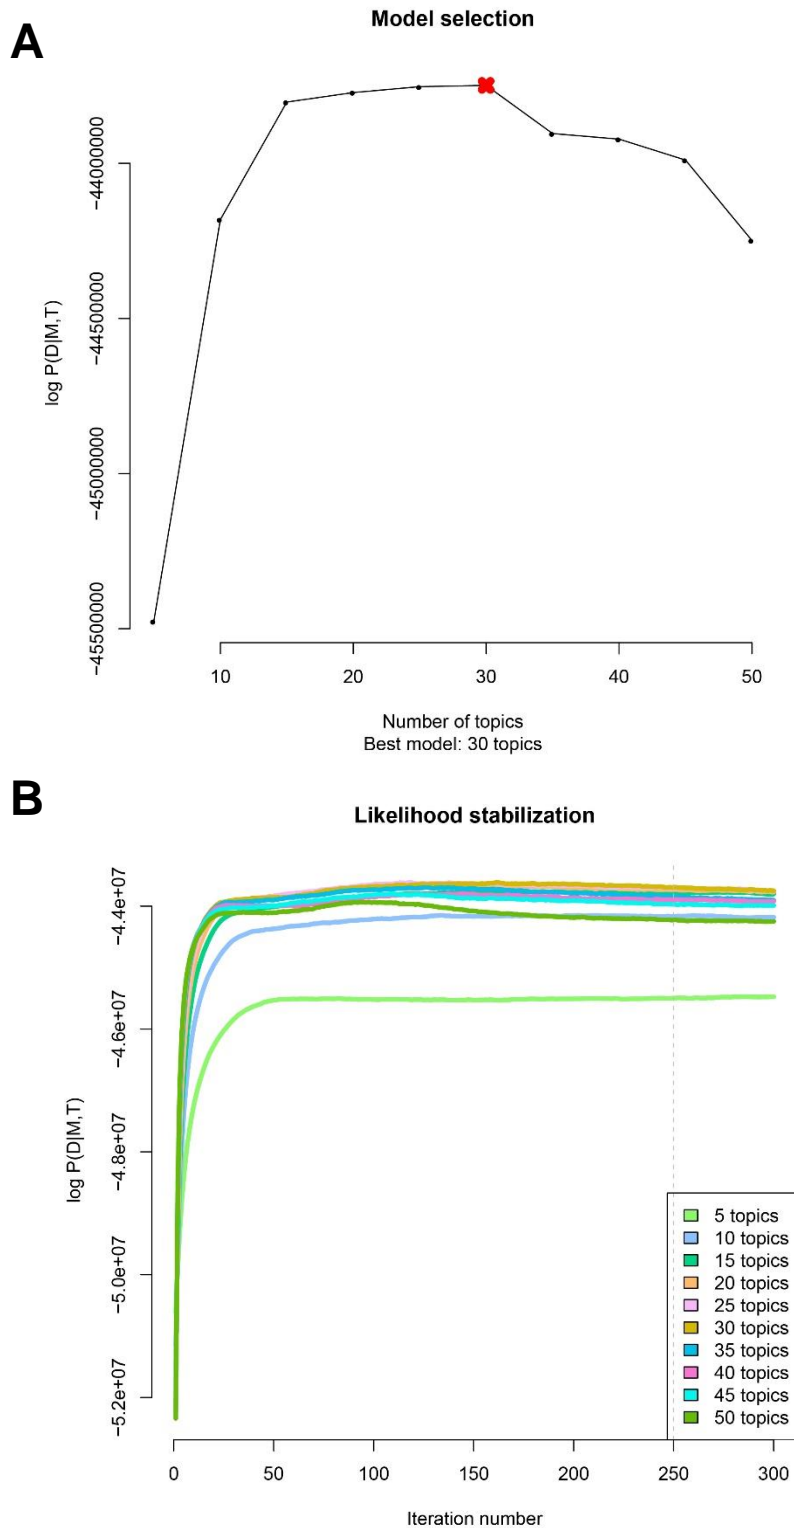

**Supplemental Figure 12: CisTopic Topic Selection for NR 1 & 2 clusters**

(A) Multiple topics are run to optimize topic separation. 30 was determined to be the optimum number for subsequent analysis. (B) Stabilization of the model over iterations. All models stabilized by approximately 50 iterations, though 300 were run in all cases.

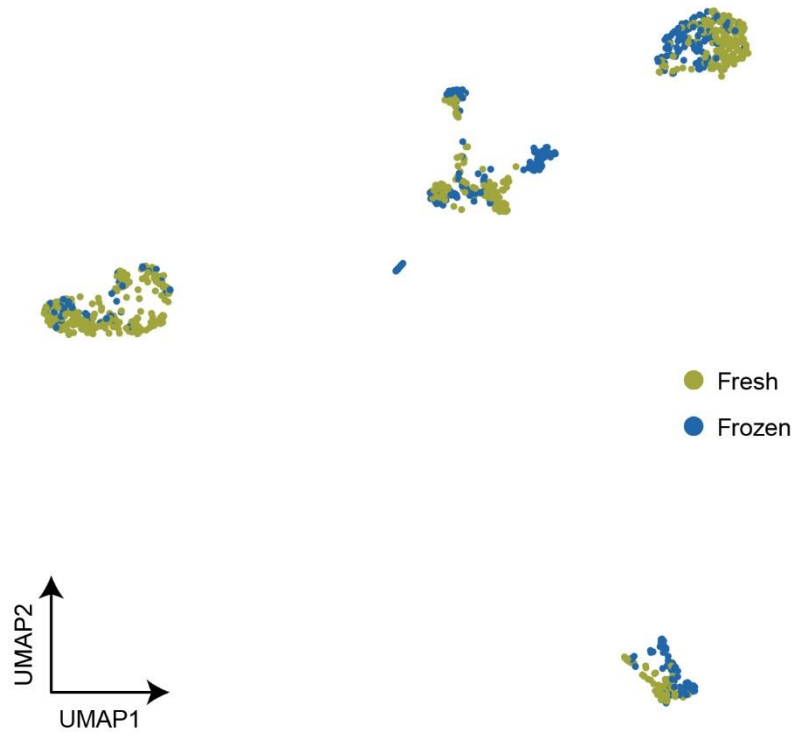

**Supplemental Figure 13: Fresh vs. Frozen comparison for pyramidal neuron subclustering**

UMAP coordinates as in Figure 3, with cell colors corresponding to fresh vs. frozen preparations.



CA1 Genes

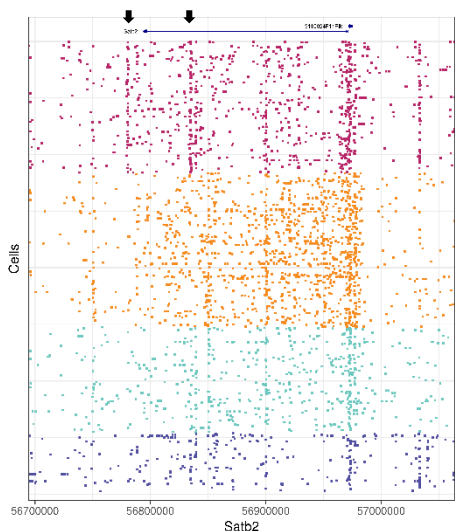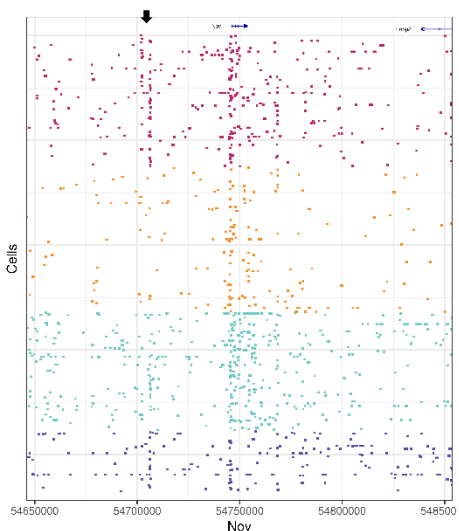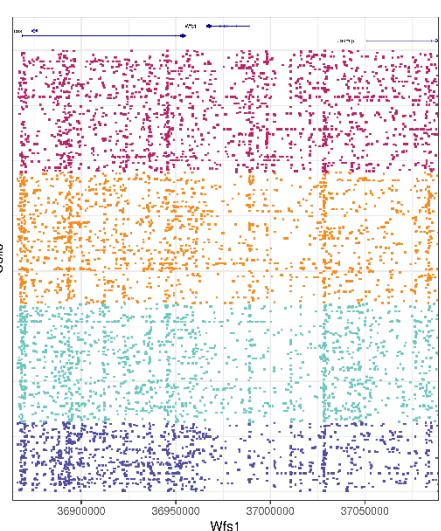

CA2 Genes

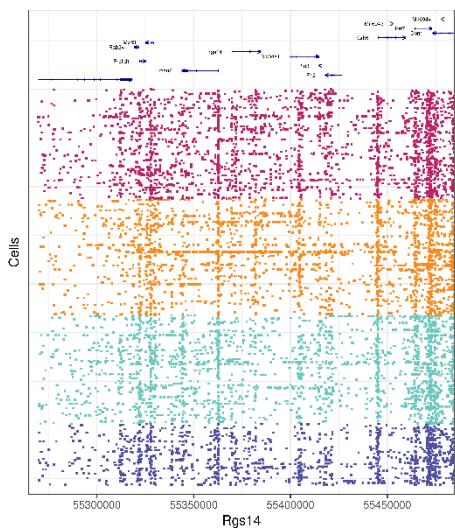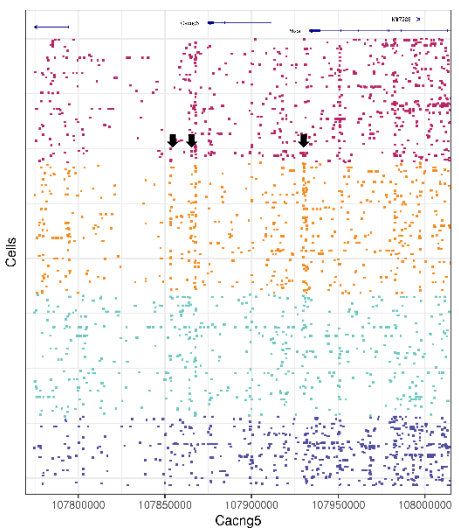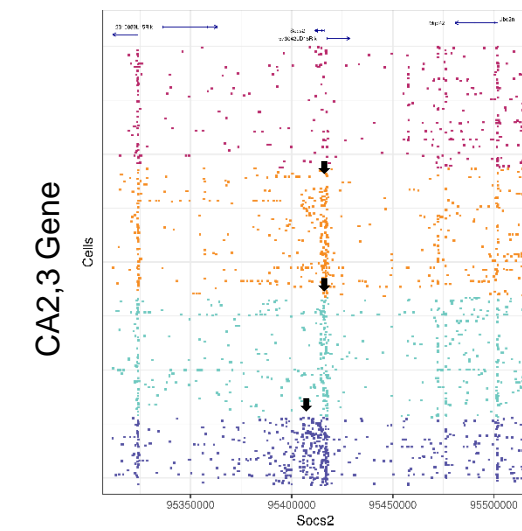

CA2,3 Gene

CA3 Genes

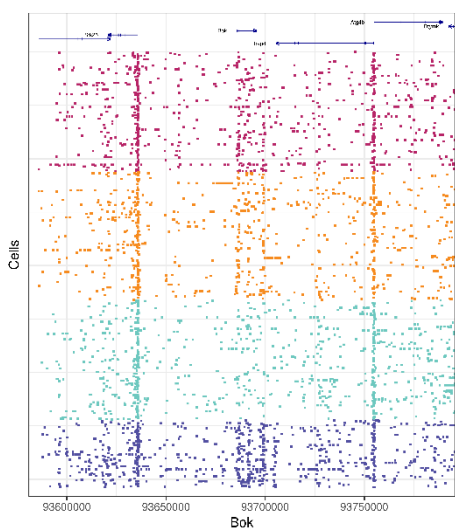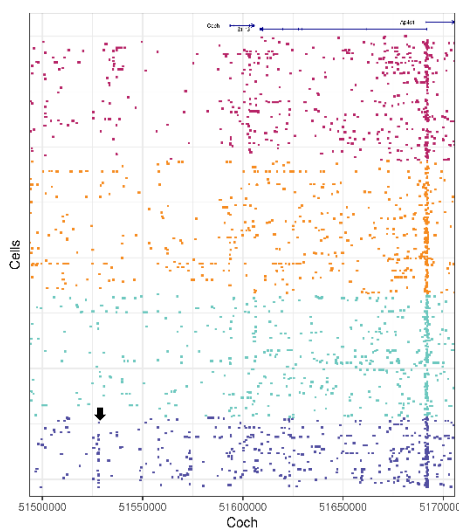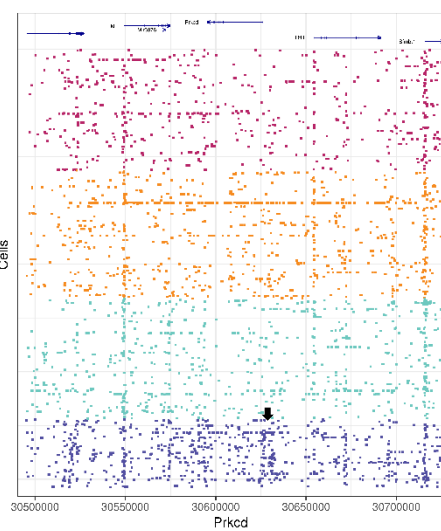

**Supplemental Figure 14: Read plots for CA1, CA2, and CA3 genes**

Read plots for marker genes associated with CA1, CA2, and CA3. Arrows indicate enrichment of signal present in the corresponding cell type cluster. Arrows denote peaks enriched in the corresponding cell population.

- CA1 (NR1)
- CA2
- Other/MC
- CA3

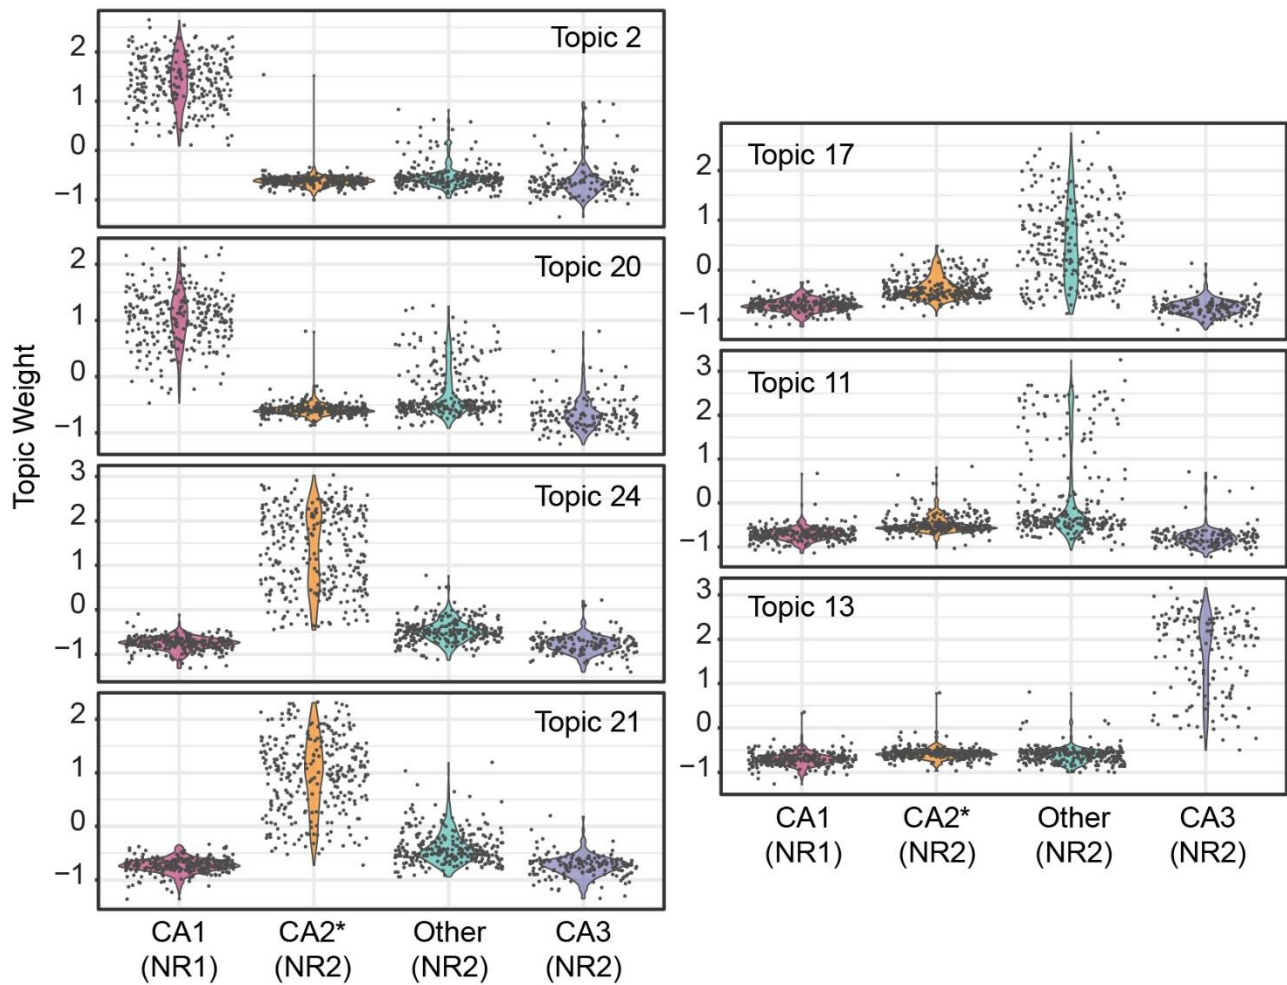

**Supplemental Figure 15: Topic weights of cells in each pyramidal neuron cluster**

Select cisTopic topics that exhibited cluster specificity are shown. The y-axis represents the weight of each topic for each cell by cluster identity (x-axis). Asterisk denotes putative assignment.

**A**

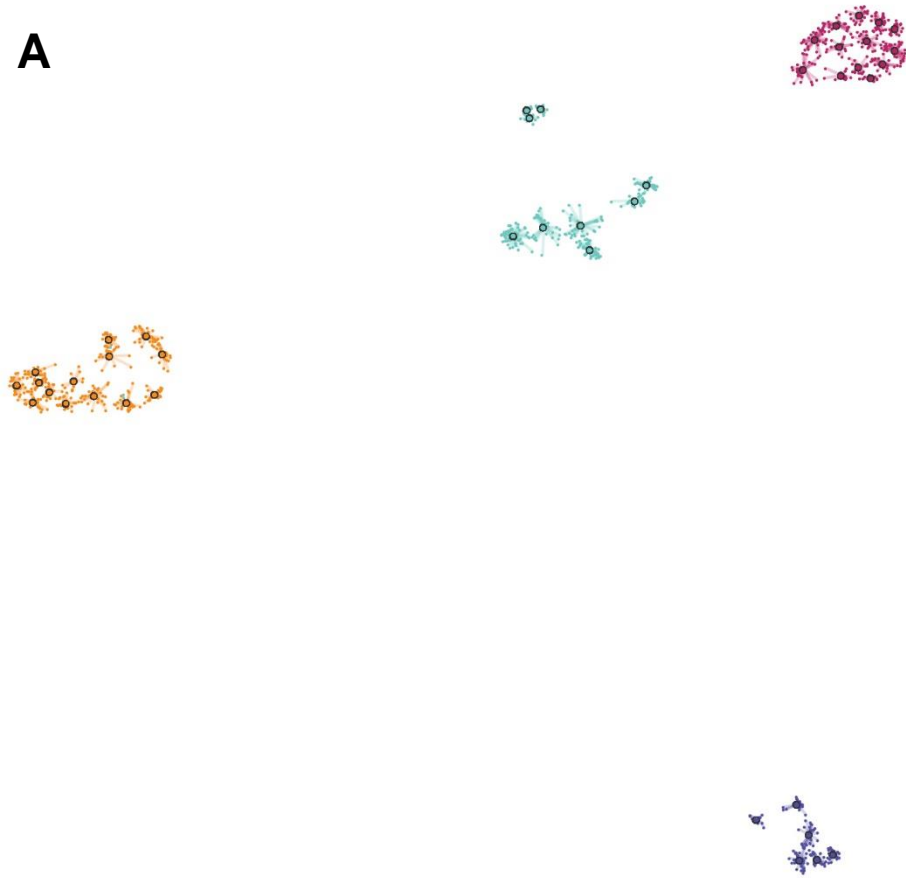

**Supplemental Figure 16A: scitools aggregate-cells**

**B**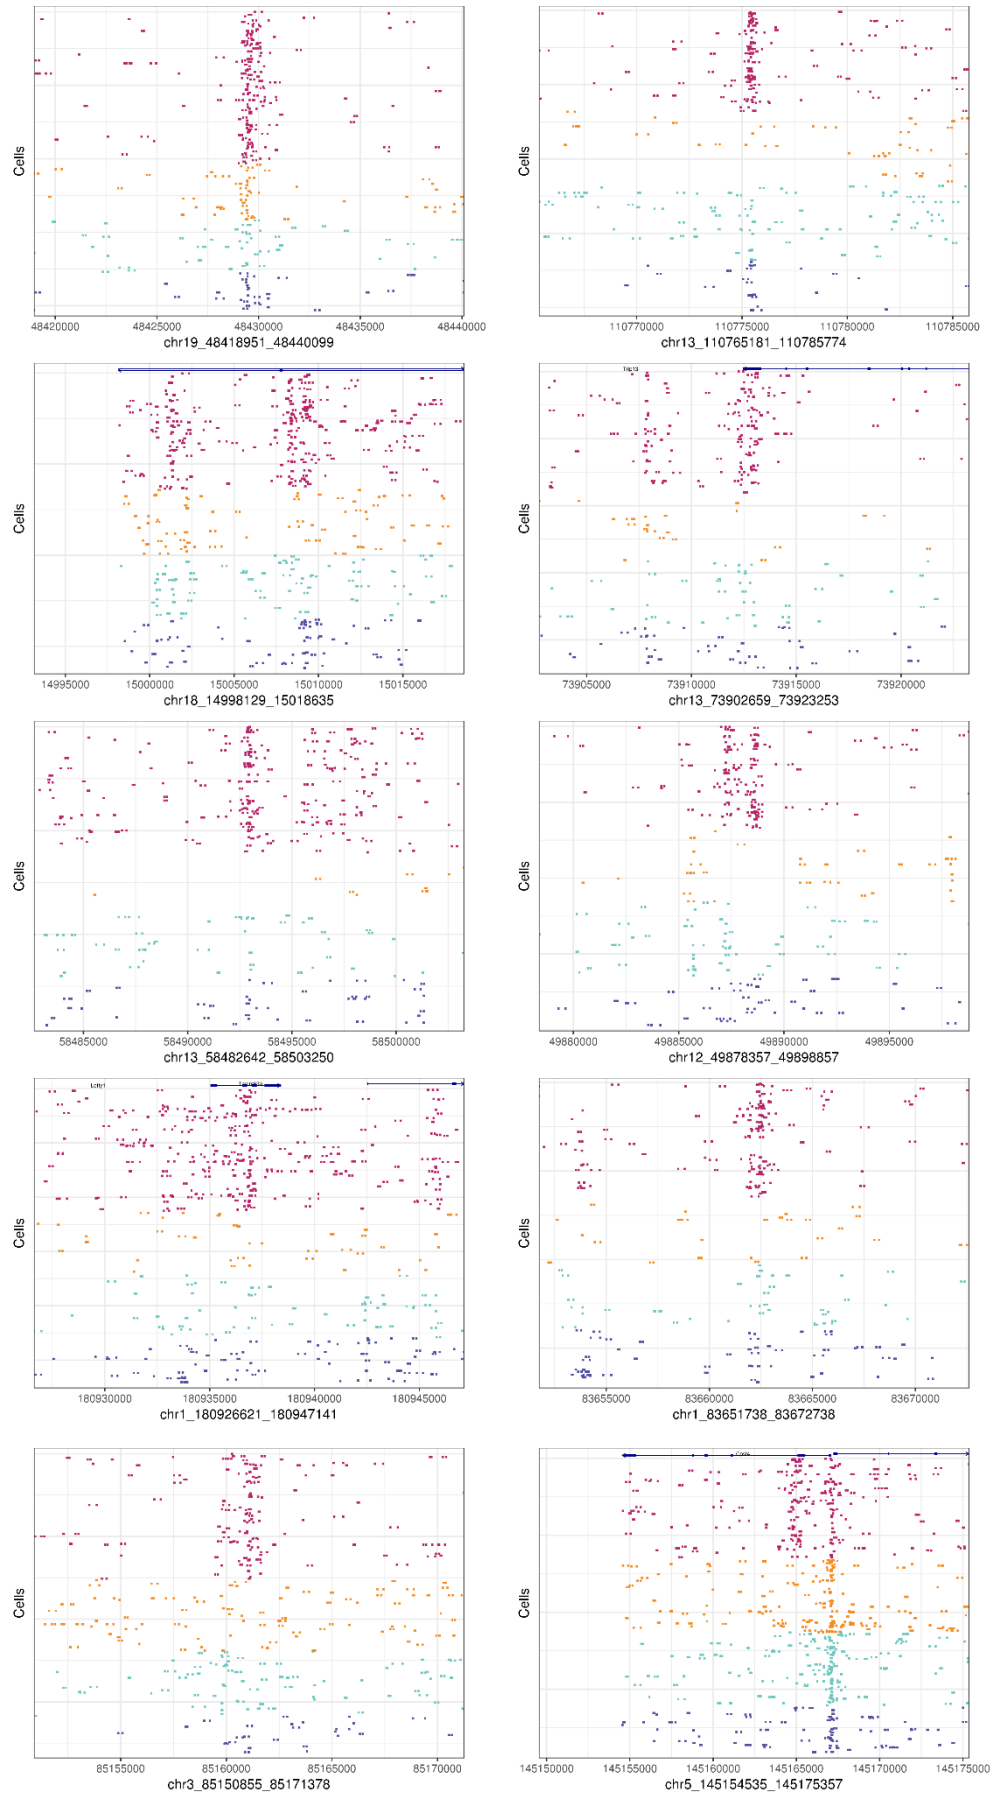**Supplemental Figure 16B: Top 10 DA loci for CA1 cluster**

**C**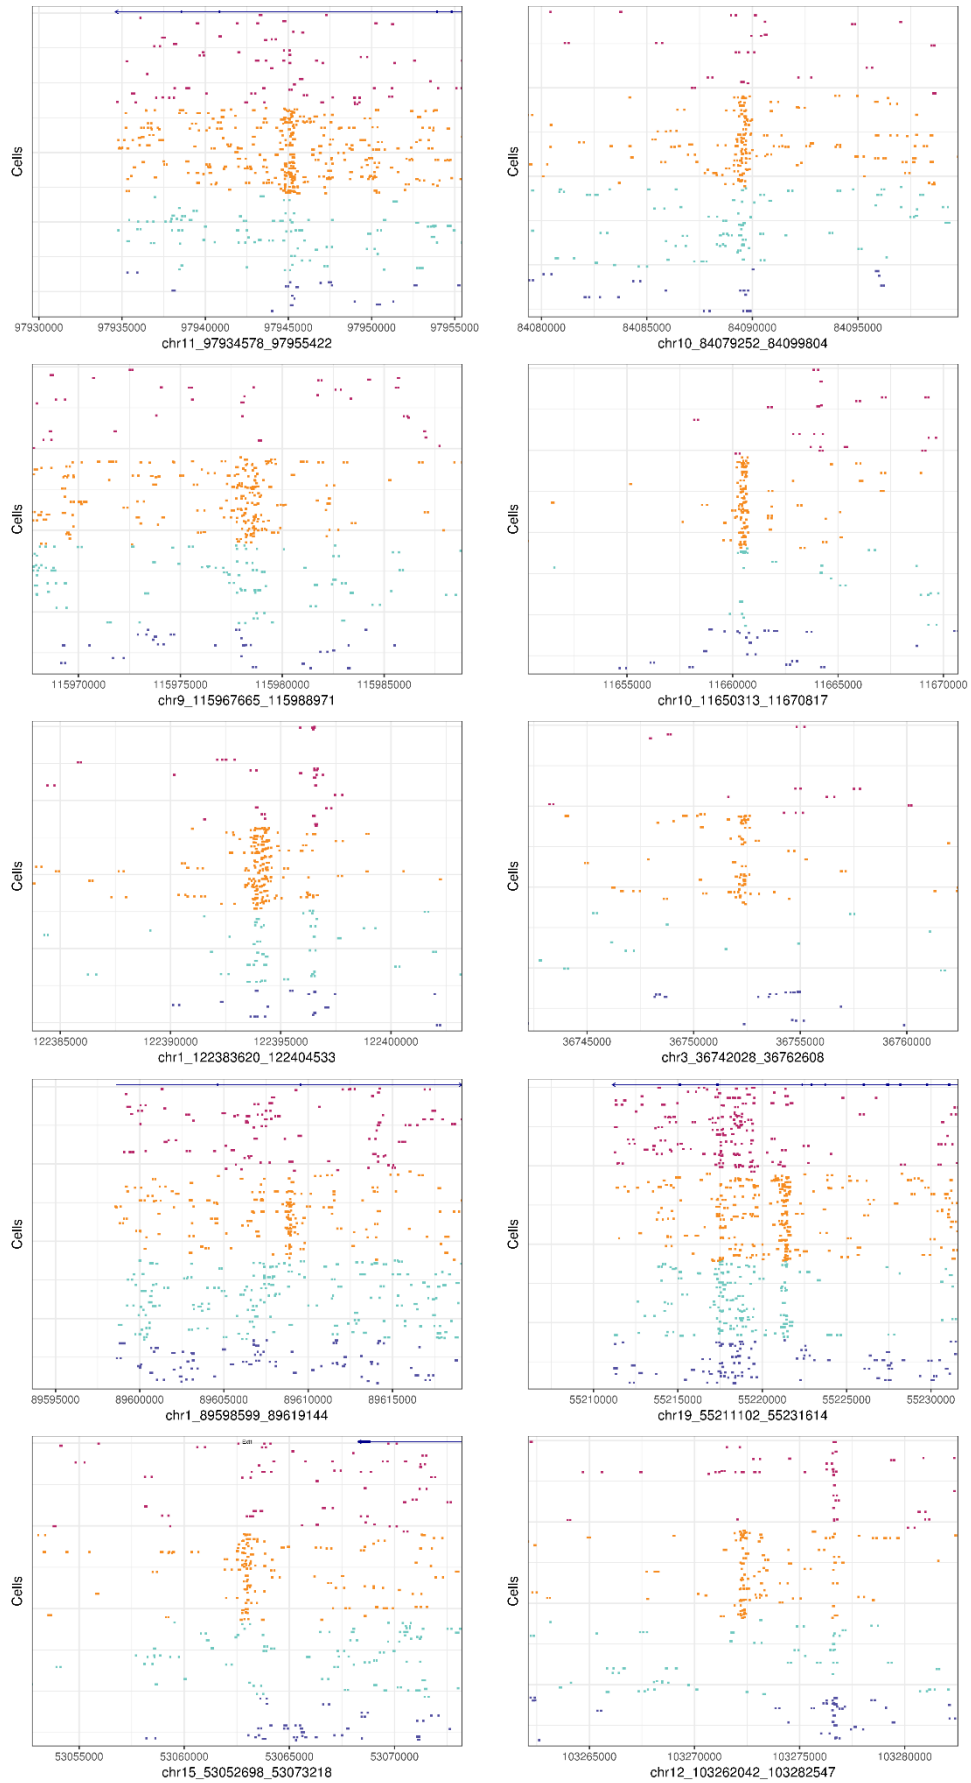**Supplemental Figure 16C: Top 10 DA loci for CA2 cluster**

**D**

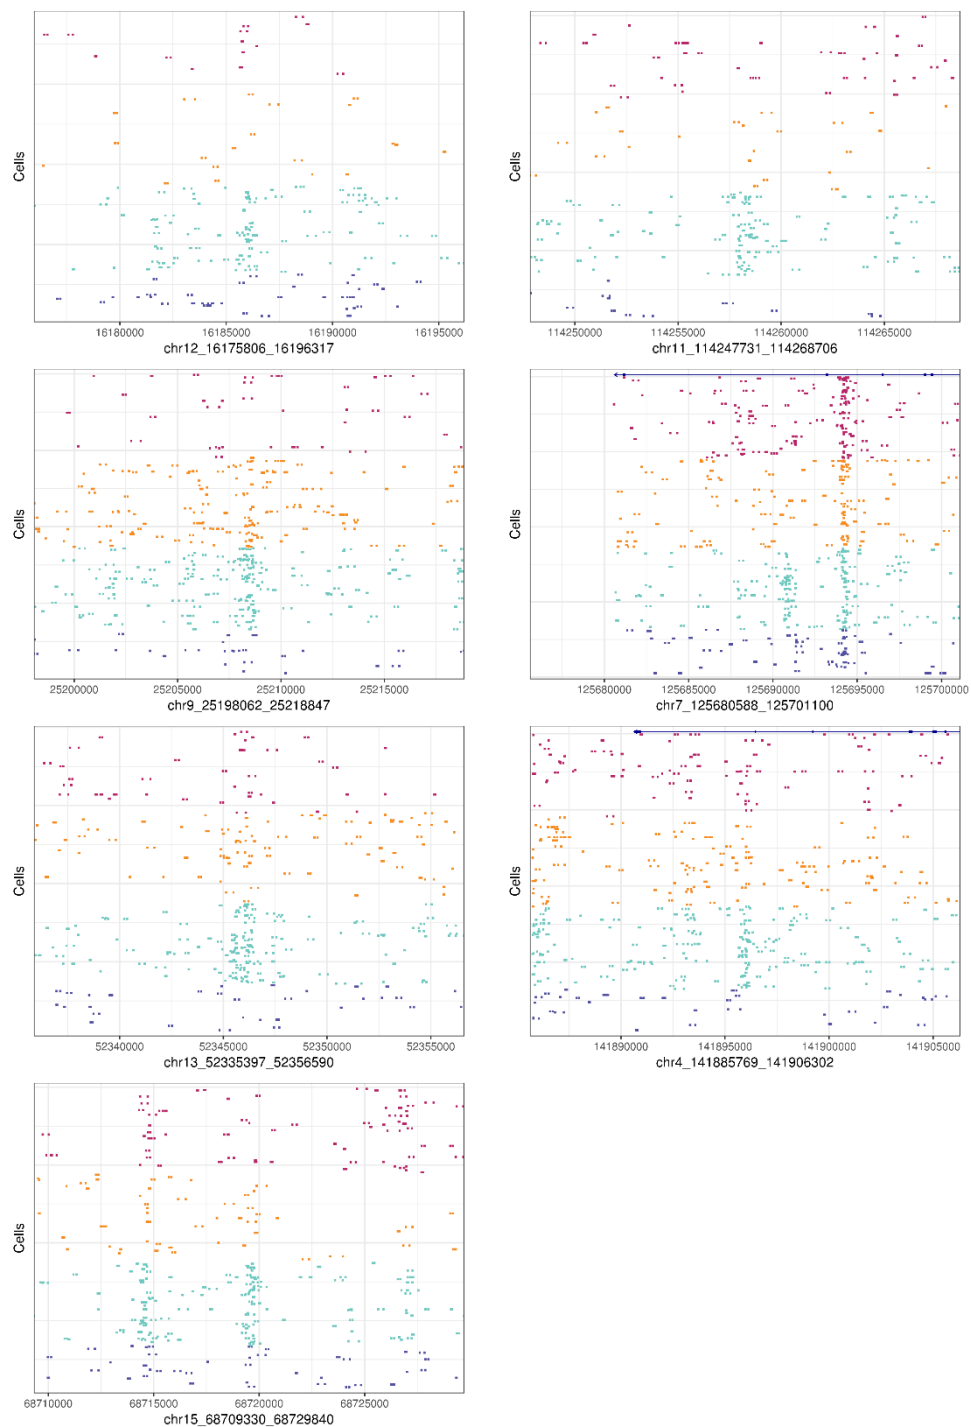

**Supplemental Figure 16D: All 7 significant DA loci for Other/MC cluster**

**E**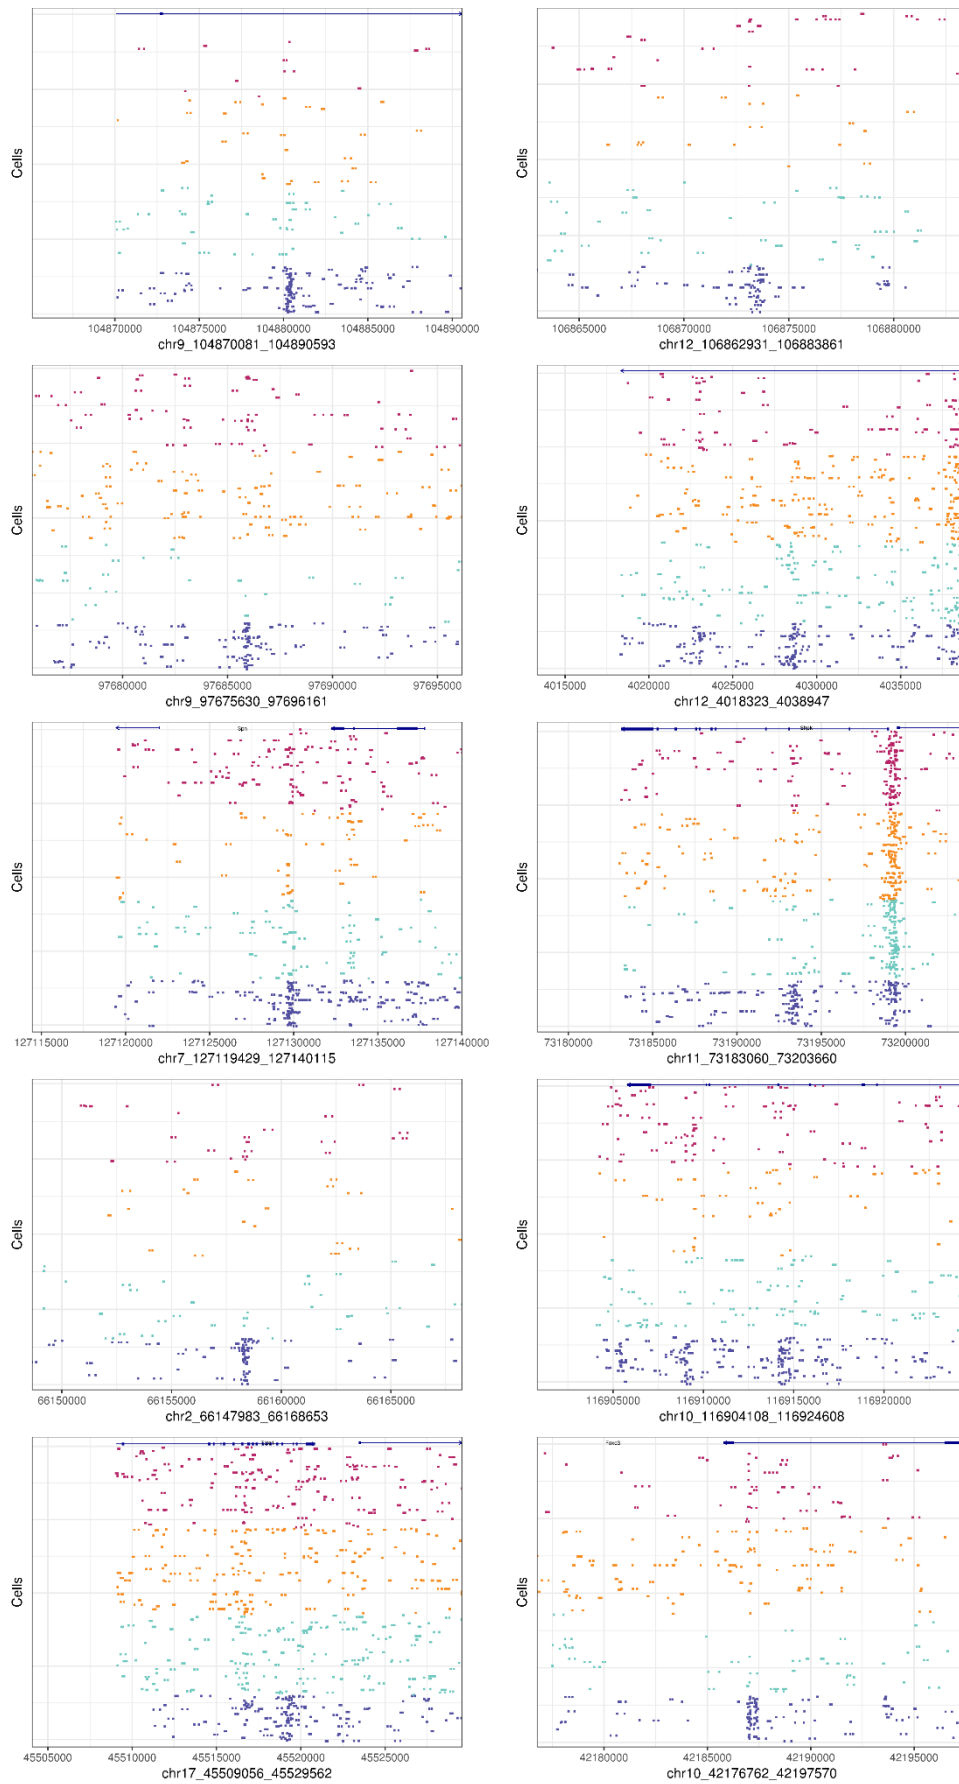**Supplemental Figure 16E: Top 10 DA loci for CA3 cluster**

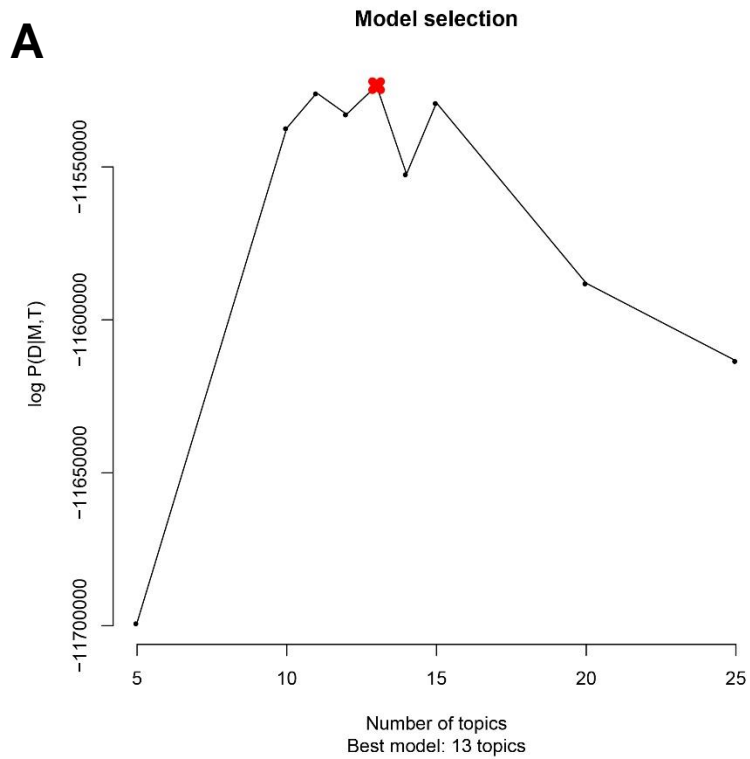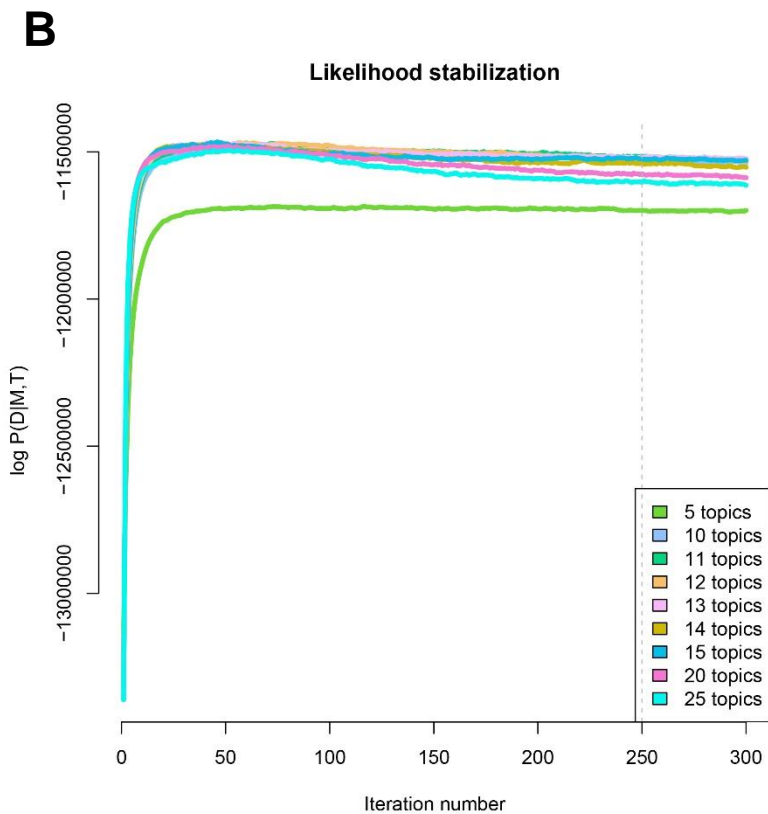

**Supplemental Figure 17: CisTopic Topic Selection for the Other subclustering**

(A) Multiple topics are run to optimize topic separation. 12 was determined to be the optimum number for subsequent analysis. (B) Stabilization of the model over iterations. All models stabilized by approximately 20 iterations, though 300 were run in all cases.



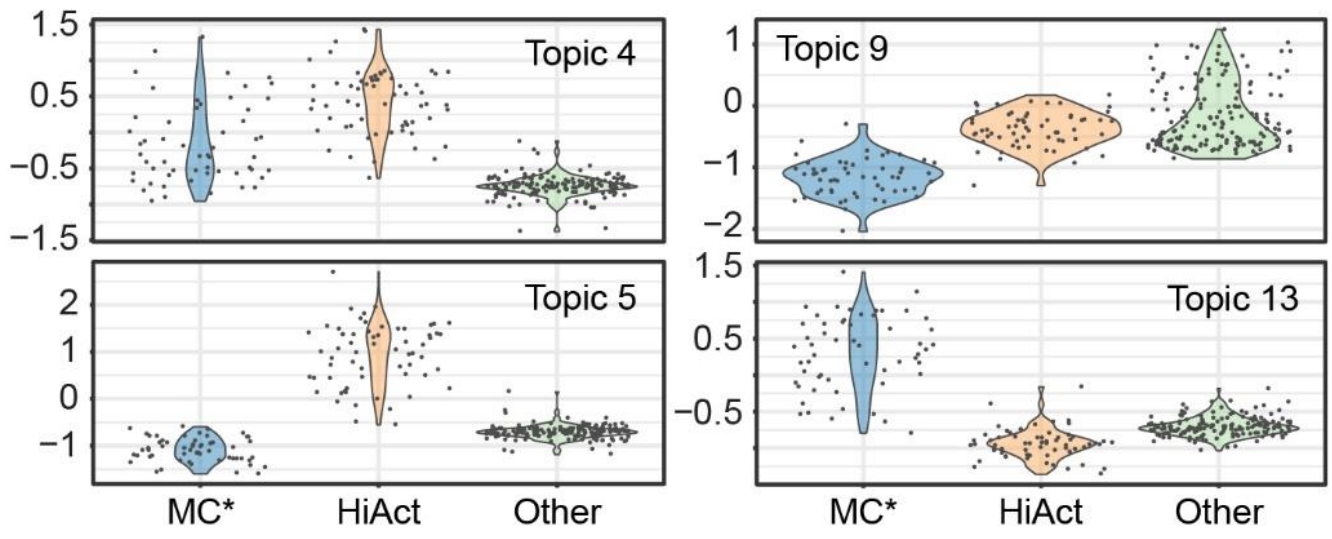

**Supplemental Figure 18: Topic weights of cells in each pyramidal neuron subcluster**  
 Select cisTopic topics that exhibited cluster specificity are shown. The y-axis represents the weight of each topic for each cell by cluster identity (x-axis). Asterisk denotes putative assignment.

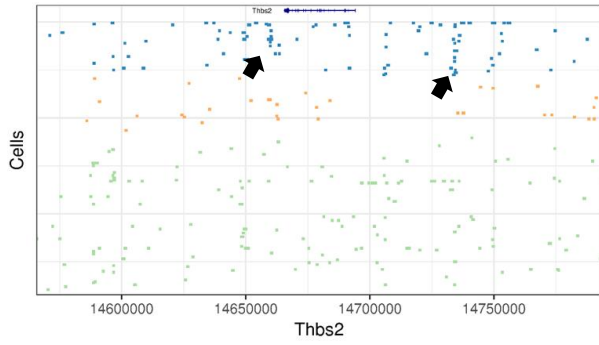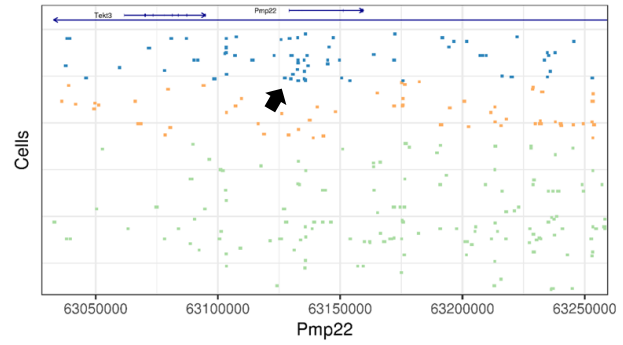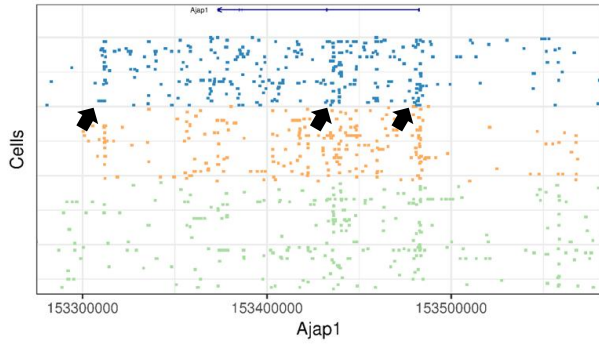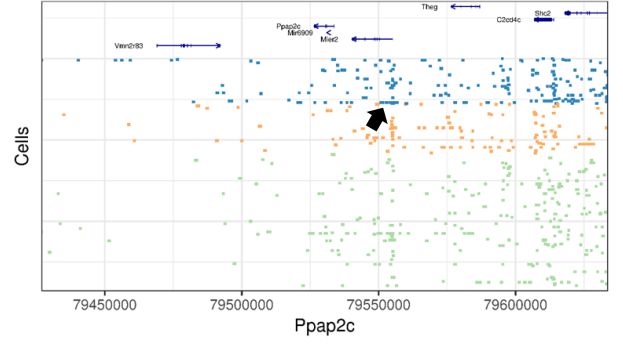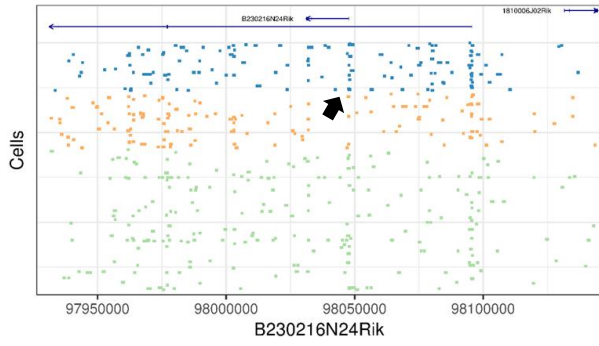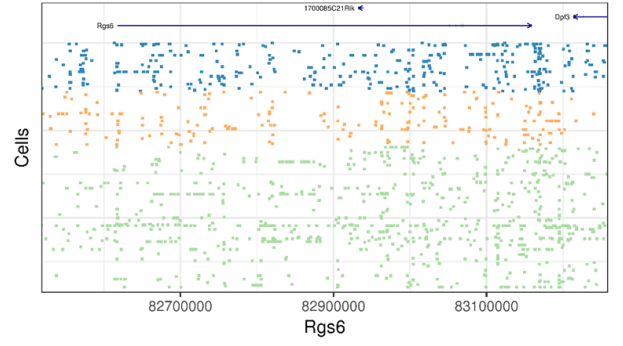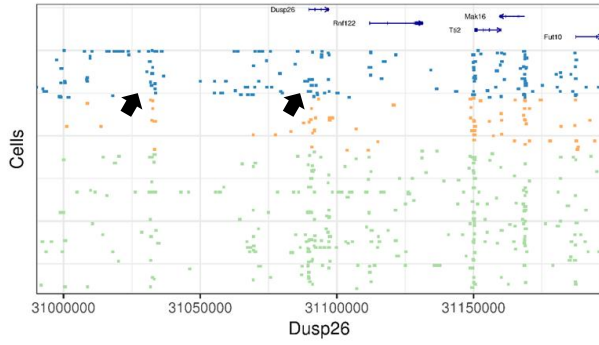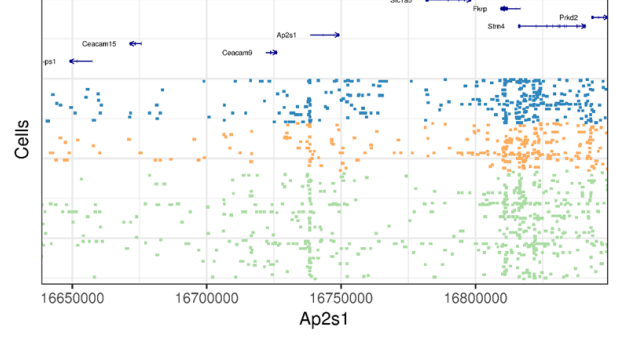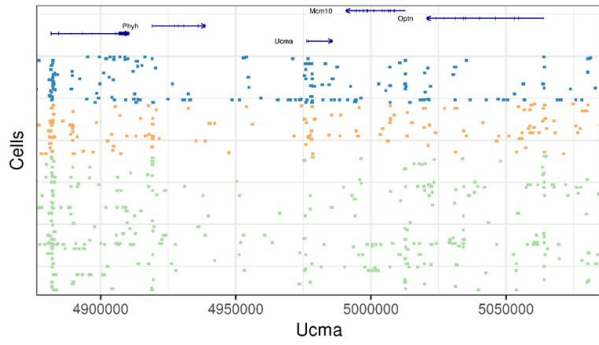

**Supplemental Figure 19: Mossy Cell marker gene read plots**

Modest enrichment of accessibility was observed in one of the three clusters (blue). Arrows denote peaks enriched in the corresponding cell population.

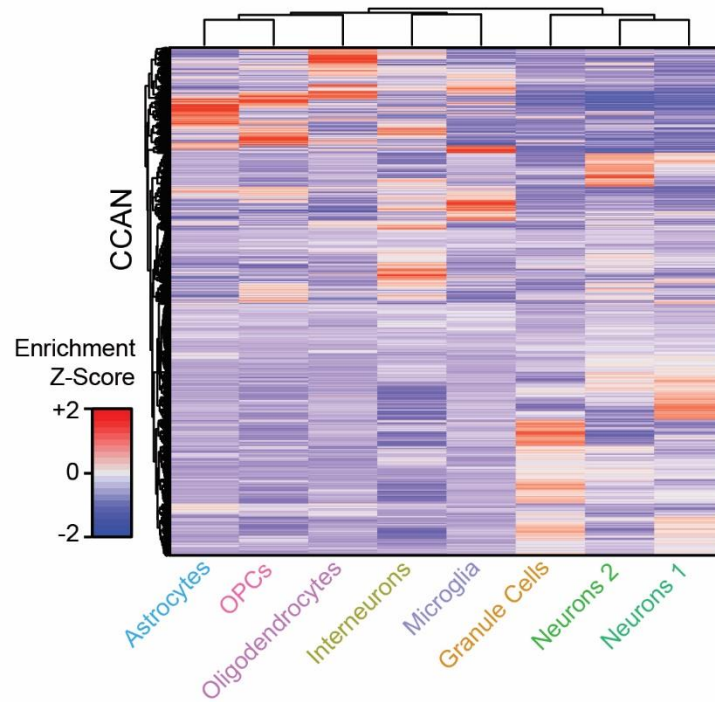

**Supplemental Figure 20: Hierarchical clustering of CCANs by cell type enrichment**  
 Hierarchical clustering of enrichment z-scores for peaks contained within each CCAN with respect to cell type.

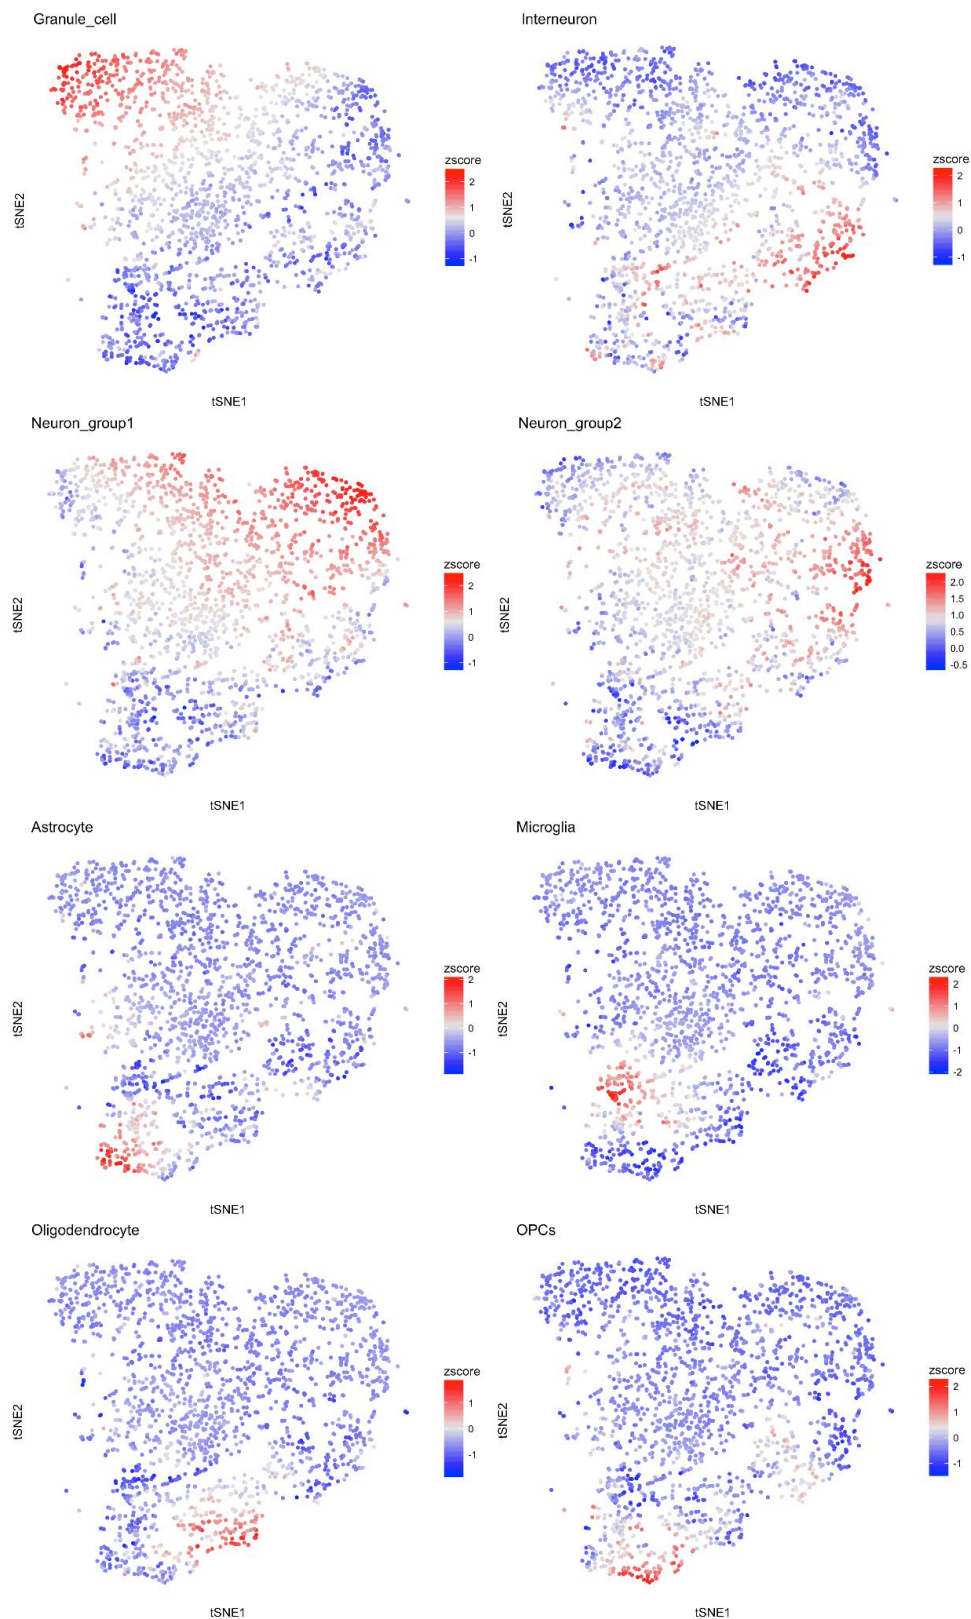

**Supplemental Figure 21: CCAN cell type enrichments on tSNE projections**

Enrichment for CCAN's within each cell type is plotted as in Fig. 3, but for each of the eight major clusters.

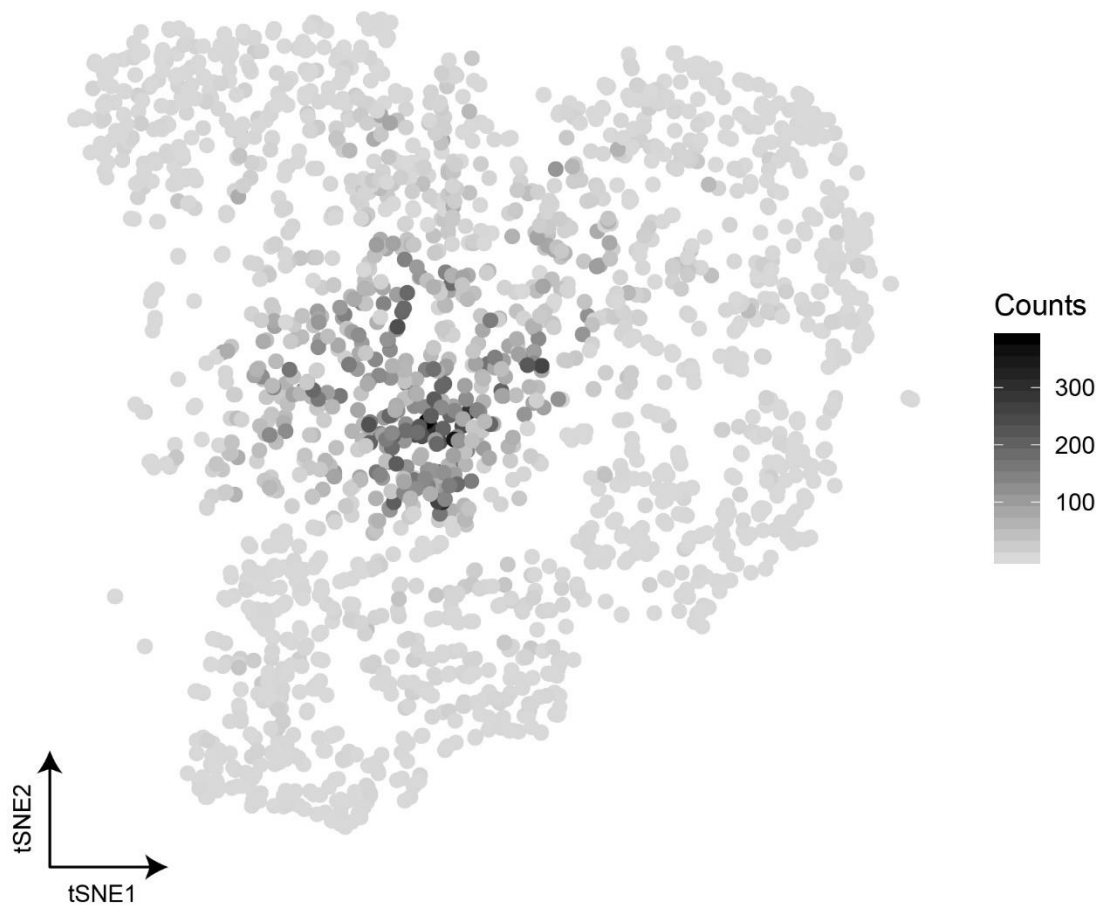

### Supplemental Figure 22: CCAN peak counts

tSNE of CCANs by cell type specificity (as in Figure 3), but shaded by peak membership count. CCANs with greater numbers group towards the center and are less-cell type specific overall. This is likely due to modular CCANs where certain portions of CCANs are cell-type-specific that link up with other, more universally established CCANs, as in the Prox1 example.

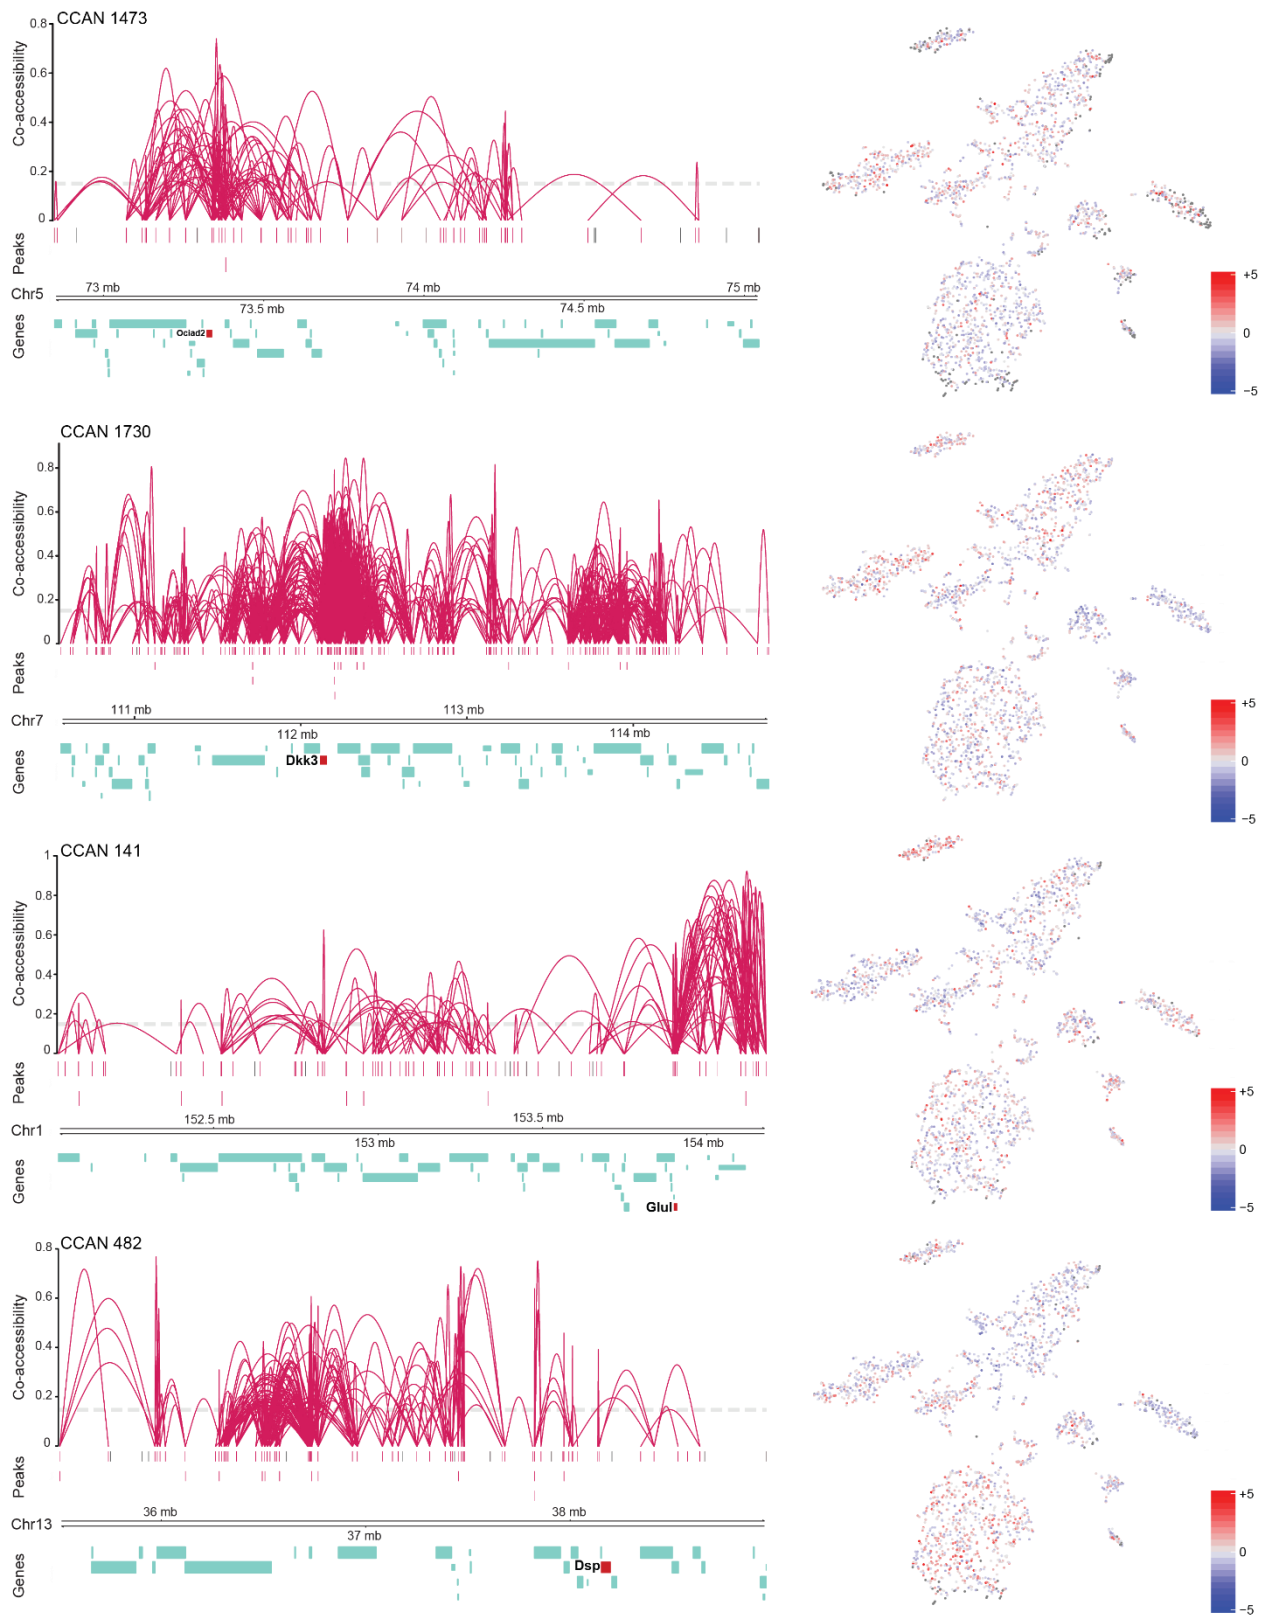

### Supplemental Figure 23: Additional cell-type-specific CCANs

Left: plots of the CCANs near cell-type-specific marker genes. Right: Accessibility enrichment across cells.

**A**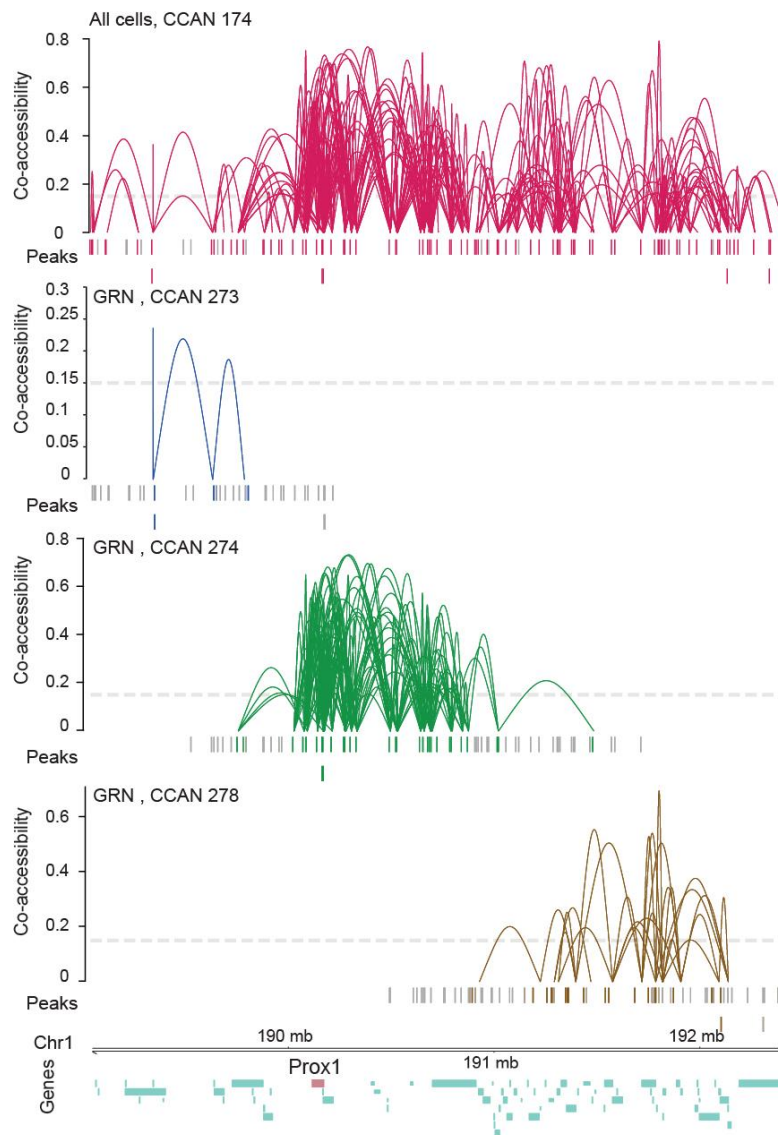**B**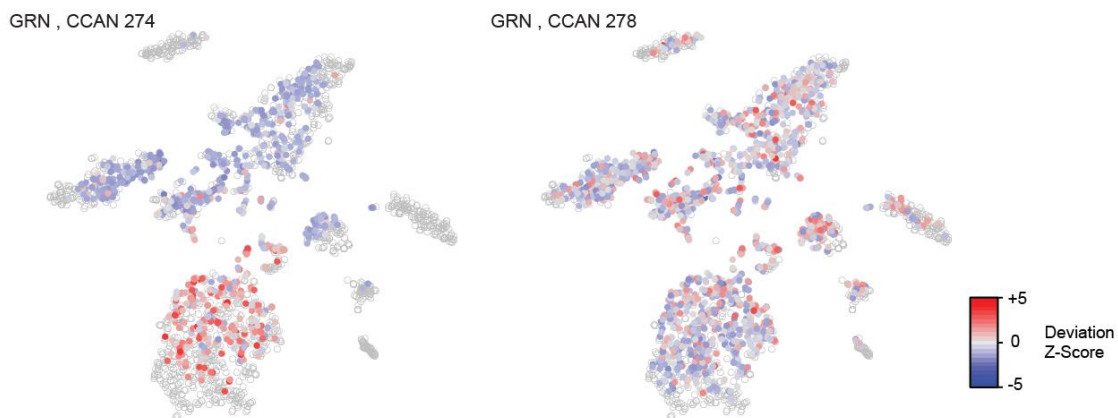

### Supplemental Figure 24: Dissection of CCAN 174 (*Prox1*)

A) CCAN 174 as determined by Cicero performed on all cell types (top). The CCAN is large and likely contains links that are not cell-type specific. When Cicero is carried out only on the dentate granule cell population, the larger CCAN is split into three distinct networks. B) The cell-type specificity for the granule-specific CCAN (274) centered on *Prox1* is more accessible than the adjacent CCAN that does not exhibit cell type specificity (278).

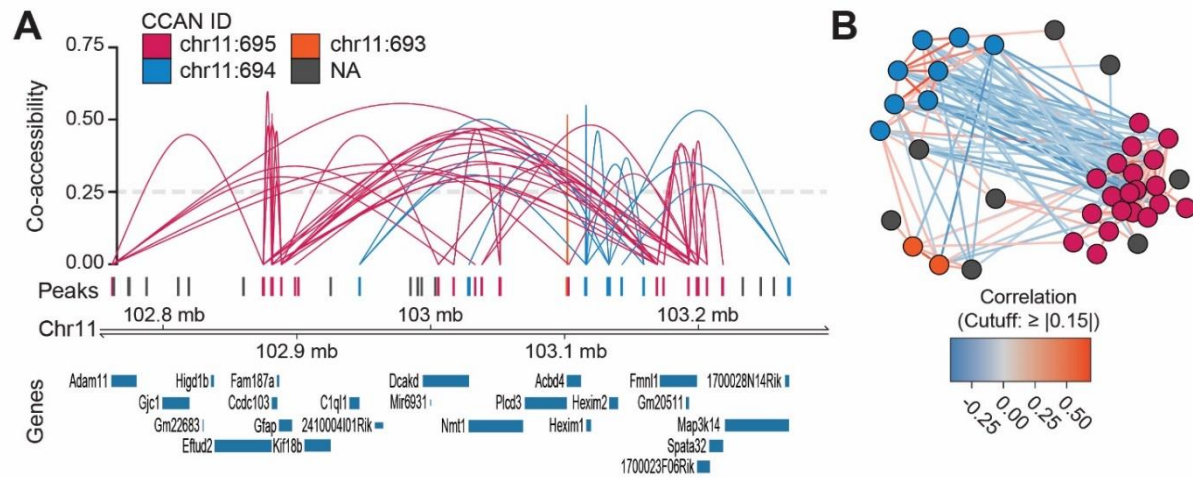

### Supplemental Figure 25: Mutually exclusive CCAN

A) Example of a mutually-exclusive set of CCANs that includes the astrocyte marker gene *Gfap*. CCAN 695 (pink) and 694 (blue) overlap one another in genome positions; however, they are comprised of mutually-exclusive peak sets, suggesting two alternative chromatin conformations. B) The mutually exclusive CCAN peak sets have negative correlations with peaks from one another's network.



**A**

Sci-ATAC-seq standard scitools analysis workflow

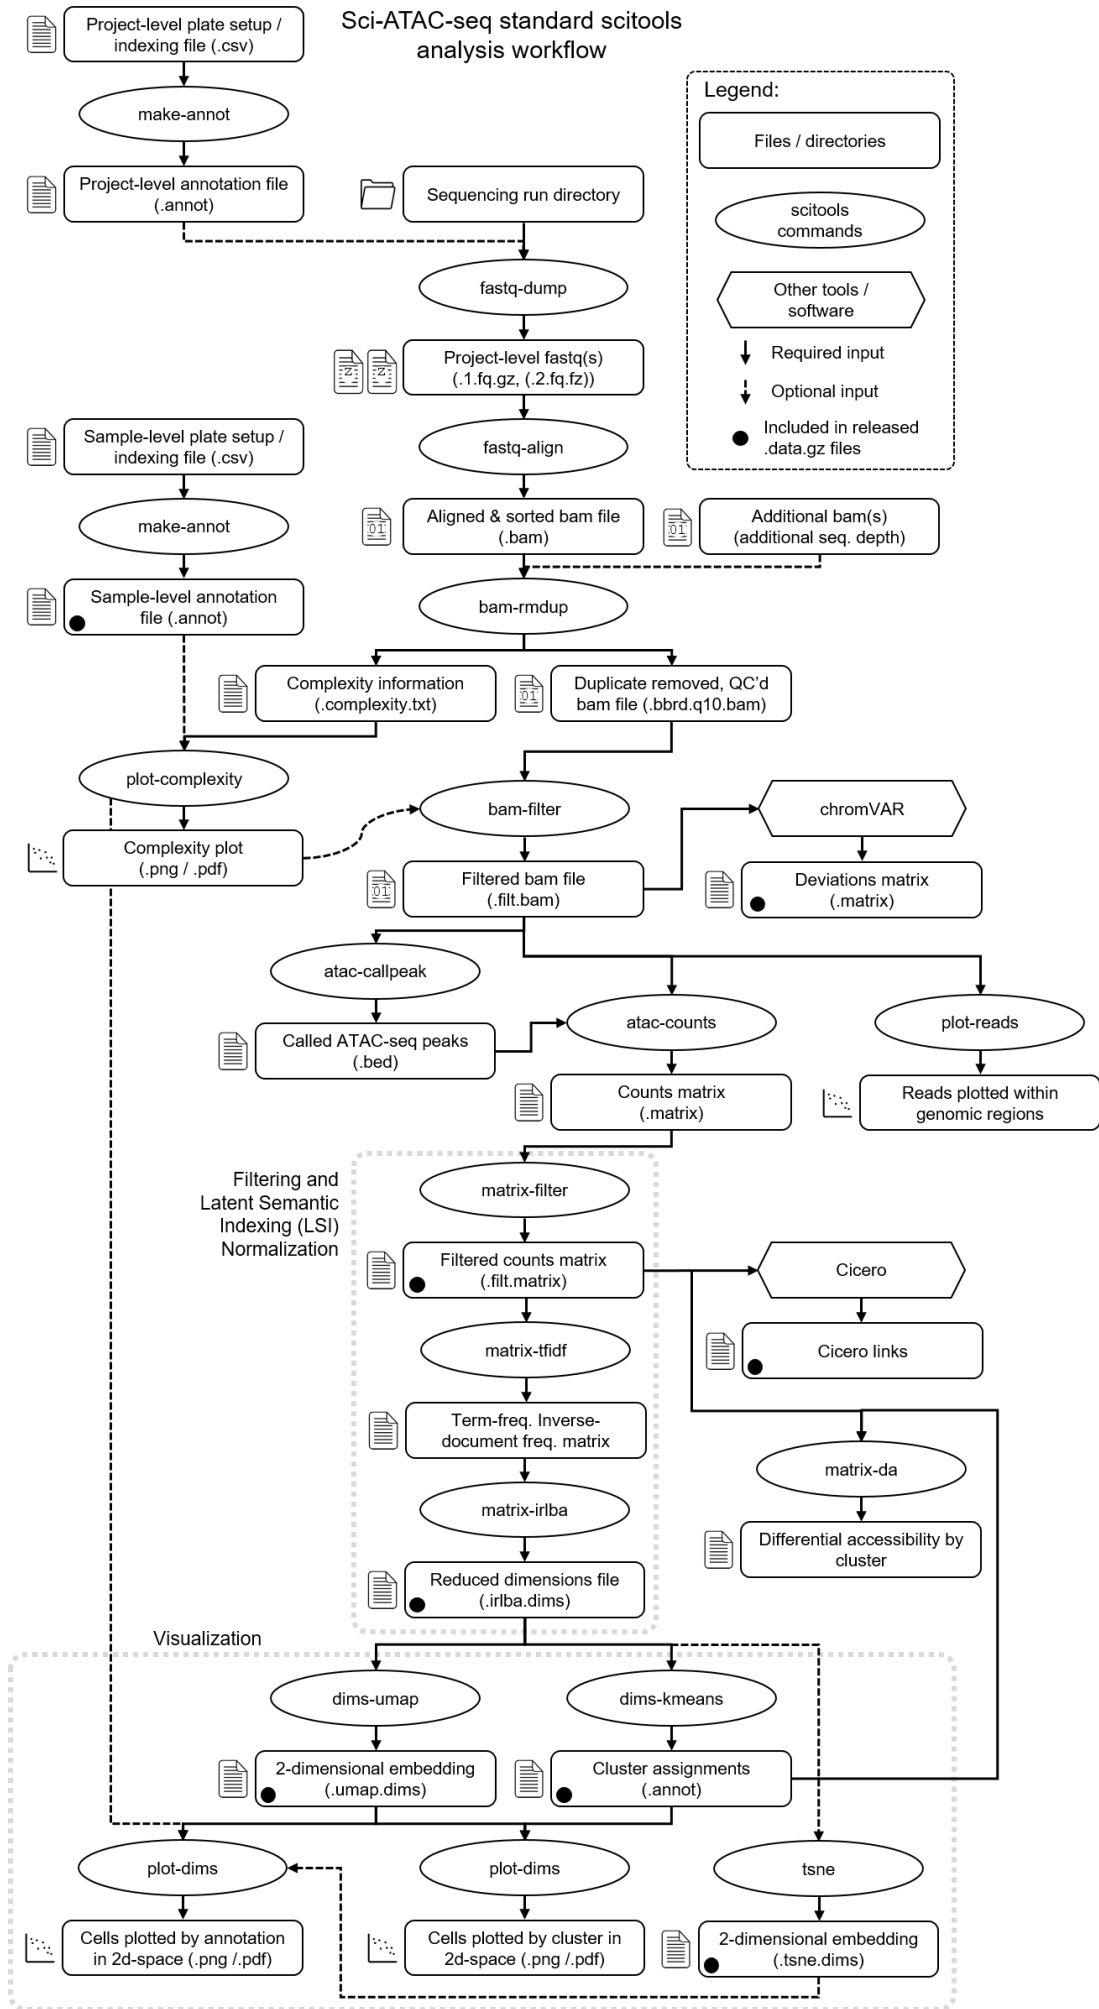

**B**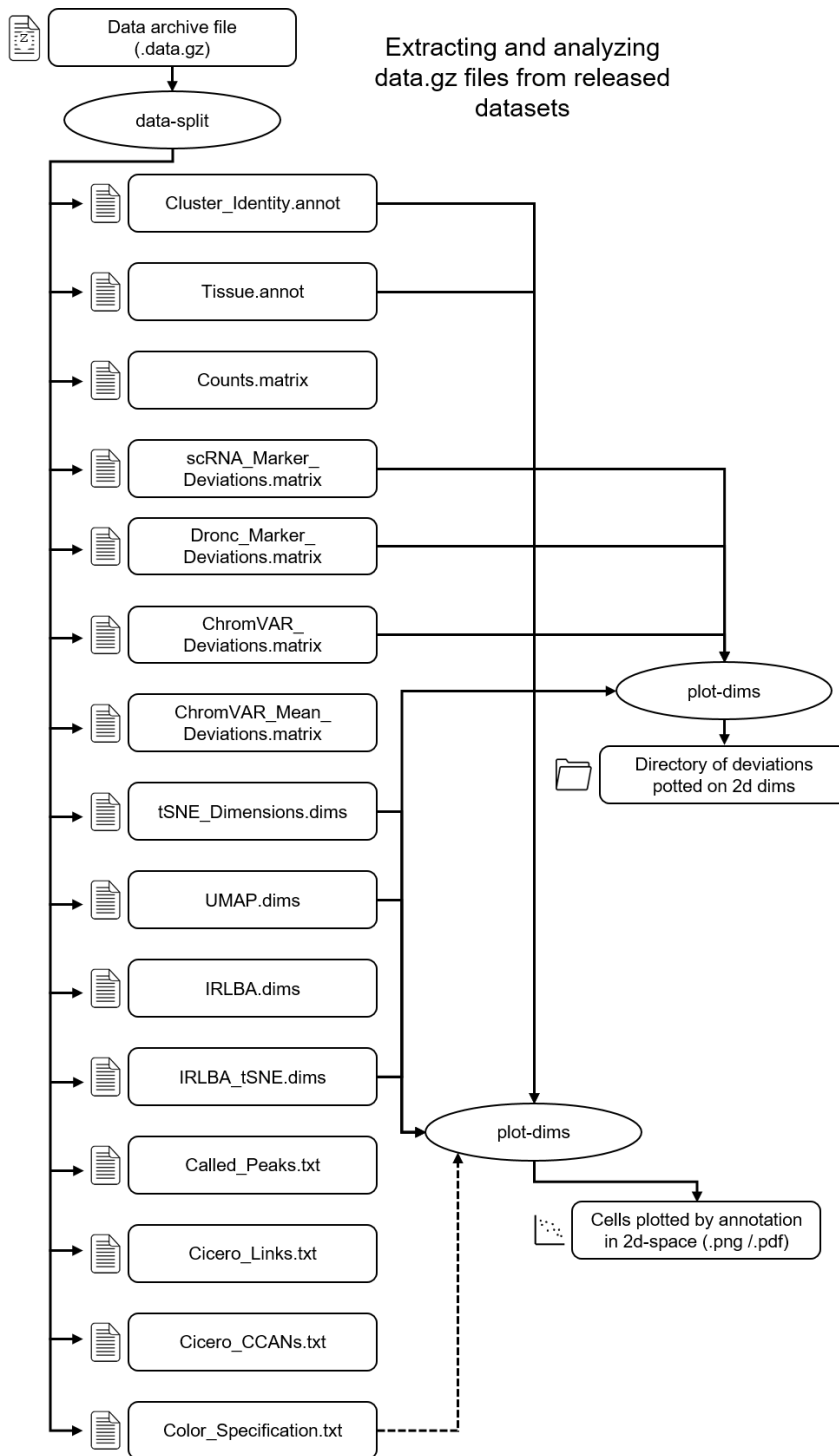

### Supplemental Figure 26: Scitools analysis and data access workflow

A) Detailed breakdown of all analyses performed by scitools in this study, and general best-practice guidelines for processing sci-ATAC-seq data using scitools. B) scitools data-split command to extract data files associated with this study from the GEO archive.

## Supplemental Note 1: Data & Software Description

We have released our data in a format compatible with the scitools software suite, which can be found at <https://github.com/adeylab/scitools>. For more information on scitools commands and usage, refer to user manual provided at the GitHub site.

To extract associated data, run the following command:

```
$ scitools data-split [dataset].data.gz
```

This will produce a set of files for each of the data sets with self-descriptive titles:

| File                     | InVitro | InVivo | Comb. | Description                              |
|--------------------------|---------|--------|-------|------------------------------------------|
| Cluster_Identity         |         |        |       | Cluster assignments                      |
| Tissue                   |         |        |       | Tissue assignments                       |
| Counts                   |         |        |       | Counts matrix (unfiltered)               |
| scRNA_Marker_Deviations  |         |        |       | Linarsson lab marker gene set deviations |
| Dronc_Marker_Deviations  |         |        |       | Regev Lab Dronc-seq gene set devaitons   |
| ChromVAR_Deviations      |         |        |       | Motif deviations                         |
| ChromVAR_Mean_Deviations |         |        |       | Mean motif deviations by cluster         |
| tSNE_Dimensions          |         |        |       | LSI-tSNE 2D dimensions                   |
| UMAP                     |         |        |       | LSI-UMAP 2D dimensions                   |
| IRLBA                    |         |        |       | IRLBA 50 dimensions                      |
| IRLBA_tSNE               |         |        |       | IRLBA-tSNE 2D dimensions                 |
| Called_Peaks             |         |        |       | Called peaks                             |
| Cicero_Links             |         |        |       | Cicero peak correlations (all)           |
| Cicero_CCANs             |         |        |       | CCANs from Cicero links                  |
| Color_Specification      |         |        |       | Color coding for plotting                |

Scitools commands can then be run to reproduce figures in the manuscript. Below are several examples:

- 1) Plotting tSNE projections of cells:

```
$ scitools plot-dims -A [dataset].Cell_Type.annot [dataset].tSNE.dims
```

- 2) Plotting the chromVAR deviation scores onto tSNE dims:

```
$ scitools plot-dims -M [dataset].ChromVAR_DevZ.matrix  
[dataset].tSNE.dims
```

The counts matrix is also produced by the data-split command which can be used to run other scitools functions, for example:

- 1) Performing latent semantic indexing:

- a. Filter matrix:

```
$ scitools matrix-filter -C 1000 -R 50 [dataset].Counts.matrix
```

- b. Tfidf transform:

```
$ scitools tfidf [dataset].Counts.matrix
```

- c. Perform LSI:

```
$ scitools lsi [dataset].tfidf
```

d. Perform tSNE:

```
$ scitools tsne [dataset].tfidf.LSI.matrix
```

2) Alternative dimensionality reduction strategies:

a. On the tfidf matrix, perform irlba:

```
$ scitools irlba [dataset].tfidf
```

b. Perform tSNE:

```
$ scitools tsne [dataset].tfidf.irlba.matrix
```

To list additional commands that can be run on the datasets, run the following:

```
$ scitools list
```

Additional Supplementary Data files contain bed files for topics associated with pyramidal neuron subclustering and homer motif calling results on the respective topics along with annotation files for subclustering, UMAP dimensions, and cisTopic weight matrices.

Supplementary Data – CisTopic\_Subclustering\_1.rar

Supplementary Data – CisTopic\_Subclustering\_2.rar

# Supplementary Protocol – sci-ATAC-seq

## Reagent Preparation:

### Preparing NIB (50mL):

- Note: For most preparations, 15mL is fine. NIB seems to stay for ~1 month.

| Final Concentration                                       | For Construction               |
|-----------------------------------------------------------|--------------------------------|
| 10 mM Tris, pH 7.5                                        | 500 uL of 1M Tris, pH7.5       |
| 10 mM NaCl                                                | 100 uL of 5M NaCl              |
| 3mM MgCl <sub>2</sub>                                     | 150 uL of 1M MgCl <sub>2</sub> |
| 0.1 % Igepal                                              | 500 uL of 10% Igepal           |
| <b>0.1 % Tween</b>                                        | <b>500 uL of 10% Tween</b>     |
| ddH <sub>2</sub> O                                        | to 50 mL                       |
| Protease Inhibitor<br>(Only if dealing with tough tissue) | 2 tablets                      |

## Tissue preparation:

### Mechanical dissociation in NIB of Flash-frozen brain tissue

- For each 1.5mL tube containing flash-frozen tissue:
  - Resuspend in 100 uL ice cold NIB.
  - Pipette up and down to break up cells. (~10-20 times)
  - Incubate on ice for 10 minutes.
  - Add another 100 uL ice cold NIB
  - Pipette up and down to break up cells (this time until all flaculents dissociate)
  - Run total volume through 100um filter.
  - Add 3uL DAPI (@5mg/mL)
  - Incubate for 3 min then load sample into flow sorter.
  - Store on ice until ready.
  - Sort.

Transposase should be prepared according to Picelli *et. al.* Genome Research 2014 and diluted to 17.9 uM

### Anneal indexed oligos to ME':

For each i5 barcoded oligo:

- a. 12.5 uL 100 uM i5 barcoded oligo
- b. 12.5 uL 100 uM MEr oligo
- c. 53.125 uL 2x Tn5 dialysis/dilution buffer

For each i7 barcoded oligo:

- a. 8.5 uL 100 uM i7 barcoded oligo
- b. 8.5 uL 100 uM MEr oligo
- c. 36.125 2x Tn5 dialysis/dilution buffer

Anneal: 95C, 5 min, then -5C/2 min to 20C

*result: ~78 uL of 16 uM i7 or i5/MEr*

### Plate indexed oligos:

III. In 96 well plate:

- a. Add 5 uL of i5/MEr (16 uM) to respective wells
- b. Add 5 uL of i7/MEr(16 uM) to respective wells

*result: 10 uL at 8uM/well*

### Load uniquely indexed tn5s:

Tn5 + salt:

Tn5 Stock @ 17.9 uM.

For every: 12 uL of Tn5 stock, add 1.5 uL 5M NaCl

Then, add 12 uL of salt-adjusted Tn5 to each oligo well

*result: 8 uM Tn5 @ 500 nM NaCl*

Incubate to assemble Tn5/oligo mixture for 1 hour @ 25C

CRITICAL: Freshly annealed oligos must be used. Annealed oligos that have been subjected to a freeze-thaw cycle will not form viable complexes. Once complexed, transposomes can be stored in the freezer and can be used for up to 6 months without an observable decline in library preparation quality.

## For first sort preparation:

- Prepare Plates:
  - Per well use 5uL NIB and 5uL TD Buffer (2X) from Illumina.
  - Sort 2K-5K nuclei into each well using FACS protocol (below).
    - Note, numbers may vary by prep, but ensure that numbers *within* a prep are constant.
      - I.e. all wells receive the same number of cells.

## First Sorting Protocol (Sony SH800):

- Before turning on the Sony SH800 Cell sorter:
  - Check black metal Sheath fluid container.
    - If liquid is low, fill with sheath fluid (in jug dispenser)
    - If jug dispenser is low, dilute out 50X Sheath fluid stock (in boxes near jug dispenser) with DI water
    - Ensure sheath fluid container is firmly closed before continuing
  - Turn on air (in back room, behind door)
  - Check pressure rises to 80 psi.
- Start Sony sorter and wait until it gets to standby.
  - Open Cell sorter software
  - Scan in QR code using the webcam for sorter chip. For most sciATAC experiments, chip should be 100um size.
- Calibration and System Check
  - Blue calibration beads are located in liquid droppers in the fridge
    - These are light sensitive
    - A working stock is generally available contained in a sorting tube in the same box
    - Choose 405 and 488 for DAPI sorting
  - Continue through the calibration and system check wizard.
  - Wait for fluid check, to complete (~30 min or so)
  - If check or calibration fails, follow protocol in the manual
- Set Up Experiment
  - Name experiment and turn on FSC, BSC, FL1 (set to DAPI in drop-down menu)
  - Make sure height and area are selected for all of them
  - Check instrument tank levels:
    - If DI water tank is low:
      - Open side door of the Sony (left side when facing its front)
      - Unclip the large plastic bottle from the lines (this is the DI water bottle)
      - Refill with DI water from dispenser jug.
      - More DI water is available in lab next to sorting room (use Millipore Purified water)
        - Sorting room key also works on that lab door if locked
    - If Waste tank is too high:
      - Slide out waste tank from bottom shelf under the sorter.
        - The waste tank has a red line leading into it.
      - Unscrew the cap and move to the back room.
      - Add bleach to the waste liquid and pour down sink
  - Perform water de-bubble

Cytometer > Settings > Maintenance > DI filter-debubble

Check chamber with samples and lasers is wiped down and clean

If any salt residue is visible, wipe down chamber and magnetic plates with DI water  
Ensure everything is dried by kimwipe (water droplets will mess up the charge of droplets)

Set Cytometer chambers to 5C

Cytometer > Collection > Sample 5C

Cytometer > Collection > Collection Chamber 5C

Set Up Gates (y by x)

BSC-A vs. FSC-A (All Events): Dot plot

- Use an oblong gate (GATE A) to include almost all events, point here is the exclude bottom left high density of debris/false events

DAPI-H vs. DAPI-A (GATE A): Dot plot

- Should see a strong diagonal bias in this plot
- Use a polygon gate (GATE B) to select events along this diagonal.
- If you switch to a density plot, you should be able to see a population forming at  $\sim 10^{4.5}$  along the diagonal (these are the singleton nuclei)

BSC-A vs. DAPI-A (GATE B): Dot plot

- Should see two or more sweeping patterns along the dot plot.
  - The first swoop should be wider, this is debris
  - The second swoop should be tighter and more defined, this is nuclei
  - Any subsequent swoops are doublets, triplets etc. these should be less populated and smaller
- Use a polygon gate (GATE C) to select for the nuclei population (second swoop)
  - **SORT ON GATE C**

Events vs. DAPI-A: (GATE C) Histogram

- This plot should show a strong and tight peak, with the nuclei
- You may see a degenerative smaller outward peaks forming which are the doublets, triplets etc.
  - If this is the case, make sure your GATE C is tight around the single nuclei swoop

Add sample to sample chamber

Assign tube based on biological source

Test the rate and the sample to set gates.

Sample pressure is by default 4, this can be increased to 6 to increase the rate of events.

- Do not exceed 7, the sample line might pop off due to pressure

Set to sort on 2-5K nuclei/well (dependent on experimental design)

Select sort gate (GATE C)

Load collection tubes and perform sorting.

Sort using the "Normal" setting, not "single-cell" (this step doesn't need as much precision)



Example sorting set up.

Note: some of the axes and gates are different than described in the above protocol, but looks should be similar.

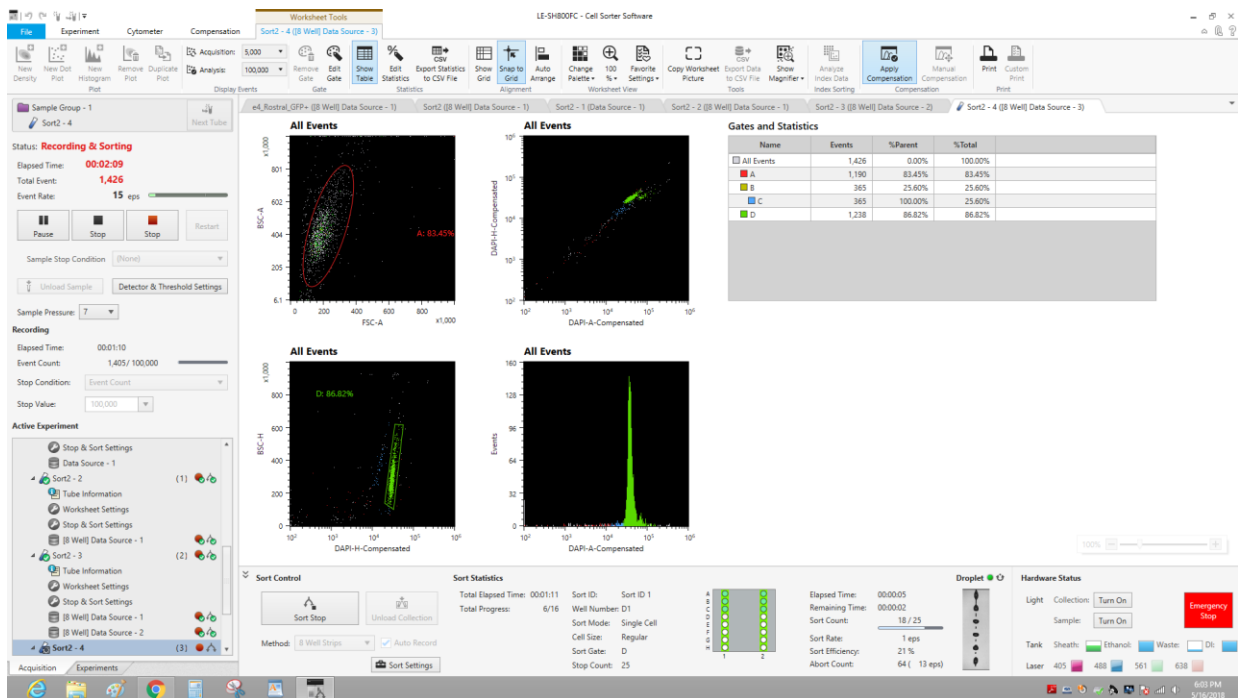

- Following sorting
  - Perform a DI rinse.
  - Put sorting in standby mode and proceed to tagmentation.
    - Standby mode relieves the pressure on the machine.
      - Cytometer > Options > Advanced Options > Standby

## Tagmentation:

Spin down plate immediately after sorting finishes.

Store covered and on ice until the full plate is complete.

Note: to cover strips as they finish sorting, I tend to tear up aluminum plate covers into single-strip width.

- Add 1uL 8uM uniquely indexed transposome to each well
- Seal plate and incubate at 55C for 15 minutes with gentle shaking (on eppendorf thermomixer, ~300 rpm).
- Plate plate on ice immediately to stop reaction. **Keep samples on ice to prevent over-transposition and nuclei lysis.**
- Pool all wells, while maintaining everything on ice.
- Add 2uL/per mL pooled sample of DAPI (5mg/mL) and bring to sorter for second sort.

## Second Sort Plate Setup:

- Add 0.25  $\mu$ L 20 mg/mL BSA, 0.5  $\mu$ L 1% SDS, 7.75  $\mu$ L nuclease-free water to each well
- Add 2.5  $\mu$ L of 10  $\mu$ M i5 Indexed PCR Primer and 2.5  $\mu$ L of 10  $\mu$ M i7 Indexed PCR Primer prior to sort.

## Second Sort Protocol:

- Thaw RT-PCR reagents on ice before second sort
- Sort **X** nuclei per well (X is dependent on number of wells tagged in first sort, as a linear trend)
  - **1 plate = 22 nuclei/well**
  - **1.5 plates = 33 nuclei/well**
  - **2 plates = 44 nuclei/well etc...**
- Using same gates as first sort:
  - Sort **X** nuclei per well with modified sort settings:
    - "Single cell" rather than "Normal"
    - This leads to a higher abort count (less efficient sorting) but is far more precise

**Keep sorted samples on ice.**
- After sorting:
  - Perform a Shut down rinse on the machine using 15 mL volumes
    - Cytometer > Shut down Rinse
    - Perform both the bleach cleaning and the DI rinse
      - a. Select option to store DI water in machine upon shut down
    - Follow the instructions on the shutdown wizard
- Once machine is turned off:
  - Turn off the air in the back room.
  - Release pressure using the toggle on the air line
  - Release pressure from the machine by pulling on the top ring of the sheath fluid container.
  - Ensure lights are off and door is locked.

## Transposase Denaturation and PCR Setup:

- Spin down plate
- Cover plate and hold on ice until sorting is complete.
- Denature Tn5 in a Thermocycler by incubating at 55C for 15 minutes
- To each well add: 7.5  $\mu$ L NPM, 4  $\mu$ L nuclease-free water, 0.5  $\mu$ L 100X SYBR Green

### PCR:

Perform PCR on a real-time thermocycler

| Temperature (C) | Time       |            |
|-----------------|------------|------------|
| 72              | 5 min      |            |
| 98              | 30 sec     |            |
| 98              | 10 s       |            |
| 63              | 30 s       |            |
| 72              | 1 min      | x30 Cycles |
|                 | PLATE READ |            |
| 72              | 10 s       |            |

Pull plates once a majority of wells are mid-exponential phase

Following PCR, plates can be stored in Post-PCR Fridge at 4C until cleanup.

- Library Clean up and Quantification:

- Well Pooling:

Pool 10uL for each well.

Ran full pool volume through Qiaquick PCR column following manufacturer's protocol.

Eluted in 32 uL 10mM Tris HCl pH 8

Quantified 2 uL in 2:200 dsDNA HS Qubit assay

- This is to ensure that the library amount will be visible on a gel.

- Gel Extraction Clean-up (Optional – perform if adaptor band is present):

Loaded 10uL of Library pool (+2uL 6X Loading Dye) in 1% Agarose made with SeqPlaque low-melt agarose.

Ran sample for 45min at 110V

Ran 100bp Plus Ready-to-Load Generuler Ladder (5uL)

*Example Gel Cut: Note the adaptor dimer at ~110bp which was excluded in the cut.*

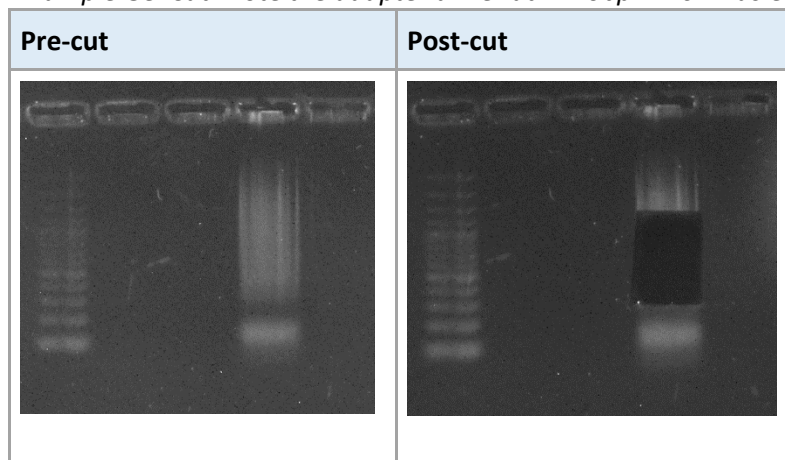

- Gel extracted from ~250-1.3Kb and performed Qiaquick Gel Extraction protocol following manufacturer's instructions.
- Eluted in 25 uL 10mM Tris-HCl, pH 8
- Quantified with 2uL:200uL total volume Qubit Broad Range
- Use Qubit reading to dilute to ~4ng/uL and run 1uL on HS Bioanalyzer chip
- Run 1uL of sample at 4ng/uL library dilution on Bioanalyzer High-Sensitivity DNA chip (following manufacturer's protocol)
  - Quantify library from the range of 100-1000bp
  - Dilute this down to 1nM concentration for sequencing.

- Example DNA HS Bioanalyzer Traces: Note the 97 and 115 bp peaks of adapters in the Pre-Cut Sample.

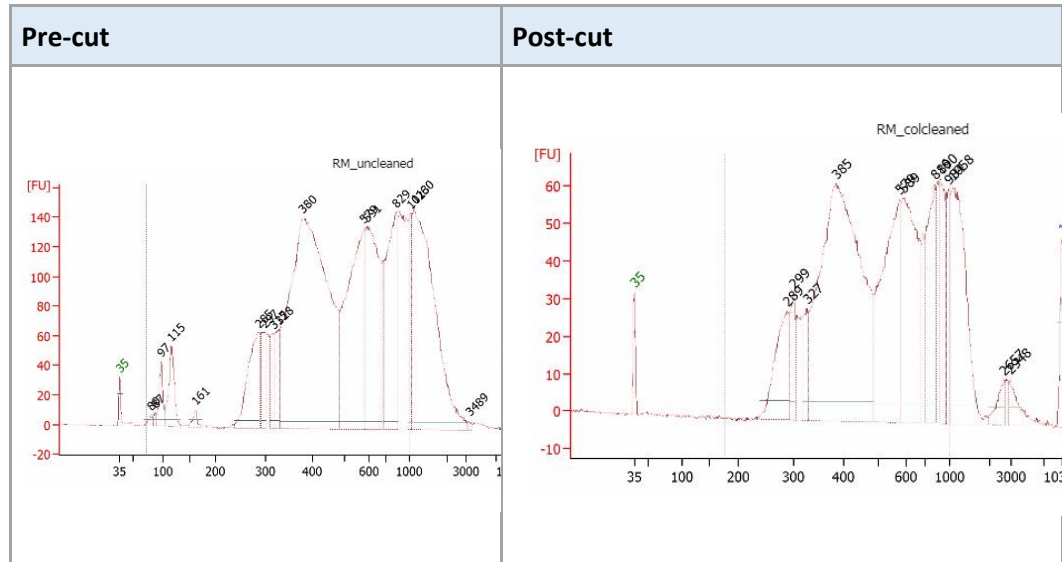

## Custom Nextseq500 Chemistry Protocol

### Thawing Reagents

#### The Reagent Cartridge:

Ensure to take the correct kit for capacity (Mid/High) and number of cycles (150/300).

Make sure it is a v2 kit.

Remove from and thaw at 4°C overnight (at least 18 hours) or in a RT diH<sub>2</sub>O bath for 1 hour.

Once thawed, cartridge can be stored at 4°C for a day, if need be.

#### The Flow Cell:

Remove from Pre-PCR O'Roak Lab fridge and allow to reach room temperature, while still covered in packaging (~30min)

- Note: flowcell is light-sensitive and should remain in packaging until sequencer is being loaded.

- **The HT1 Buffer:**

- These boxes are not cycle/capacity specific for kits, so any will work.
- Open box and thaw HT1 Buffer in diH<sub>2</sub>O until fully liquid.
  - Following full thaw, store on ice until ready to use.

- **1N NaOH Stock Solution:**

- Thaw at RT

- **Custom Sequencing Primers:**

| Primer Identity | Oligo Name          |
|-----------------|---------------------|
| Read 1 Primer   | AA221_CPT_R1_Primer |
| Read 2 Primer   | AA222_CPT_R2_Primer |
| Index 1 Primer  | AA223_CPT_I1_Primer |
| Index 2 Primer  | AA224_CPT_I2_Primer |

Thaw at RT

### Dilutions

- Make 1mL of fresh 0.2N NaOH from stock.
  - 200uL 1N NaOH + 800uL ddH<sub>2</sub>O
- Dilute libraries based on Bioanalyzer quantification from 200-1000bp and generate final pool.
  - 20uL at 1nM concentration.
  - If any libraries are being spiked in, ensure volumes are correct for final pool
    - e.g. 5% spike in means 1uL of the final 20uL 1nM Library Pool should be the spike-in library
  - Combine 20uL 1nM Library Pool + 20uL 0.2N NaOH
  - Vortex and spin down.
  - Incubate at RT 5 mins
  - Add 200uL 200mM Tris-HCl pH 7.5
  - Vortex and spin down.
  - Add 940 uL HT1
    - This dilutes to 20pM
  - Place 20pM library pool on ice until ready to proceed.
- Dilute library to loading concentration.
  - For sciATAC standard assays, we load at 1.1pM
  - 82.5uL 20pM Library Pool + 1417.5 uL HT1
    - Total volume is now 1.5mL at 1.1 pM
    - Vortex to mix and store on ice.

- Dilute primers to loading concentration.

| Final Diluted Reagent         | Primer Identity | Oligo Name          | Stock Concentration | Loading Concentration | Volume of Stock Oligo | Volume of HT1 Dilutant | Total Volume |
|-------------------------------|-----------------|---------------------|---------------------|-----------------------|-----------------------|------------------------|--------------|
| Custom Read 1 Primer Dilution | Read 1 Primer   | AA221_CPT_R1_Primer | 100uM               | 0.6uM                 | 9uL                   | 1491uL                 | 1500uL       |
| Custom Read 2 Primer Dilution | Read 2 Primer   | AA222_CPT_R2_Primer | 100uM               | 0.6uM                 | 9uL                   | 1491uL                 | 1500uL       |
| Custom Index Primer Dilution  | Index 1 Primer  | AA223_CPT_I1_Primer | 100uM               | 0.6uM (when combined) | 18uL                  | 1482uL                 | 1500uL       |
| Custom Index Primer Dilution  | Index 2 Primer  | AA224_CPT_I2_Primer | 100uM               | 0.6uM (when combined) | 18uL                  | 1482uL                 | 1500uL       |

- Combine full volumes of Index 1 Primer and Index 2 Primer Dilutions to a total of 3mL Custom Indexing Primer Pool

### Loading the Reagent Cartridge

- Ensure the Reagent cartridge is fully thawed.
  - Without inverting the cartridge, lift up and check underneath. Tilt cartridge back and forth to ensure reagents are flowing as liquid and not frozen.
- Using a sterile pipette tip, puncture the aluminum seals for cartridge positions 7,8,9, and 10.
- Load the specified dilution and volume into each position.

| Cartridge Position | Reagent                       | Total Volume |
|--------------------|-------------------------------|--------------|
| 7                  | Custom Read 1 Primer Dilution | 1500 uL      |
| 8                  | Custom Read 2 Primer Dilution | 1500 uL      |
| 9                  | Custom Index Primer Dilution  | 3000 uL      |
| 10                 | Library Dilution              | 1500 uL      |

## Loading the Nextseq

- Load up the Illumina Control Software.
- From the Home Screen press the "Sequencing" button and follow the set-up wizard to load the sequencer.
- For sciATAC runs:
  - a. Use a custom protocol:
    - i. For Mid Capacity 150 kits: "NextSeq CPT 10bp Mid"
    - ii. For High Capacity 150 kits: "NextSeq CPT 10bp High"
  - b. Select option: "Paired End"
  - c. Set number of cycles and custom primer options:

|                | Read 1 | Read 2 | Index 1 | Index 2 |
|----------------|--------|--------|---------|---------|
| Cycles         | 50     | 50     | 18      | 18      |
| Custom Primer? | yes    | yes    | yes     | yes     |
